# Supplementary material for: Geländer Molecules with Orthogonal Joints: Synthesis of Macrocyclic Dimers
Source: PubMed Central journal article supplement — Chemistry. 2022 Aug 18;28(56):e202201678. doi: 10.1002/chem.202201678 (PMC9804589; doi:10.1002/chem.202201678), 2022-08-18
Supplement: CHEM-28-0-s001.pdf [file CHEM-28-0-s001.pdf]

# Chemistry–A European Journal

Supporting Information

## **Geländer Molecules with Orthogonal Joints: Synthesis of Macrocyclic Dimers**

Adriano D'Addio, Juraj Malinčik, Olaf Fuhr, Dieter Fenske, Daniel Häussinger, and  
Marcel Mayor\*

## CONTENTS

|                                                                                        |    |
|----------------------------------------------------------------------------------------|----|
| HPLC Chromatograms of Macrocycles <b>1</b> and <b>2</b> .....                          | 3  |
| Enantiopure Transformation from <b>2</b> to <b>1</b> .....                             | 4  |
| Circular Dichroism Measurements:.....                                                  | 5  |
| NMR and HR-MS Spectra .....                                                            | 6  |
| 2-bromo-9-(4-nitrophenyl)-9H-carbazole <b>3</b> : .....                                | 6  |
| <sup>1</sup> H NMR (500 MHz, CDCl <sub>3</sub> ):.....                                 | 6  |
| <sup>13</sup> C NMR (126 MHz, CDCl <sub>3</sub> ):.....                                | 7  |
| HRMS (ESI-ToF): .....                                                                  | 7  |
| 9-(4-nitrophenyl)-2-((triisopropylsilyl)ethynyl)-carbazole <b>4</b> : .....            | 11 |
| <sup>1</sup> H NMR (500 MHz, CDCl <sub>3</sub> ):.....                                 | 11 |
| <sup>13</sup> C NMR (126 MHz, CDCl <sub>3</sub> ):.....                                | 11 |
| HRMS (ESI-ToF):.....                                                                   | 12 |
| 4-(2-((triisopropylsilyl)ethynyl)-carbazol-9-yl)aniline <b>5</b> : .....               | 16 |
| <sup>1</sup> H NMR (500 MHz, CD <sub>2</sub> Cl <sub>2</sub> ):.....                   | 16 |
| HRMS (ESI-ToF):.....                                                                   | 17 |
| Monomer <b>6</b> : .....                                                               | 19 |
| <sup>1</sup> H NMR (500 MHz, THF-d <sub>8</sub> ):.....                                | 19 |
| <sup>13</sup> C NMR (126 MHz, THF-d <sub>8</sub> ): .....                              | 19 |
| HRMS (ESI-ToF):.....                                                                   | 20 |
| Dimer <b>7</b> :.....                                                                  | 24 |
| <sup>1</sup> H NMR (500 MHz, THF-d <sub>8</sub> ):.....                                | 24 |
| <sup>13</sup> C NMR (126 MHz, THF-d <sub>8</sub> ): .....                              | 24 |
| HRMS (MALDI-ToF):.....                                                                 | 25 |
| Butadiyne macrocycle <b>2</b> :.....                                                   | 27 |
| <sup>1</sup> H NMR (500 MHz, THF-d <sub>8</sub> ): as used for further synthesis ..... | 27 |
| <sup>1</sup> H NMR (500 MHz, THF-d <sub>8</sub> ): after GPC .....                     | 27 |

|                                                         |    |
|---------------------------------------------------------|----|
| <sup>13</sup> C NMR (126 MHz, THF-d8): .....            | 28 |
| HRMS (MALDI-ToF):.....                                  | 28 |
| Full assignment at 218 K: .....                         | 31 |
| VT- <sup>1</sup> H NMR (600 MHz, THF-d8):.....          | 32 |
| HSQC: at 219 K.....                                     | 33 |
| HMBC: at 219 K .....                                    | 34 |
| COSY: at 219 K.....                                     | 34 |
| ROESY: at 219 K .....                                   | 35 |
| Thiophene macrocycle <b>1</b> :.....                    | 35 |
| <sup>1</sup> H NMR (500 MHz, CDCl <sub>3</sub> ):.....  | 35 |
| <sup>13</sup> C NMR (126 MHz, CDCl <sub>3</sub> ):..... | 36 |
| HRMS (ESI-ToF):.....                                    | 36 |
| Complete Assignment at 218 K: .....                     | 40 |
| VT- <sup>1</sup> H NMR (600 MHz, THF-d8):.....          | 41 |
| COSY: at 218 K.....                                     | 42 |
| ROESY: at 218 K .....                                   | 42 |
| HSQC: at 218 K.....                                     | 43 |
| HMBC: at 218 K .....                                    | 43 |
| Calculations and Structure Analysis.....                | 44 |
| Geometry Optimization and Conformer Analysis.....       | 44 |
| TD-DFT:.....                                            | 46 |
| X-Ray Structure and Optimized Geometries .....          | 47 |
| Cartesians .....                                        | 51 |
| Macrocycle <b>2</b> .....                               | 51 |
| Macrocycle <b>1</b> .....                               | 53 |
| References.....                                         | 58 |

## HPLC CHROMATOGRAMS OF MACROCYCLES 1 AND 2

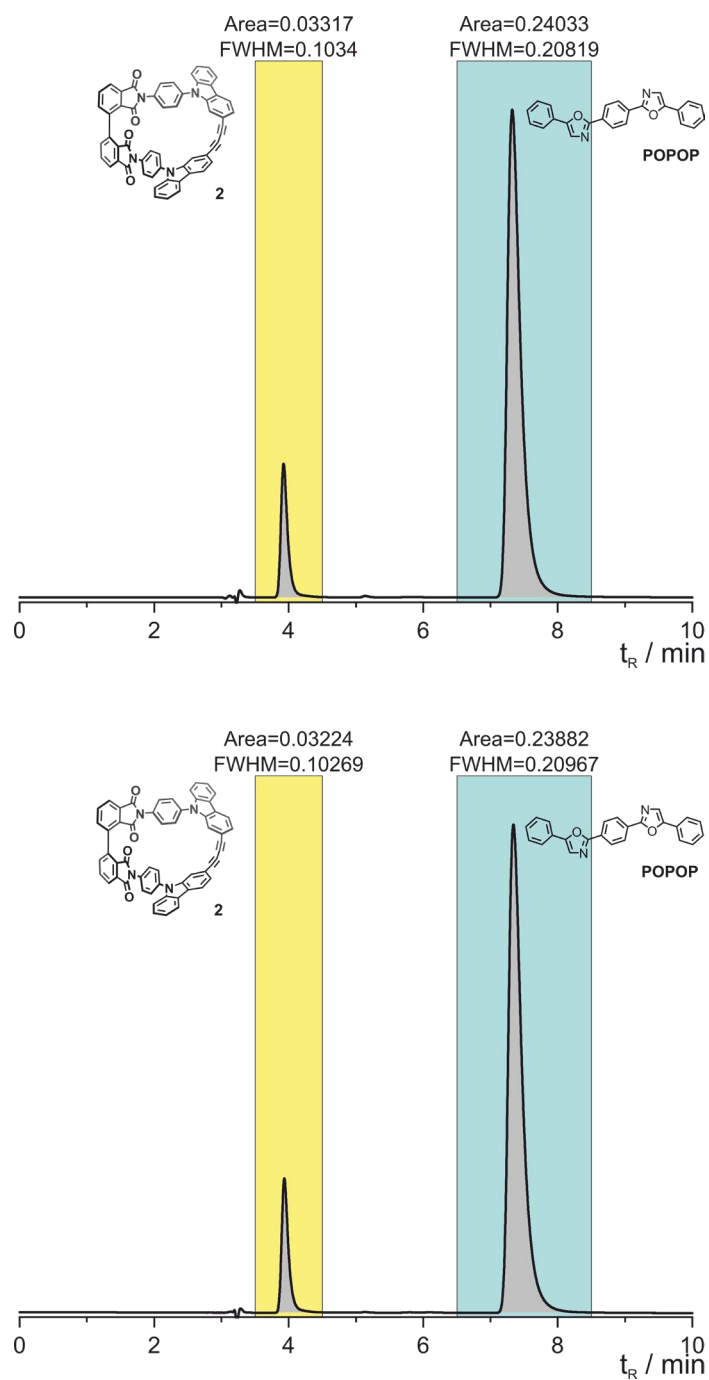

**Figure S1.** A solution (*P*)-**2** and 1,4-Bis(5-phenyloxazol-2-yl)-benzene (**POPOP**) were separated on an analytical chiral HPLC before (top) heat treatment and after (bottom) 20 h at 120 °C.

**POPOP** was chosen as adequate internal standard due to a similar absorption spectrum to macrocycle **2**. The ratio of the area **POPOP** to the area (*P*)-**2** before heat treatment (0.1380) and after 20 h at 120 °C (0.1350) differ by 2%. No formation of (*M*)-**2** was observed.

## ENANTIOPURE TRANSFORMATION FROM 2 TO 1

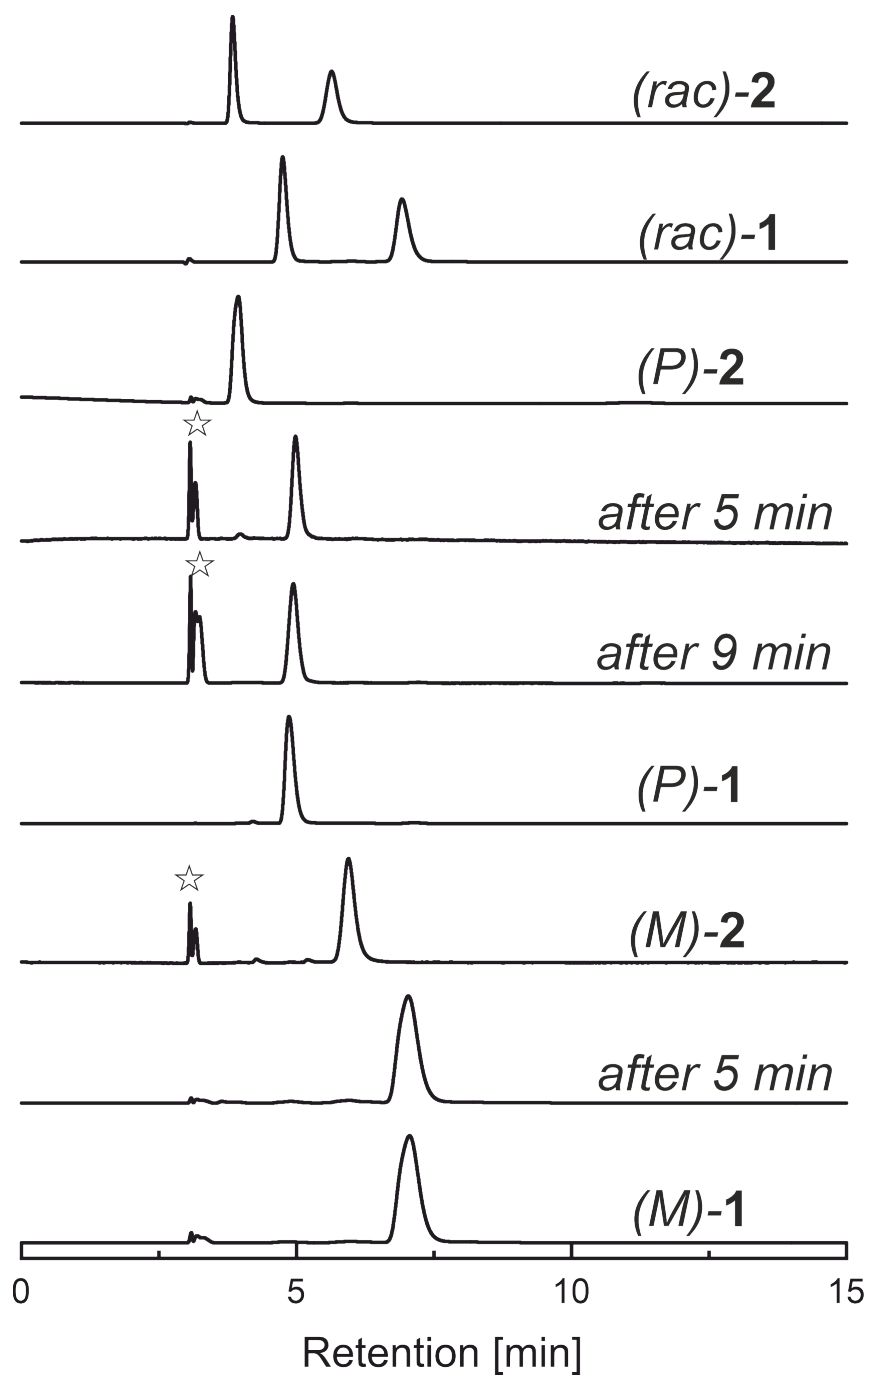

**Figure S2.** Synthesis of (*P*)-1 and (*M*)-1 from enantiomeric pure starting material using analytical chiral HPLC. \* marks the injection peak (more visible at lower concentrations).

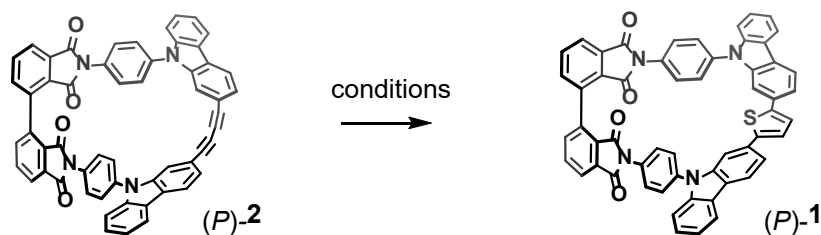

**Scheme S1.** Conditions: S<sub>8</sub>, NaHS, DMF, 25 °C, 10 min

In Figure S1 chromatograms are shown of racemic mixtures of **1** and **2** as well as enantiopure samples of the same compounds. Enantiopure samples of (*P*)-**2** and (*M*)-**2** were submitted to the reaction conditions to (*P*)-**1** and (*M*)-**1**. Aliquots of the reaction mixtures were diluted in CH<sub>2</sub>Cl<sub>2</sub>, filtered and submitted to the analytical chiral HPLC. For the reaction of (*P*)-**2** to (*P*)-**1** traces of (*P*)-**2** were still observed after 5 minutes under reaction conditions. After 9 minutes no starting material was detected anymore. The same experiment was conducted for the reaction of (*M*)-**2** to (*M*)-**1** but no starting material was observed after 5 minutes.

## CIRCULAR DICHROISM MEASUREMENTS:

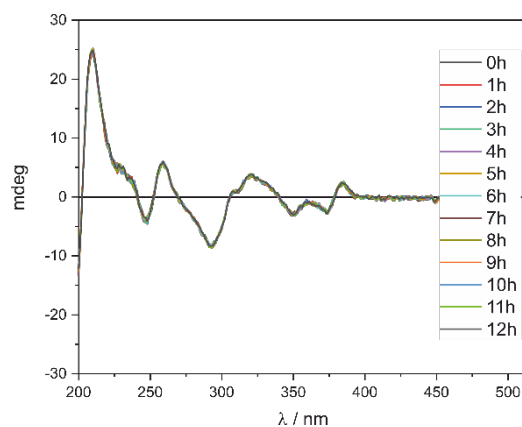

**Figure S3.** Raw data from CD measurements of (*P*)-**2**. Every hour a spectrum was measured for 12h. Concentration is 10<sup>-6</sup> M in acetonitrile and at 25 °C.

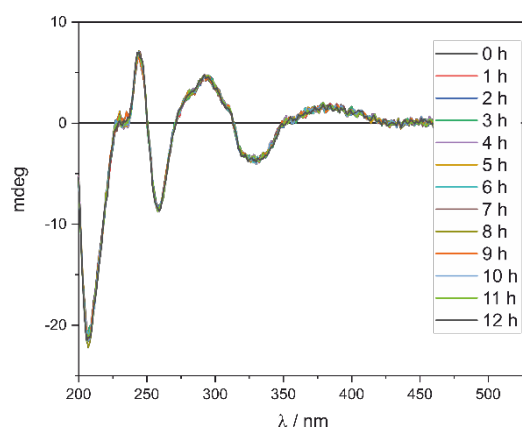

**Figure S4.** Raw data from CD measurements of (*M*)-**1**. Every hour a spectrum was measured for 12 h. Concentration is 10<sup>-6</sup> M in acetonitrile and at 25 °C.

In Figure S2 and Figure S3 spectra of time course experiments are shown. The same sample was measured every hour over a period of 12 h and no change in the CD signal was observed.

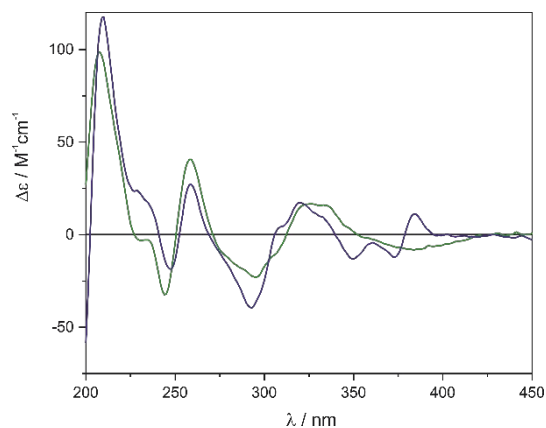

Figure S5: CD spectrum of (*P*)-1 (green) and (*P*)-2 (blue) overlaid. Concentration is  $10^{-6}$  M in acetonitrile and at 25 °C.

Overlaying the CD spectrum of (*P*)-1 and (*P*)-2 (Figure S4) visualizes the similarity of the chiroptical activity of both compounds, the cotton bands are found with similar wavelength.

## NMR AND HR-MS SPECTRA

### 2-bromo-9-(4-nitrophenyl)-9H-carbazole 3:

$^1\text{H}$  NMR (500 MHz,  $\text{CDCl}_3$ ):

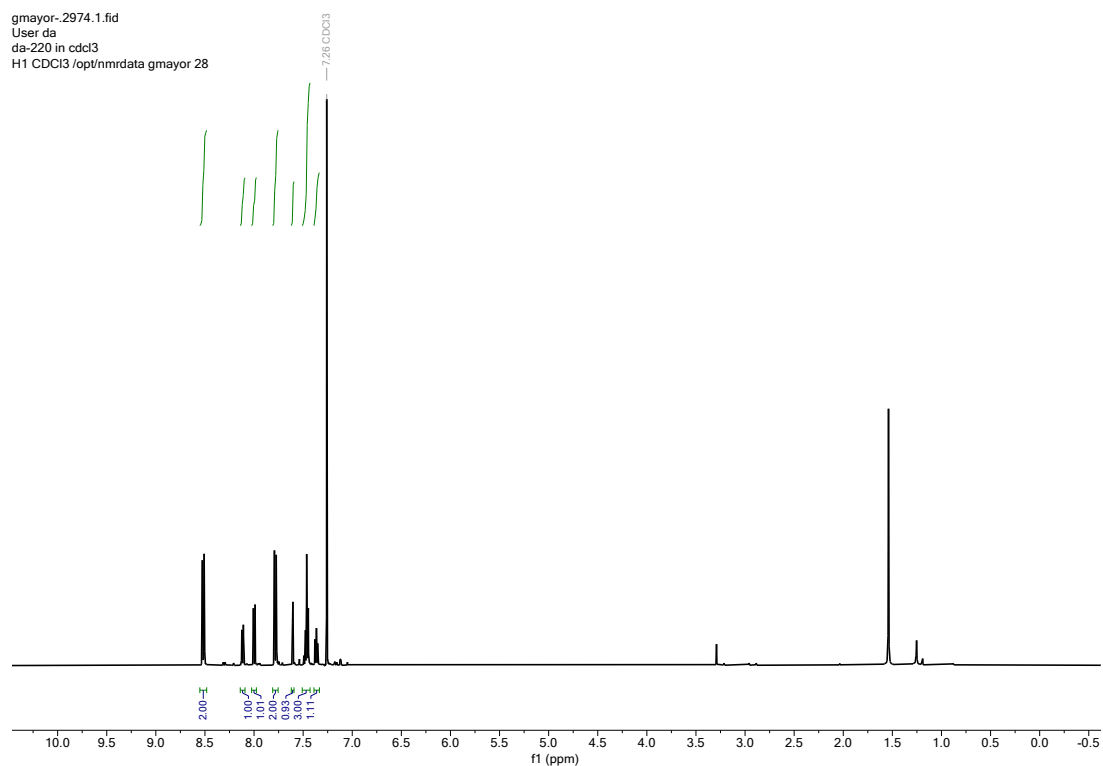

# $^{13}\text{C}$ NMR (126 MHz, $\text{CDCl}_3$ ):

gmayor-2974.4.fid  
User da  
da-220 in cdcl3  
C13cpd CDCl3 /opt/nmrdata gmayor 28

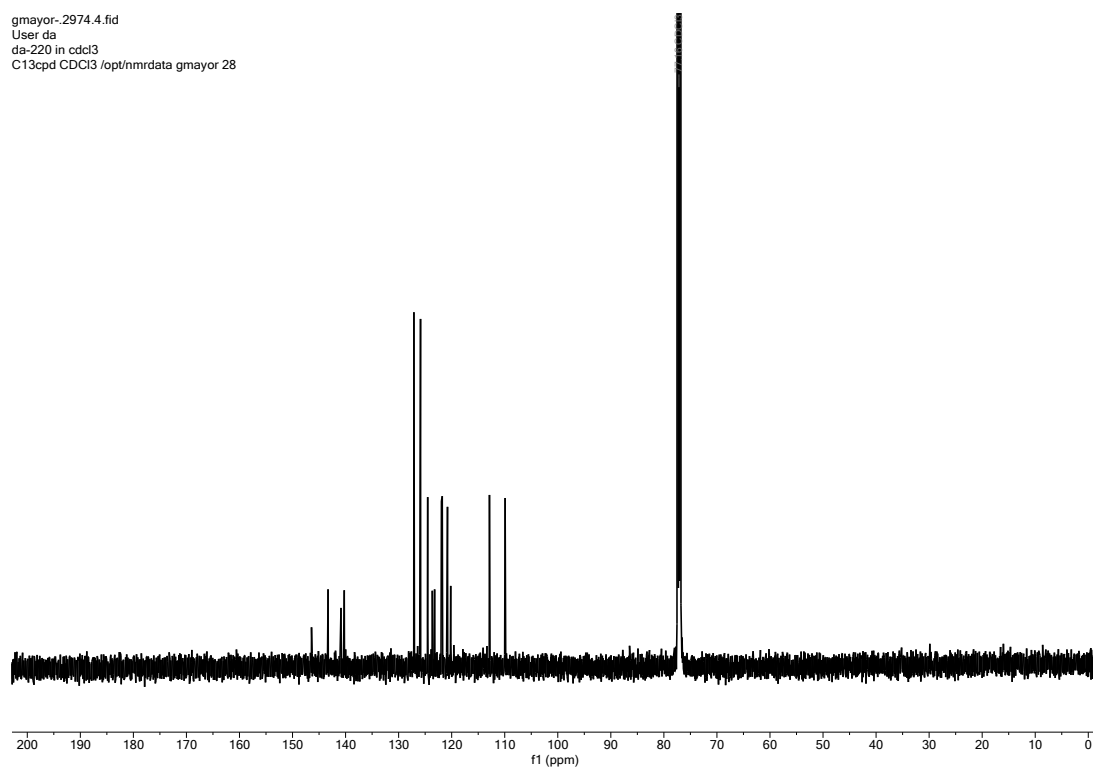

# FT-IR (neat)

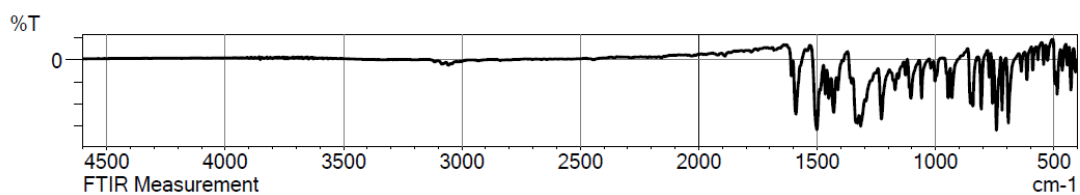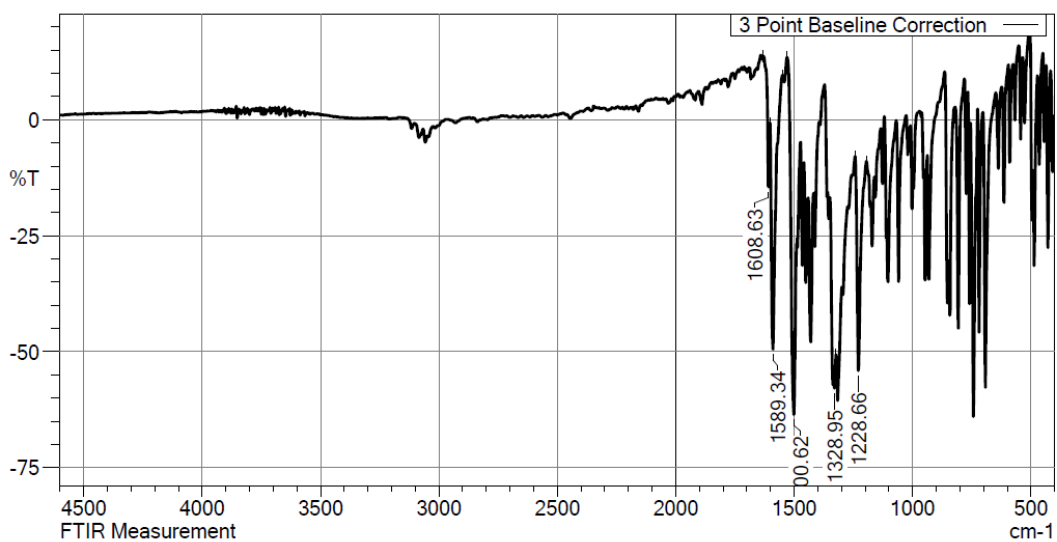



# HRMS (ESIToF):

## High Resolution Mass Spectrometry Report

Sample Name **da-220**  
Comment analyzed in MeOH

Instrument maXis 4G  
Method 22 Direct\_pos\_mid.m

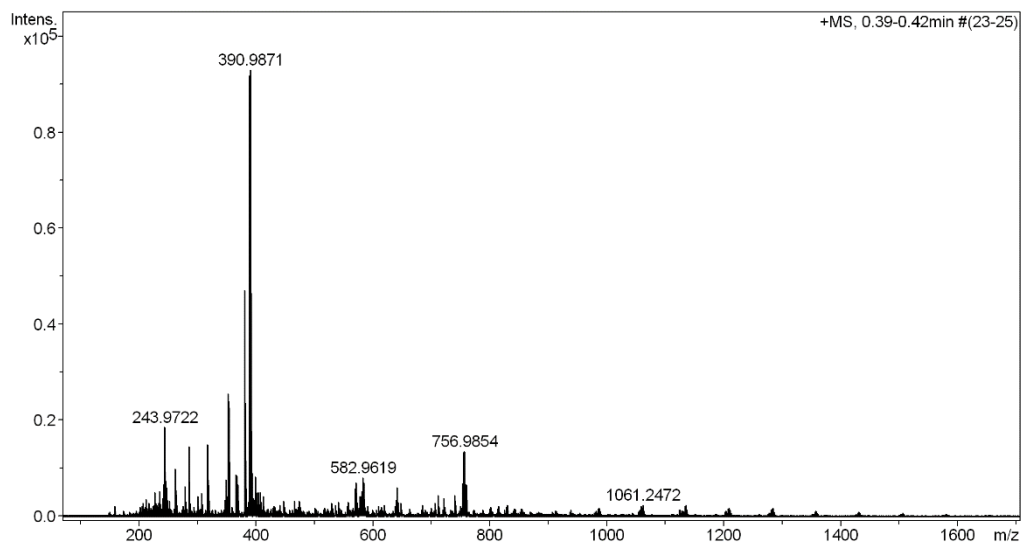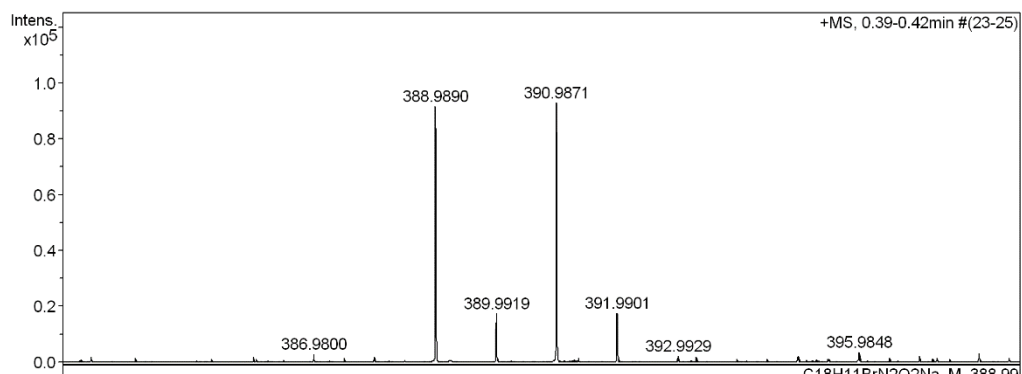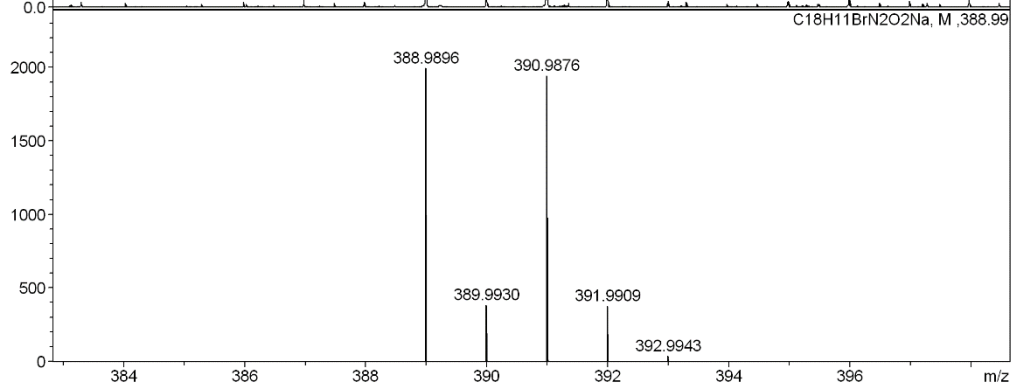

# High Resolution Mass Spectrometry Report

**Measured m/z vs. theoretical m/z**

| Meas. m/z | # | Formula                 | Score  | m/z      | err [mDa] | err [ppm] | mSigma | rdb  | e <sup>-</sup> Conf | z  |
|-----------|---|-------------------------|--------|----------|-----------|-----------|--------|------|---------------------|----|
| 388.9890  | 1 | C 18 H 11 Br N 2 Na O 2 | 100.00 | 388.9896 | 0.6       | 1.5       | 8.9    | 13.5 | even                | 1+ |

**Mass list**

| #  | m/z      | I %   | I     |
|----|----------|-------|-------|
| 1  | 207.0200 | 3.1   | 2845  |
| 2  | 211.9458 | 3.8   | 3556  |
| 3  | 227.0341 | 3.8   | 3510  |
| 4  | 227.5338 | 5.4   | 5048  |
| 5  | 235.0266 | 5.7   | 5288  |
| 6  | 236.0262 | 3.0   | 2827  |
| 7  | 240.0369 | 3.1   | 2883  |
| 8  | 240.5366 | 3.1   | 2900  |
| 9  | 241.0370 | 4.1   | 3854  |
| 10 | 241.5364 | 7.2   | 6686  |
| 11 | 241.9716 | 3.4   | 3153  |
| 12 | 242.5370 | 4.9   | 4532  |
| 13 | 243.9722 | 20.0  | 18569 |
| 14 | 245.9673 | 8.0   | 7431  |
| 15 | 247.0470 | 3.2   | 2994  |
| 16 | 247.5476 | 3.2   | 2955  |
| 17 | 248.0469 | 6.5   | 6087  |
| 18 | 249.0472 | 3.7   | 3418  |
| 19 | 252.9722 | 3.4   | 3197  |
| 20 | 261.9826 | 10.7  | 9937  |
| 21 | 263.9780 | 4.5   | 4192  |
| 22 | 264.1229 | 4.9   | 4546  |
| 23 | 279.2288 | 6.7   | 6256  |
| 24 | 284.9987 | 8.2   | 7665  |
| 25 | 285.1378 | 15.8  | 14664 |
| 26 | 286.1411 | 3.8   | 3552  |
| 27 | 286.9942 | 3.0   | 2814  |
| 28 | 301.1407 | 4.5   | 4144  |
| 29 | 307.2595 | 5.2   | 4852  |
| 30 | 317.0246 | 16.0  | 14899 |
| 31 | 319.0205 | 7.1   | 6572  |
| 32 | 348.0861 | 3.7   | 3444  |
| 33 | 348.5868 | 4.7   | 4360  |
| 34 | 349.0862 | 8.2   | 7598  |
| 35 | 349.5881 | 3.5   | 3295  |
| 36 | 350.0863 | 4.4   | 4118  |
| 37 | 353.2656 | 27.4  | 25537 |
| 38 | 354.2689 | 6.2   | 5780  |
| 39 | 365.9992 | 9.4   | 8737  |
| 40 | 367.0059 | 7.0   | 6559  |
| 41 | 367.9976 | 9.0   | 8412  |
| 42 | 369.0038 | 7.1   | 6572  |
| 43 | 381.2968 | 50.6  | 47056 |
| 44 | 382.3001 | 12.7  | 11814 |
| 45 | 386.9800 | 3.3   | 3077  |
| 46 | 388.9890 | 98.7  | 91833 |
| 47 | 389.9919 | 19.0  | 17649 |
| 48 | 390.9871 | 100.0 | 93066 |
| 49 | 391.9901 | 19.1  | 17746 |
| 50 | 395.9848 | 4.1   | 3858  |
| 51 | 397.9647 | 3.6   | 3361  |
| 52 | 398.9632 | 8.9   | 8273  |
| 53 | 399.4644 | 4.4   | 4101  |
| 54 | 399.9619 | 8.9   | 8274  |
| 55 | 400.4631 | 4.2   | 3944  |
| 56 | 400.9611 | 5.4   | 5068  |
| 57 | 404.9631 | 5.5   | 5086  |
| 58 | 406.9612 | 5.4   | 5053  |
| 59 | 407.9674 | 4.0   | 3746  |
| 60 | 408.9668 | 3.3   | 3030  |
| 61 | 413.2654 | 4.4   | 4135  |
| 62 | 447.3442 | 3.5   | 3260  |

## High Resolution Mass Spectrometry Report

| #   | m/z      | I %  | I     |
|-----|----------|------|-------|
| 63  | 466.5334 | 3.4  | 3181  |
| 64  | 474.0662 | 3.5  | 3219  |
| 65  | 541.1198 | 3.3  | 3045  |
| 66  | 557.5251 | 3.3  | 3030  |
| 67  | 569.9799 | 6.4  | 5931  |
| 68  | 570.4814 | 3.7  | 3469  |
| 69  | 570.9790 | 7.5  | 7008  |
| 70  | 571.4803 | 4.2  | 3934  |
| 71  | 571.9794 | 3.2  | 2974  |
| 72  | 577.9674 | 4.6  | 4284  |
| 73  | 578.4675 | 3.8  | 3568  |
| 74  | 578.9674 | 4.6  | 4244  |
| 75  | 579.4673 | 3.5  | 3269  |
| 76  | 579.9791 | 3.1  | 2871  |
| 77  | 581.9628 | 5.6  | 5249  |
| 78  | 582.4639 | 3.2  | 3005  |
| 79  | 582.9619 | 8.7  | 8097  |
| 80  | 583.4647 | 5.1  | 4730  |
| 81  | 583.9620 | 7.5  | 7013  |
| 82  | 584.4628 | 4.9  | 4563  |
| 83  | 584.9614 | 4.2  | 3922  |
| 84  | 640.0590 | 3.6  | 3323  |
| 85  | 641.0583 | 6.4  | 5931  |
| 86  | 643.0578 | 3.3  | 3047  |
| 87  | 711.5725 | 4.8  | 4453  |
| 88  | 721.5756 | 4.1  | 3798  |
| 89  | 739.6045 | 4.8  | 4474  |
| 90  | 752.9804 | 7.4  | 6865  |
| 91  | 753.4809 | 5.2  | 4878  |
| 92  | 753.9792 | 11.8 | 11019 |
| 93  | 754.4799 | 8.4  | 7857  |
| 94  | 754.9826 | 14.4 | 13441 |
| 95  | 755.4800 | 6.4  | 5965  |
| 96  | 755.9841 | 5.5  | 5090  |
| 97  | 756.9854 | 14.6 | 13585 |
| 98  | 757.9891 | 6.2  | 5736  |
| 99  | 758.9851 | 7.2  | 6671  |
| 100 | 759.9876 | 3.4  | 3118  |

### Acquisition Parameter

|                   |                              |                |                                       |                |              |           |
|-------------------|------------------------------|----------------|---------------------------------------|----------------|--------------|-----------|
| <b>General</b>    | Fore Vacuum                  | 2.60e+000 mBar | High Vacuum                           | 1.33e-007 mBar | Source Type  | ESI       |
|                   | Scan Begin                   | 75 m/z         | Scan End                              | 1700 m/z       | Ion Polarity | Positive  |
| <b>Source</b>     | Set Nebulizer                | 0.4 Bar        | Set Capillary                         | 3600 V         | Set Dry Gas  | 4.0 l/min |
|                   | Set Dry Heater               | 180 °C         | Set End Plate Offset                  | -500 V         |              |           |
| <b>Quadrupole</b> | Set Ion Energy ( MS only )   | 4.0 eV         |                                       |                |              |           |
| <b>Coll. Cell</b> | Collision Energy             | 8.0 eV         | Set Collision Cell RF                 | 350.0 Vpp      |              | 100.0 Vpp |
| <b>Ion Cooler</b> | Set Ion Cooler Transfer Time | 75.0 µs        | Set Ion Cooler Pre Pulse Storage Time |                |              | 10.0 µs   |

# 9-(4-nitrophenyl)-2-((triisopropylsilyl)ethynyl)-carbazole 4:

$^1\text{H}$  NMR (500 MHz,  $\text{CDCl}_3$ ):

gmayor-3760.1.fid  
User gmayor  
DA-266  
H1 CDCl3 /opt/nmrdata gmayor 24

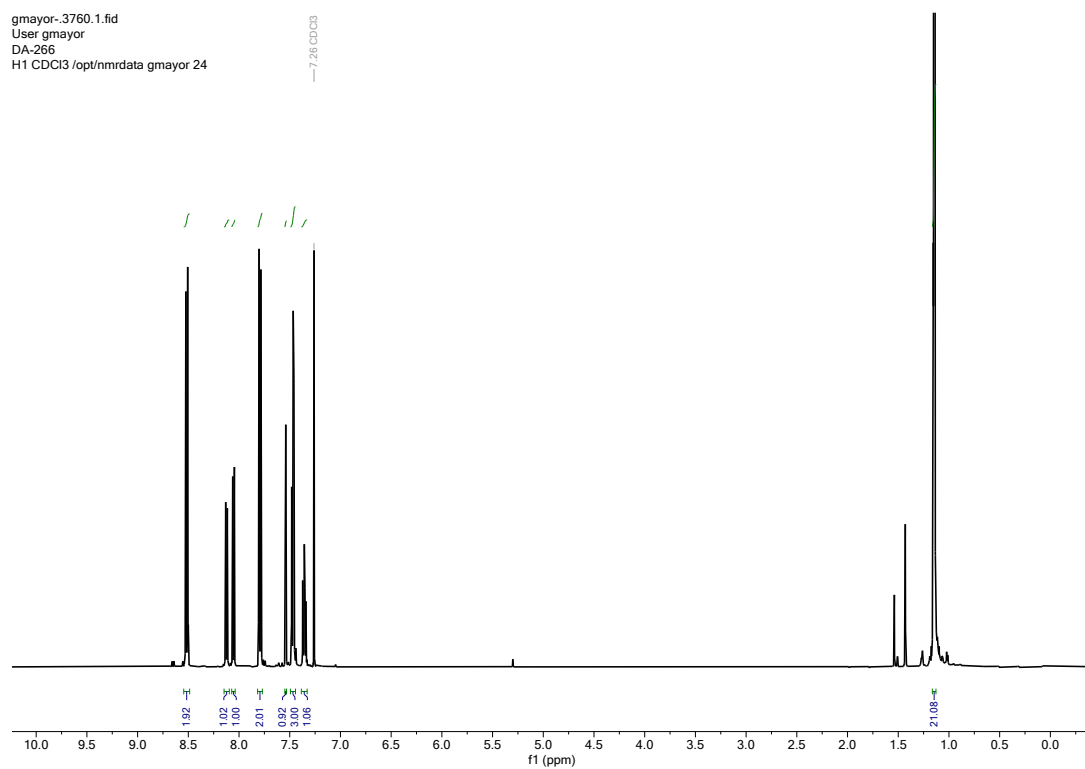

$^{13}\text{C}$  NMR (126 MHz,  $\text{CDCl}_3$ ):

gmayor-3760.2.fid  
User gmayor  
DA-266  
C13cpd CDCl3 /opt/nmrdata gmayor 24

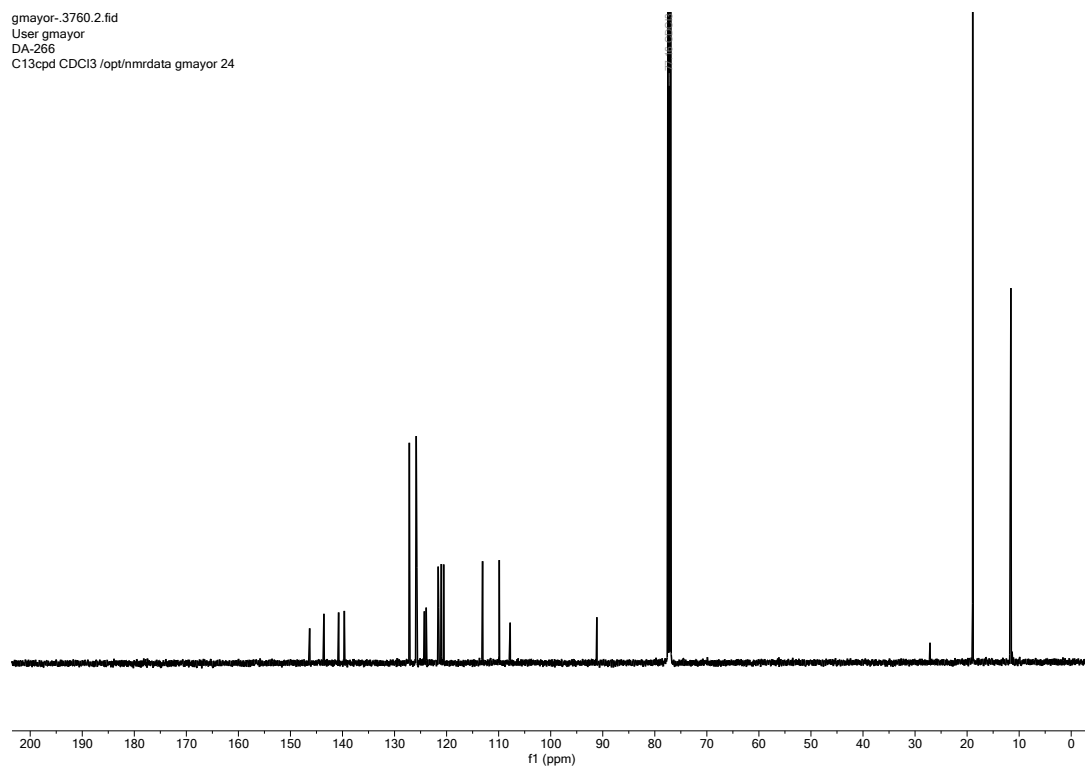

# FT-IR (neat)

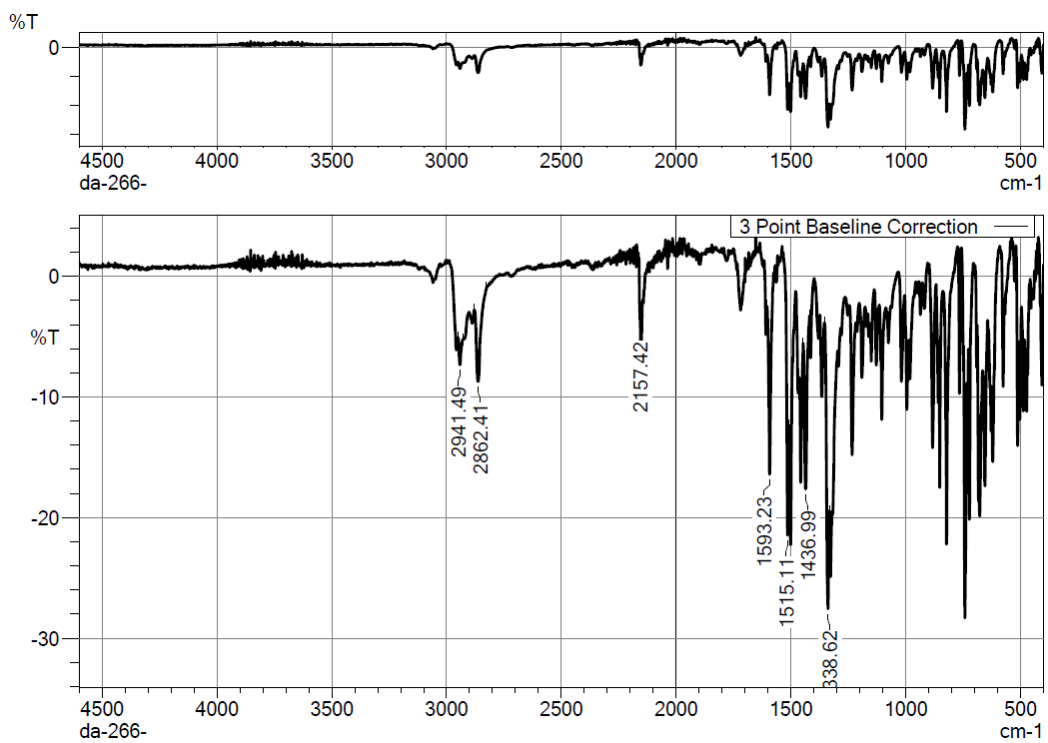

HRMS (ESI-ToF):

## High Resolution Mass Spectrometry Report

Sample Name **da-221**  
Comment

Instrument maXis 4G  
Method ms\_nocolumn\_mid\_pos.m

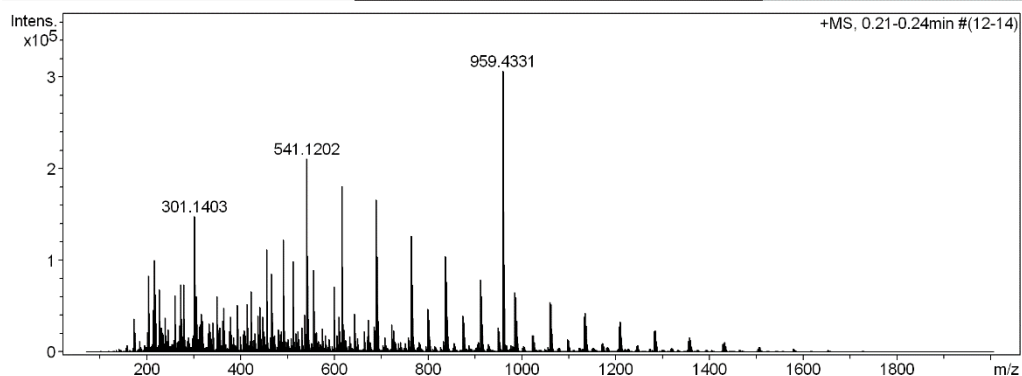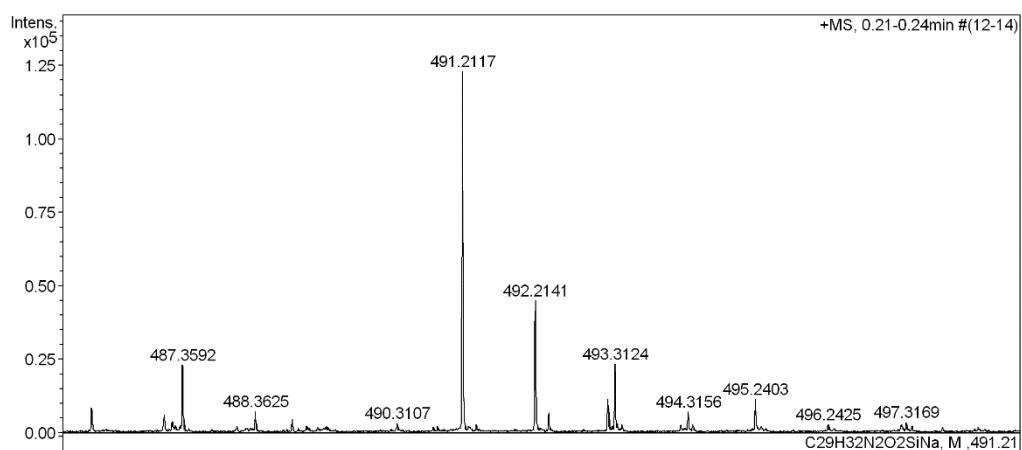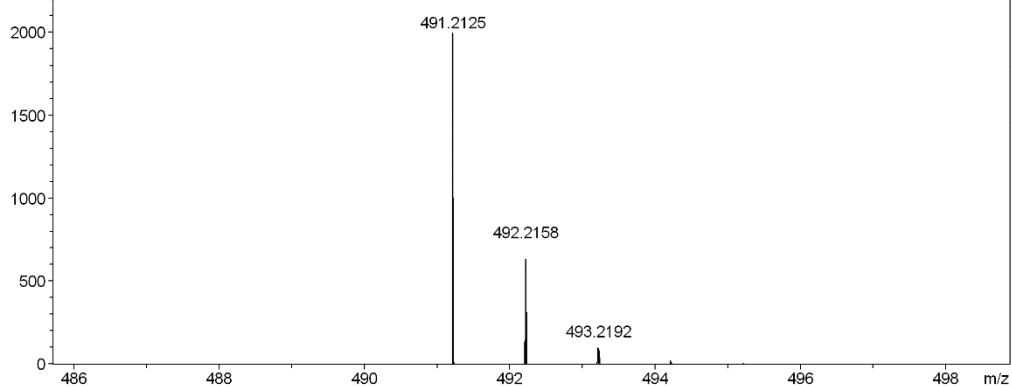

# High Resolution Mass Spectrometry Report

## Measured m/z vs. theoretical m/z

| Meas. m/z | # | Formula                                                            | Score  | m/z      | err [mDa] | err [ppm] | mSigma | rdb  | e <sup>-</sup> Conf | z  |
|-----------|---|--------------------------------------------------------------------|--------|----------|-----------|-----------|--------|------|---------------------|----|
| 491.2117  | 1 | C <sub>29</sub> H <sub>32</sub> N <sub>2</sub> NaO <sub>2</sub> Si | 100.00 | 491.2125 | 0.9       | 1.8       | 7.2    | 15.5 | even                | 1+ |

## Mass list

| #  | m/z      | I %  | I      |
|----|----------|------|--------|
| 1  | 173.0783 | 11.8 | 36134  |
| 2  | 205.0596 | 27.1 | 83070  |
| 3  | 215.1247 | 15.0 | 45875  |
| 4  | 217.1041 | 32.8 | 100425 |
| 5  | 218.2108 | 20.5 | 62873  |
| 6  | 226.9510 | 22.4 | 68788  |
| 7  | 231.0832 | 9.0  | 27459  |
| 8  | 239.0882 | 12.3 | 37729  |
| 9  | 261.1301 | 20.4 | 62372  |
| 10 | 270.9768 | 9.4  | 28914  |
| 11 | 273.1665 | 24.3 | 74349  |
| 12 | 275.1095 | 10.7 | 32710  |
| 13 | 279.0925 | 24.1 | 73913  |
| 14 | 301.0746 | 46.6 | 142805 |
| 15 | 301.1403 | 48.4 | 148293 |
| 16 | 302.0778 | 8.9  | 27260  |
| 17 | 302.1434 | 8.9  | 27270  |
| 18 | 305.1563 | 20.1 | 61520  |
| 19 | 313.2340 | 9.2  | 28053  |
| 20 | 314.2579 | 9.9  | 30367  |
| 21 | 317.1713 | 13.6 | 41569  |
| 22 | 319.1356 | 11.4 | 34931  |
| 23 | 333.1683 | 10.1 | 31095  |
| 24 | 341.2652 | 10.4 | 31811  |
| 25 | 348.9891 | 9.0  | 27551  |
| 26 | 349.1824 | 20.1 | 61548  |
| 27 | 363.1616 | 11.2 | 34326  |
| 28 | 365.1046 | 15.8 | 48530  |
| 29 | 379.1929 | 12.6 | 38549  |
| 30 | 393.2086 | 16.9 | 51695  |
| 31 | 413.2652 | 17.2 | 52676  |
| 32 | 423.2192 | 21.5 | 65899  |
| 33 | 437.2348 | 12.8 | 39310  |
| 34 | 441.2967 | 16.2 | 49567  |
| 35 | 447.3435 | 12.7 | 38992  |
| 36 | 455.1883 | 36.7 | 112486 |
| 37 | 467.1010 | 14.2 | 43378  |
| 38 | 467.2457 | 28.0 | 85954  |
| 39 | 469.3274 | 10.9 | 33365  |
| 40 | 491.2117 | 40.2 | 123117 |
| 41 | 492.2141 | 14.7 | 45201  |
| 42 | 511.2718 | 32.4 | 99306  |
| 43 | 531.3854 | 8.7  | 26572  |
| 44 | 536.1646 | 13.3 | 40613  |
| 45 | 541.1202 | 68.9 | 211087 |
| 46 | 542.1207 | 33.5 | 102632 |
| 47 | 543.1183 | 23.7 | 72753  |
| 48 | 544.1178 | 8.7  | 26647  |
| 49 | 555.2978 | 29.2 | 89569  |
| 50 | 599.3237 | 23.2 | 71247  |
| 51 | 610.1831 | 12.8 | 39204  |
| 52 | 615.1389 | 59.3 | 181645 |
| 53 | 616.1395 | 33.0 | 101169 |
| 54 | 617.1371 | 23.1 | 70802  |
| 55 | 618.1366 | 10.1 | 30869  |
| 56 | 643.3498 | 13.6 | 41803  |
| 57 | 671.2871 | 11.6 | 35668  |
| 58 | 685.4336 | 9.2  | 28242  |
| 59 | 689.1574 | 54.2 | 165970 |
| 60 | 690.1580 | 34.2 | 104730 |
| 61 | 691.1559 | 26.7 | 81744  |
| 62 | 692.1554 | 11.3 | 34738  |

## High Resolution Mass Spectrometry Report

| #   | m/z       | I %   | I      |
|-----|-----------|-------|--------|
| 63  | 722.5244  | 9.8   | 30025  |
| 64  | 763.1758  | 41.5  | 127173 |
| 65  | 764.1763  | 29.6  | 90790  |
| 66  | 765.1742  | 23.9  | 73326  |
| 67  | 766.1739  | 12.0  | 36928  |
| 68  | 800.2661  | 15.2  | 46722  |
| 69  | 801.2673  | 11.7  | 35874  |
| 70  | 802.2657  | 9.8   | 30116  |
| 71  | 837.1938  | 34.2  | 104816 |
| 72  | 838.1946  | 25.1  | 77079  |
| 73  | 839.1924  | 21.9  | 67130  |
| 74  | 840.1912  | 11.5  | 35277  |
| 75  | 874.2844  | 12.9  | 39575  |
| 76  | 875.2853  | 10.6  | 32557  |
| 77  | 876.2830  | 9.0   | 27728  |
| 78  | 911.2117  | 25.8  | 78987  |
| 79  | 912.2127  | 22.7  | 69583  |
| 80  | 913.2106  | 20.1  | 61540  |
| 81  | 914.2097  | 12.0  | 36735  |
| 82  | 959.4331  | 100.0 | 306485 |
| 83  | 960.4358  | 71.2  | 218234 |
| 84  | 961.4364  | 31.4  | 96294  |
| 85  | 962.4370  | 10.6  | 32366  |
| 86  | 985.2299  | 21.4  | 65625  |
| 87  | 986.2305  | 19.7  | 60431  |
| 88  | 987.2289  | 18.6  | 57031  |
| 89  | 988.2282  | 11.4  | 34930  |
| 90  | 1059.2477 | 17.2  | 52603  |
| 91  | 1060.2486 | 17.9  | 54794  |
| 92  | 1061.2469 | 17.3  | 52871  |
| 93  | 1062.2464 | 10.7  | 32835  |
| 94  | 1133.2653 | 12.7  | 38861  |
| 95  | 1134.2661 | 13.7  | 42047  |
| 96  | 1135.2648 | 13.9  | 42468  |
| 97  | 1136.2639 | 9.4   | 28796  |
| 98  | 1207.2828 | 9.3   | 28541  |
| 99  | 1208.2836 | 10.7  | 32875  |
| 100 | 1209.2825 | 10.5  | 32301  |

### Acquisition Parameter

|                   |                              |                |                                       |                |              |           |
|-------------------|------------------------------|----------------|---------------------------------------|----------------|--------------|-----------|
| <b>General</b>    | Fore Vacuum                  | 2.39e+000 mBar | High Vacuum                           | 1.37e-007 mBar | Source Type  | ESI       |
|                   | Scan Begin                   | 75 m/z         | Scan End                              | 2000 m/z       | Ion Polarity | Positive  |
| <b>Source</b>     | Set Nebulizer                | 2.0 Bar        | Set Capillary                         | 4500 V         | Set Dry Gas  | 8.0 l/min |
|                   | Set Dry Heater               | 200 °C         | Set End Plate Offset                  | -500 V         |              |           |
| <b>Quadrupole</b> | Set Ion Energy ( MS only )   | 4.0 eV         |                                       |                |              |           |
| <b>Coll. Cell</b> | Collision Energy             | 8.0 eV         | Set Collision Cell RF                 | 600.0 Vpp      |              | 100.0 Vpp |
| <b>Ion Cooler</b> | Set Ion Cooler Transfer Time | 75.0 µs        | Set Ion Cooler Pre Pulse Storage Time |                |              | 10.0 µs   |



# 4-(2-((triisopropylsilyl)ethynyl)-carbazol-9-yl)aniline 5:

$^1\text{H}$  NMR (500 MHz,  $\text{CD}_2\text{Cl}_2$ ):

adaddio\_086.1.fid  
Kuerzel DA  
Gruppe Mayor  
Nummer 234  
wu

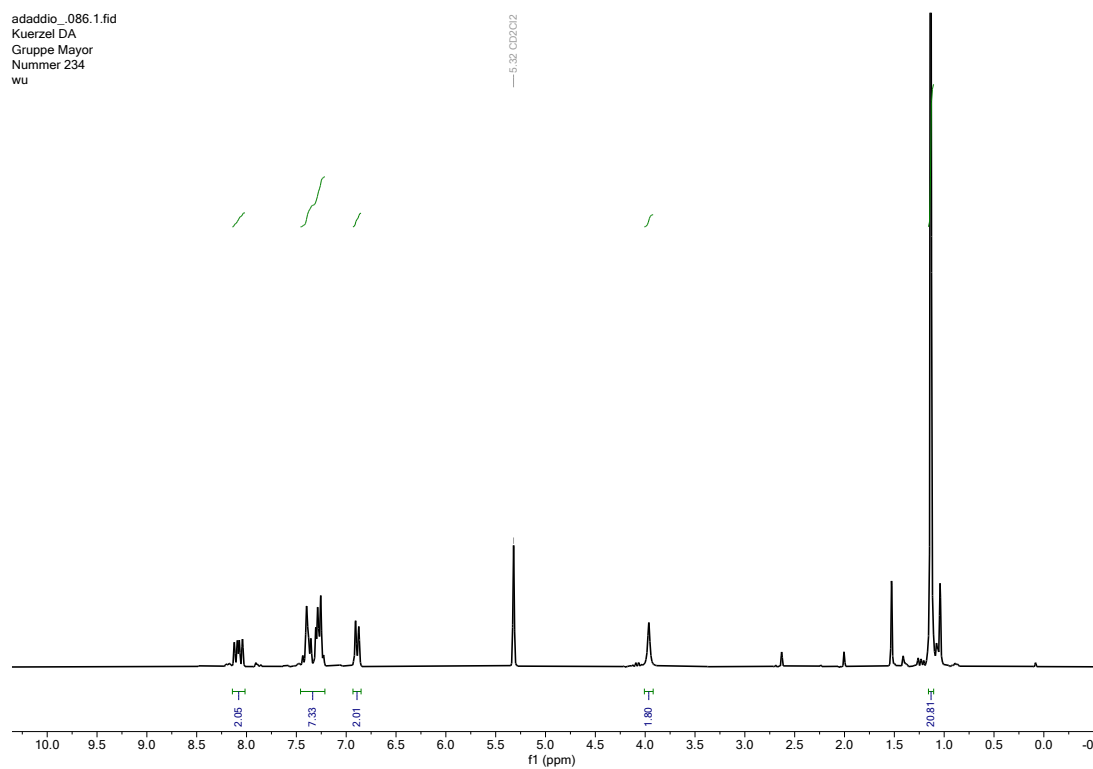

# HRMS (ESI-ToF):

## High Resolution Mass Spectrometry Report

Sample Name **da-222**  
Comment

Instrument maXis 4G  
Method ms\_nocolumn\_low\_pos.m

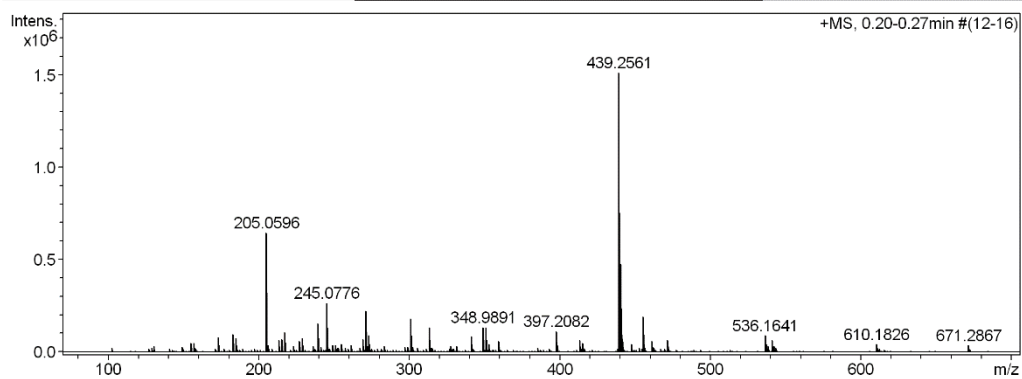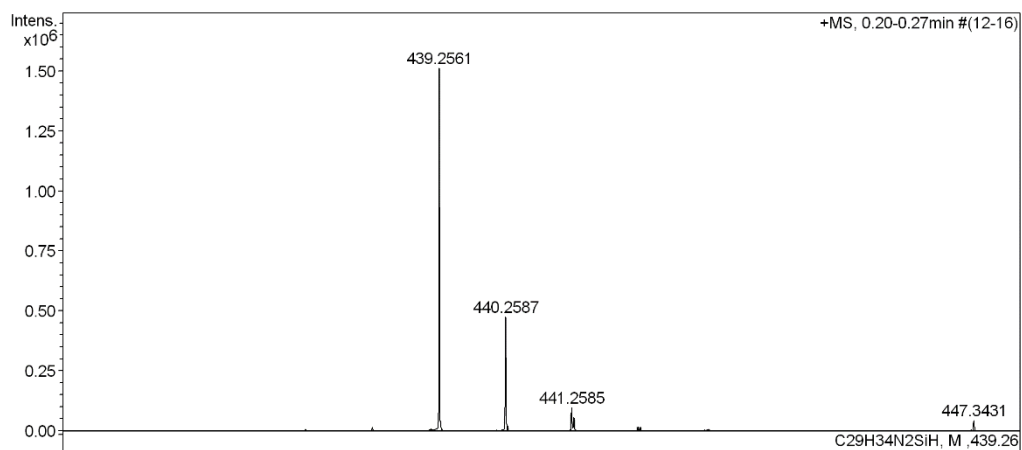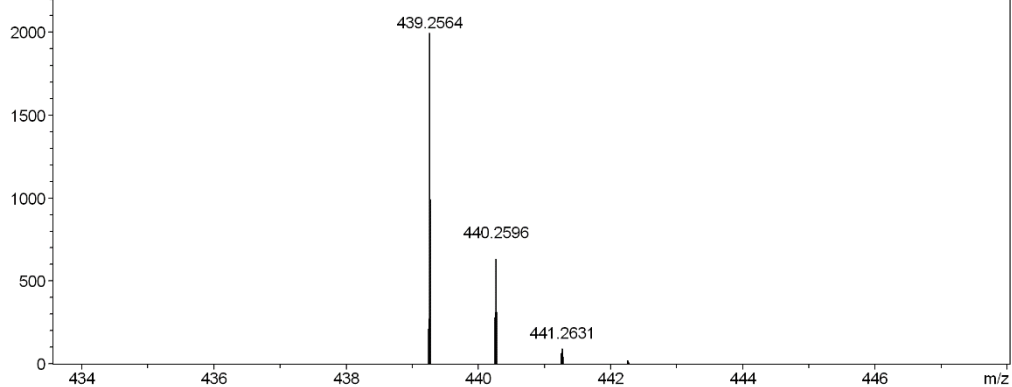

## High Resolution Mass Spectrometry Report

### Measured m/z vs. theoretical m/z

| Meas. m/z | # | Formula | Score | m/z | err [mDa] | err [ppm] | mSigma | rdb | e <sup>-</sup> | Conf | z |
|-----------|---|---------|-------|-----|-----------|-----------|--------|-----|----------------|------|---|
|-----------|---|---------|-------|-----|-----------|-----------|--------|-----|----------------|------|---|

### Mass list

| # | m/z      | I %   | I    |
|---|----------|-------|------|
| 1 | 439.2564 | 100.0 | 2000 |
| 2 | 440.2534 | 0.7   | 15   |
| 3 | 440.2596 | 36.8  | 737  |
| 4 | 441.2533 | 3.6   | 72   |
| 5 | 441.2631 | 6.5   | 130  |
| 6 | 442.2566 | 1.1   | 22   |
| 7 | 442.2665 | 0.7   | 15   |
| 8 | 443.2600 | 0.2   | 4    |

### Acquisition Parameter

|                   |                              |                |                                       |                |              |           |
|-------------------|------------------------------|----------------|---------------------------------------|----------------|--------------|-----------|
| <b>General</b>    | Fore Vacuum                  | 2.48e+000 mBar | High Vacuum                           | 1.39e-007 mBar | Source Type  | ESI       |
|                   | Scan Begin                   | 75 m/z         | Scan End                              | 700 m/z        | Ion Polarity | Positive  |
| <b>Source</b>     | Set Nebulizer                | 2.0 Bar        | Set Capillary                         | 4500 V         | Set Dry Gas  | 8.0 l/min |
|                   | Set Dry Heater               | 200 °C         | Set End Plate Offset                  | -500 V         |              |           |
| <b>Quadrupole</b> | Set Ion Energy ( MS only )   | 4.0 eV         |                                       |                |              |           |
| <b>Coll. Cell</b> | Collision Energy             | 8.0 eV         | Set Collision Cell RF                 | 350.0 Vpp      | 55.0 Vpp     |           |
| <b>Ion Cooler</b> | Set Ion Cooler Transfer Time | 55.0 µs        | Set Ion Cooler Pre Pulse Storage Time | 7.0 µs         |              |           |

# Monomer 6:

## <sup>1</sup>H NMR (500 MHz, THF-d8):

gmayor-3961.1.fid  
User gmayor  
da-230 charac  
H1 THF /opt/nmrdata gmayor 50

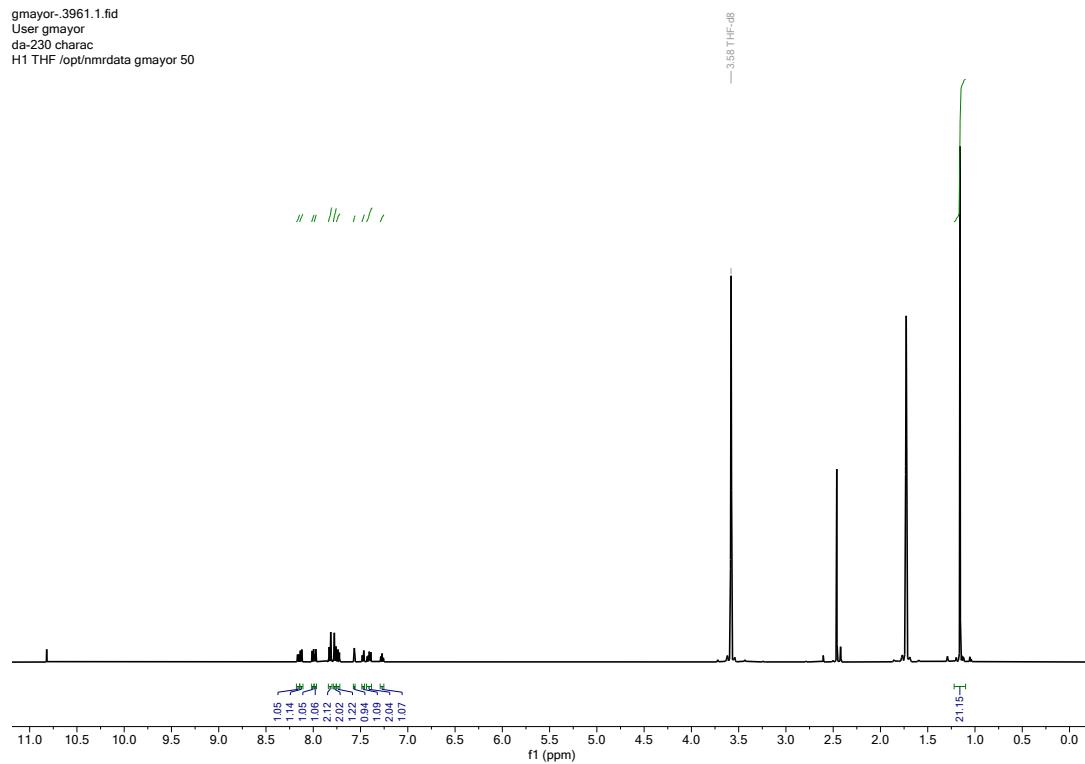

## <sup>13</sup>C NMR (126 MHz, THF-d8):

gmayor-3961.2.fid  
User gmayor  
da-230 charac  
C13cpd THF /opt/nmrdata gmayor 50

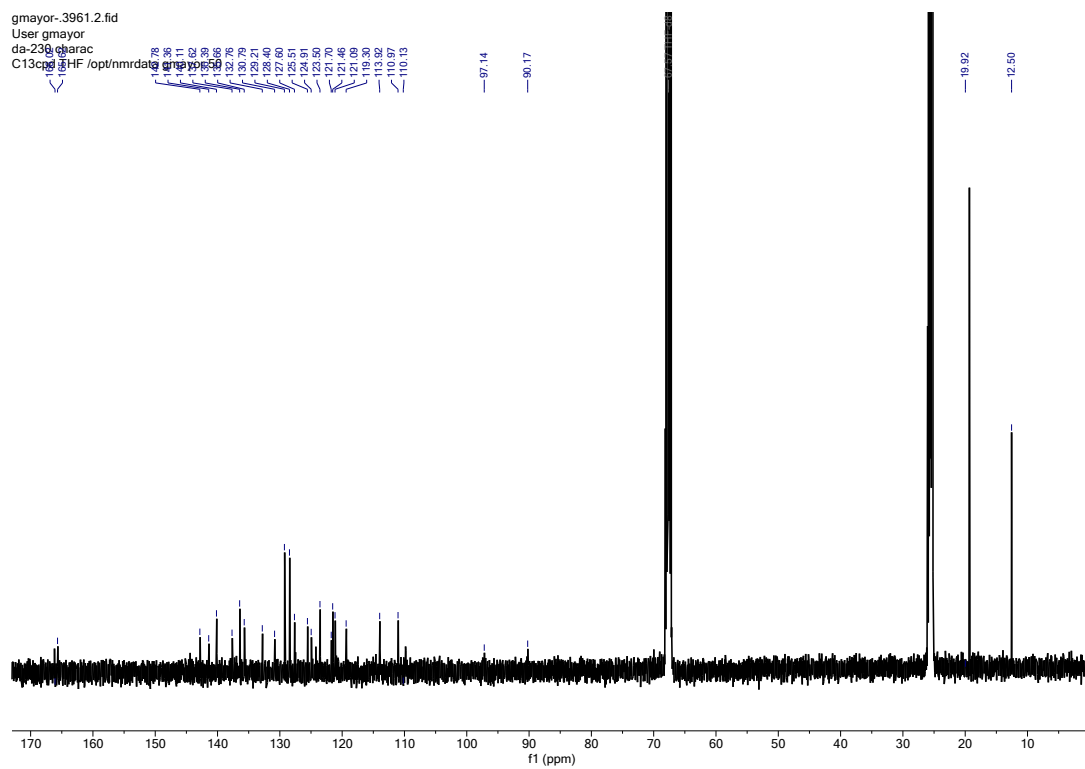

# FT-IR (neat)

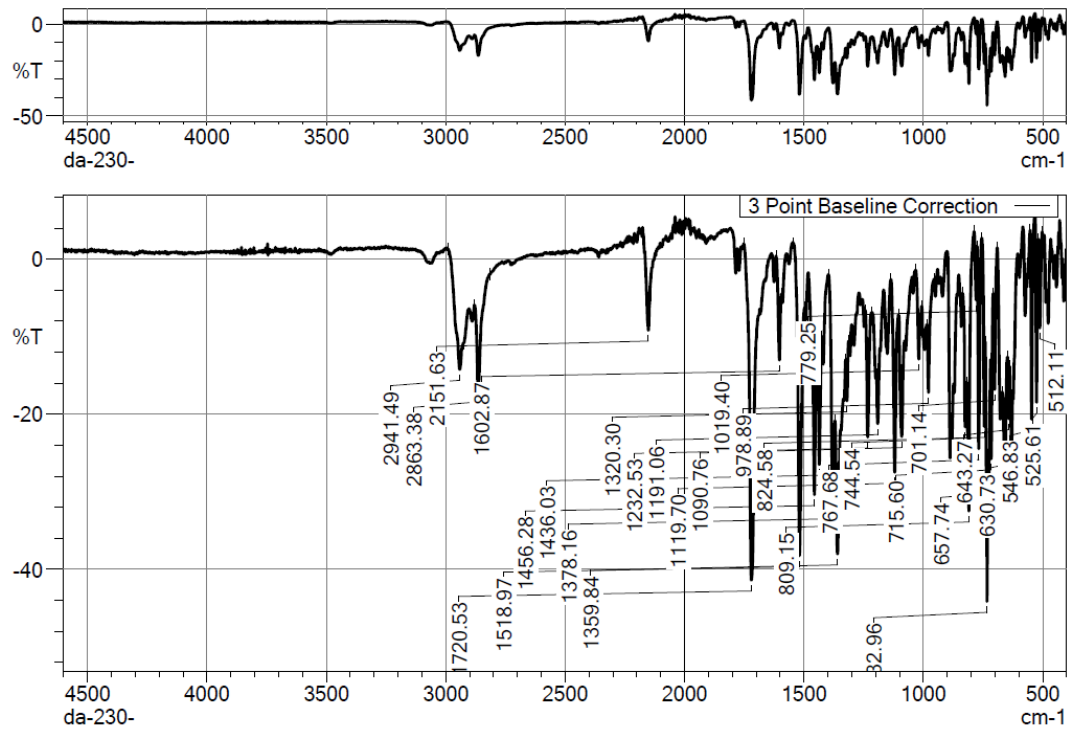

# HRMS (ESI-ToF):

## High Resolution Mass Spectrometry Report

Sample Name **D'A-230** Instrument **maXis 4G**  
Comment **dissolved inDCM, analyzed in MeOH** Method **22 Direct\_pos\_mid.m**

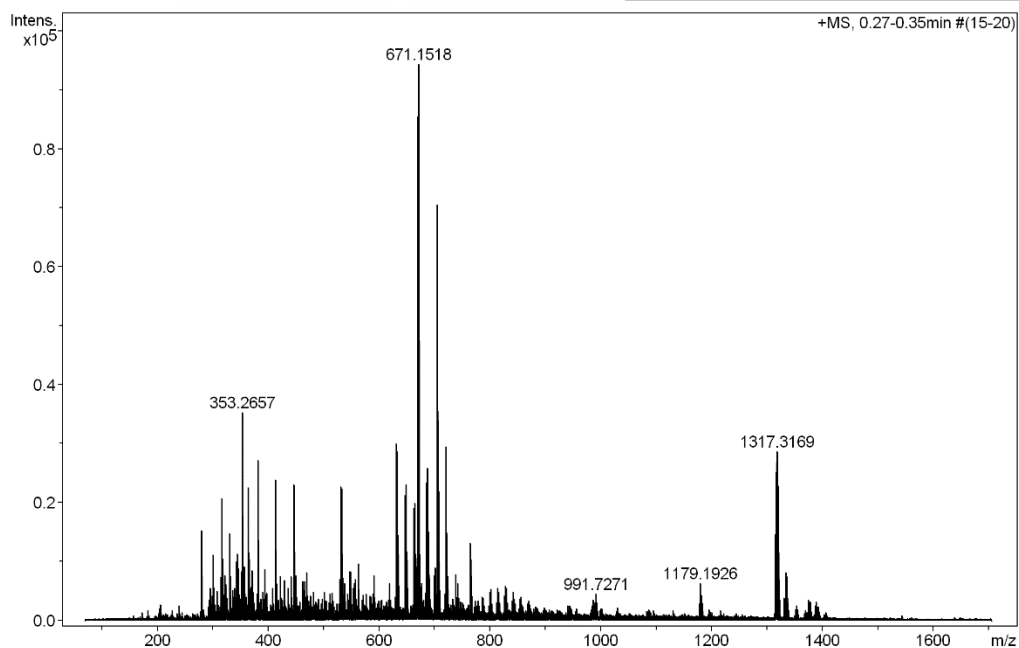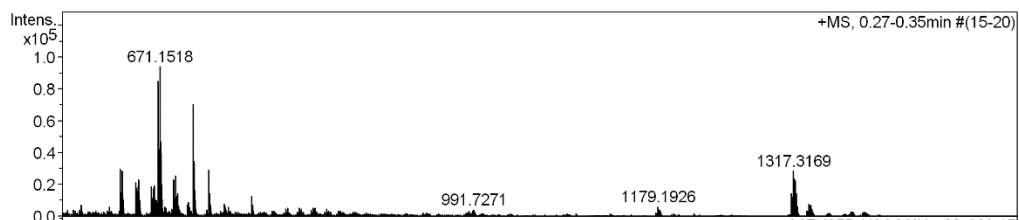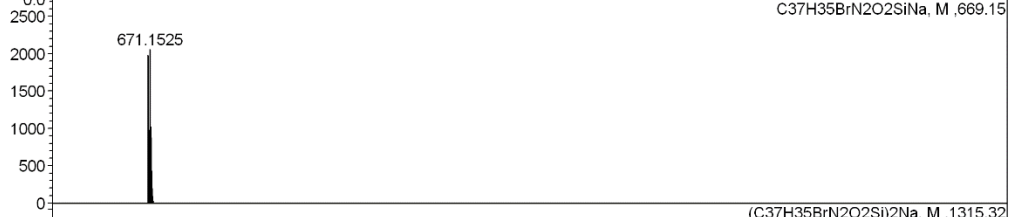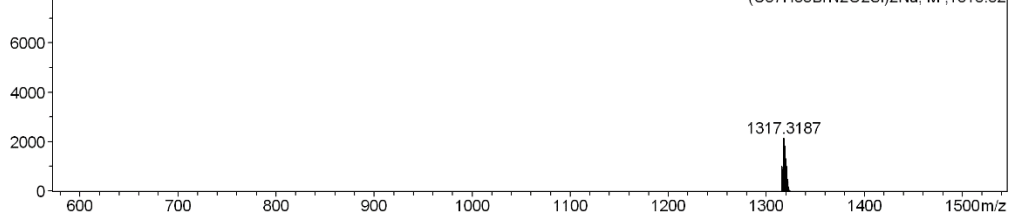

# High Resolution Mass Spectrometry Report

## Measured m/z vs. theoretical m/z

| Meas. m/z | # | Formula                        | Score  | m/z       | err [mDa] | err [ppm] | mSigma | rdb  | e <sup>-</sup> Conf | z  |
|-----------|---|--------------------------------|--------|-----------|-----------|-----------|--------|------|---------------------|----|
| 669.1530  | 1 | C 37 H 35 Br N 2 Na O 2 Si     | 100.00 | 669.1543  | 1.3       | 2.0       | 5.9    | 21.5 | even                | 1+ |
| 1315.3173 | 1 | C 74 H 70 Br 2 N 4 Na O 4 Si 2 | 100.00 | 1315.3195 | 2.2       | 1.7       | 41.1   | 42.5 | even                |    |

## Mass list

| #  | m/z      | I %  | I     |
|----|----------|------|-------|
| 1  | 279.0929 | 16.2 | 15319 |
| 2  | 279.2293 | 8.1  | 7676  |
| 3  | 301.0749 | 11.8 | 11173 |
| 4  | 315.1922 | 7.8  | 7395  |
| 5  | 317.0513 | 21.9 | 20725 |
| 6  | 319.2237 | 8.3  | 7857  |
| 7  | 321.2394 | 8.1  | 7644  |
| 8  | 331.1875 | 15.7 | 14810 |
| 9  | 343.0632 | 10.7 | 10100 |
| 10 | 344.0626 | 12.0 | 11360 |
| 11 | 347.2914 | 9.4  | 8866  |
| 12 | 352.0683 | 8.8  | 8313  |
| 13 | 353.0678 | 11.2 | 10616 |
| 14 | 353.2657 | 37.4 | 35340 |
| 15 | 354.2689 | 7.9  | 7434  |
| 16 | 357.1463 | 9.7  | 9156  |
| 17 | 363.5763 | 23.2 | 21882 |
| 18 | 364.0777 | 11.3 | 10681 |
| 19 | 364.5758 | 24.0 | 22675 |
| 20 | 365.0769 | 11.1 | 10436 |
| 21 | 371.1623 | 9.0  | 8500  |
| 22 | 381.2970 | 28.8 | 27153 |
| 23 | 382.3000 | 7.4  | 6972  |
| 24 | 393.2969 | 9.3  | 8761  |
| 25 | 413.2653 | 25.4 | 23946 |
| 26 | 421.3281 | 8.1  | 7620  |
| 27 | 429.2391 | 7.3  | 6887  |
| 28 | 441.2969 | 7.9  | 7464  |
| 29 | 447.3437 | 24.5 | 23114 |
| 30 | 448.3473 | 7.4  | 7020  |
| 31 | 449.3619 | 7.6  | 7213  |
| 32 | 463.3175 | 7.2  | 6761  |
| 33 | 465.3687 | 7.1  | 6737  |
| 34 | 469.3277 | 8.6  | 8159  |
| 35 | 529.4939 | 7.4  | 6986  |
| 36 | 531.0306 | 24.0 | 22707 |
| 37 | 532.0339 | 8.0  | 7557  |
| 38 | 533.0285 | 23.7 | 22399 |
| 39 | 534.0318 | 7.7  | 7313  |
| 40 | 547.0042 | 8.8  | 8351  |
| 41 | 549.0024 | 8.9  | 8358  |
| 42 | 557.5246 | 7.4  | 7032  |
| 43 | 562.2381 | 10.3 | 9692  |
| 44 | 591.4941 | 8.2  | 7735  |
| 45 | 619.5253 | 6.8  | 6419  |
| 46 | 631.0855 | 31.8 | 30021 |
| 47 | 632.0888 | 13.0 | 12319 |
| 48 | 633.0856 | 30.4 | 28675 |
| 49 | 634.0882 | 11.9 | 11266 |
| 50 | 647.1708 | 22.6 | 21298 |
| 51 | 648.1733 | 10.6 | 9965  |
| 52 | 649.1694 | 24.5 | 23122 |
| 53 | 650.1719 | 10.9 | 10313 |
| 54 | 663.0576 | 20.3 | 19161 |
| 55 | 663.4521 | 8.9  | 8391  |
| 56 | 664.0607 | 8.8  | 8312  |
| 57 | 665.0579 | 21.1 | 19943 |
| 58 | 666.0602 | 8.7  | 8255  |
| 59 | 667.1444 | 11.4 | 10761 |
| 60 | 667.1784 | 7.2  | 6786  |
| 61 | 667.6451 | 9.7  | 9178  |

## High Resolution Mass Spectrometry Report

| #   | m/z       | I %   | I     |
|-----|-----------|-------|-------|
| 62  | 668.1443  | 9.4   | 8907  |
| 63  | 668.6447  | 6.9   | 6561  |
| 64  | 669.1530  | 90.6  | 85535 |
| 65  | 670.1558  | 41.9  | 39523 |
| 66  | 671.1518  | 100.0 | 94424 |
| 67  | 672.1542  | 42.3  | 39940 |
| 68  | 673.1549  | 12.1  | 11397 |
| 69  | 685.1270  | 24.9  | 23499 |
| 70  | 685.4339  | 19.2  | 18117 |
| 71  | 686.1296  | 12.1  | 11463 |
| 72  | 686.4371  | 9.1   | 8615  |
| 73  | 687.1255  | 27.4  | 25831 |
| 74  | 687.1616  | 14.5  | 13687 |
| 75  | 688.1278  | 12.2  | 11528 |
| 76  | 688.1634  | 7.3   | 6934  |
| 77  | 689.1614  | 16.0  | 15087 |
| 78  | 690.1636  | 7.6   | 7137  |
| 79  | 699.5936  | 8.2   | 7699  |
| 80  | 700.6250  | 9.6   | 9091  |
| 81  | 705.5812  | 74.8  | 70583 |
| 82  | 706.5843  | 36.1  | 34084 |
| 83  | 707.5848  | 11.3  | 10712 |
| 84  | 721.1472  | 14.9  | 14049 |
| 85  | 721.5721  | 31.3  | 29515 |
| 86  | 722.5751  | 15.5  | 14677 |
| 87  | 737.5516  | 8.3   | 7851  |
| 88  | 764.5723  | 14.0  | 13190 |
| 89  | 765.5753  | 8.1   | 7634  |
| 90  | 1179.1926 | 6.8   | 6376  |
| 91  | 1315.3173 | 15.5  | 14654 |
| 92  | 1316.3195 | 13.4  | 12634 |
| 93  | 1317.3169 | 30.4  | 28681 |
| 94  | 1318.3196 | 25.3  | 23935 |
| 95  | 1319.3167 | 24.4  | 22999 |
| 96  | 1320.3180 | 15.6  | 14746 |
| 97  | 1321.3189 | 7.5   | 7036  |
| 98  | 1333.2905 | 8.6   | 8124  |
| 99  | 1334.2948 | 7.4   | 6970  |
| 100 | 1335.2945 | 8.0   | 7573  |

### Acquisition Parameter

|                   |                              |                |                                       |                |              |           |
|-------------------|------------------------------|----------------|---------------------------------------|----------------|--------------|-----------|
| <b>General</b>    | Fore Vacuum                  | 2.48e+000 mBar | High Vacuum                           | 1.21e-007 mBar | Source Type  | ESI       |
|                   | Scan Begin                   | 75 m/z         | Scan End                              | 1700 m/z       | Ion Polarity | Positive  |
| <b>Source</b>     | Set Nebulizer                | 0.4 Bar        | Set Capillary                         | 3600 V         | Set Dry Gas  | 4.0 l/min |
|                   | Set Dry Heater               | 180 °C         | Set End Plate Offset                  | -500 V         |              |           |
| <b>Quadrupole</b> | Set Ion Energy ( MS only )   | 4.0 eV         |                                       |                |              |           |
| <b>Coll. Cell</b> | Collision Energy             | 8.0 eV         | Set Collision Cell RF                 | 350.0 Vpp      |              | 100.0 Vpp |
| <b>Ion Cooler</b> | Set Ion Cooler Transfer Time | 75.0 µs        | Set Ion Cooler Pre Pulse Storage Time |                |              | 10.0 µs   |



# Dimer 7:

## <sup>1</sup>H NMR (500 MHz, THF-d8):

gmayor-3254.1.fid  
User gmayor  
da-238  
H1 THF /opt/nmrdata gmayor 43

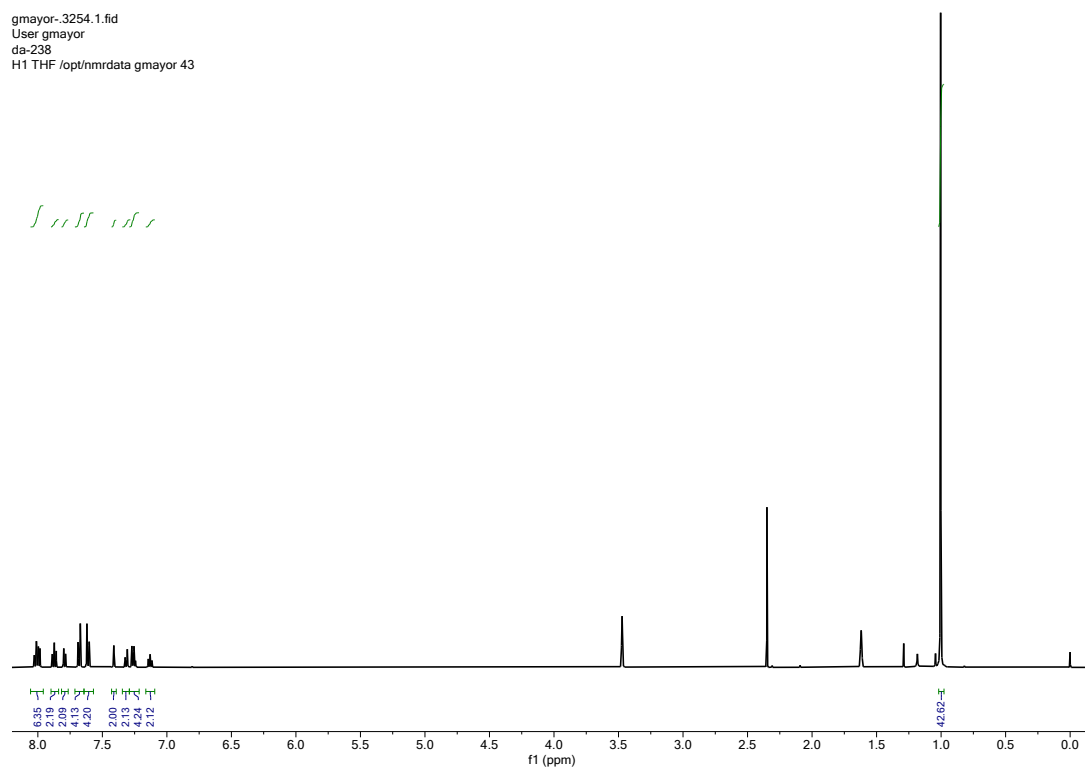

## <sup>13</sup>C NMR (126 MHz, THF-d8):

gmayor-3254.2.fid  
User gmayor  
da-238  
C13cpd THF /opt/nmrdata gmayor 43

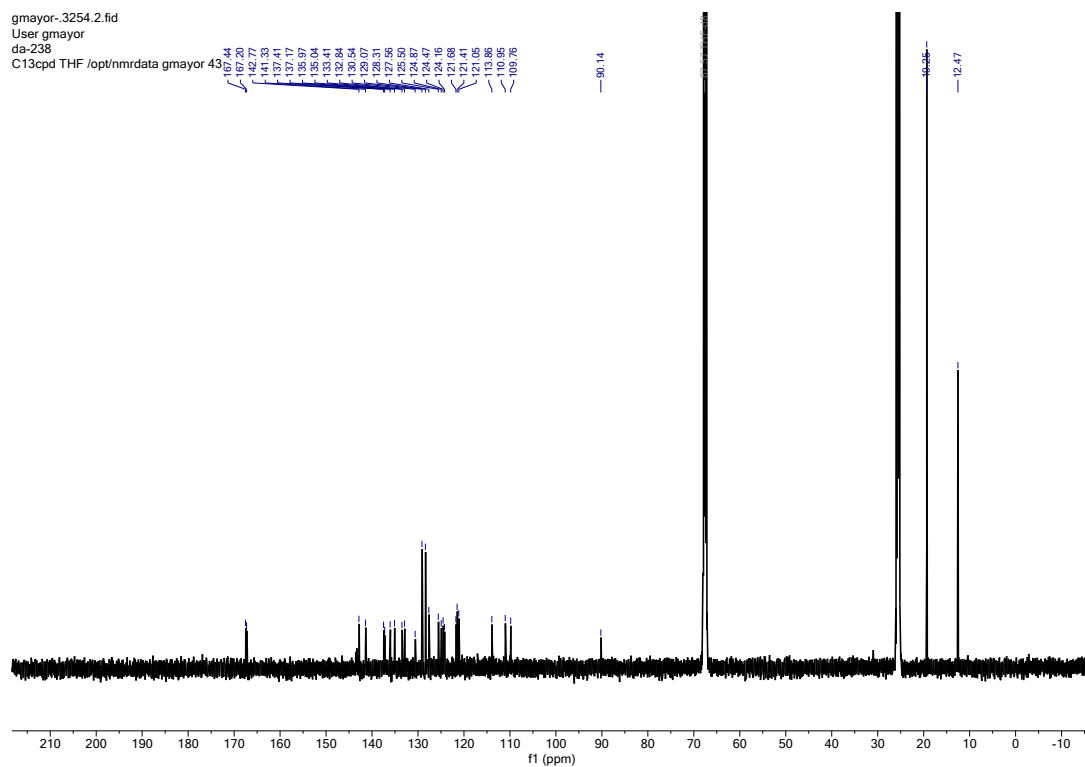

# HRMS (MALDI-ToF):

BSOL001580 Adriano D'Addio/ - DA-337-M3-P4 - DCM - DCTB+Ag 1:10:1

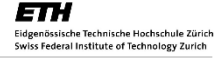

## Acquisition Parameter

|                      |                                                      |                             |                     |
|----------------------|------------------------------------------------------|-----------------------------|---------------------|
| Method:              | MALDI_MS_POS_300-2600_2M_16AvScans                   | Acquisition Date:           | 17.12.2021 15:09:38 |
| File Name:           | D:\Data\ETH Data\BSOL001580\BSOL001580_0_G7_000001.d | Operator:                   | Daniel Wirz         |
| Source:              | Dual (MALDI/ESI)                                     | Polarity:                   | Positive            |
| Broadband Low Mass:  | 303.1 m/z                                            | Nebulizer Gas:              | 1.3 bar             |
| Broadband High Mass: | 2600.0 m/z                                           | Drying Gas Flow Rate:       | 3.7 L/min           |
| No. of Cell Fills:   | 1                                                    | Capillary:                  | 4500.0 V            |
| Apodization:         | Full-Sine                                            | Drying Gas:                 | 200.0 °C            |
|                      |                                                      | Time of Flight to Detector: | 0.001 sec           |
|                      |                                                      | Temperature:                |                     |

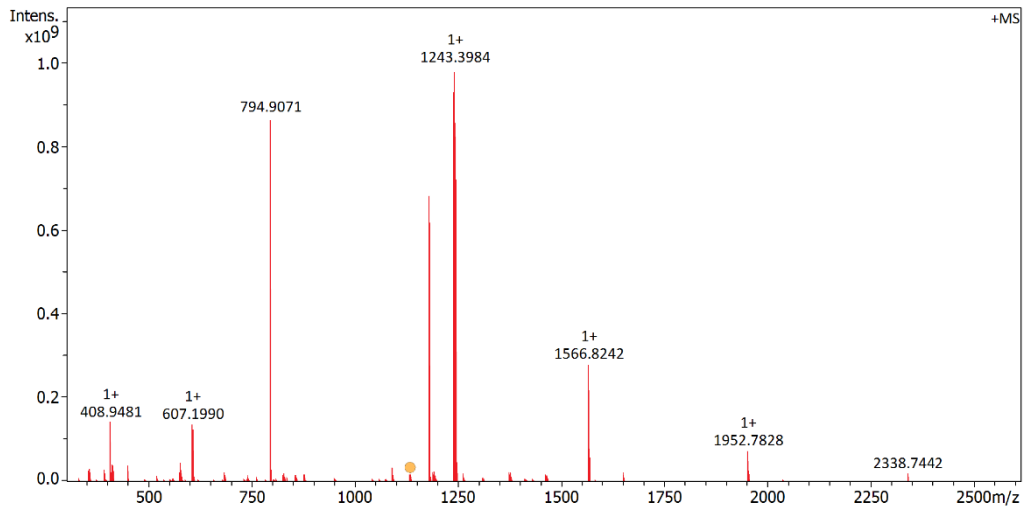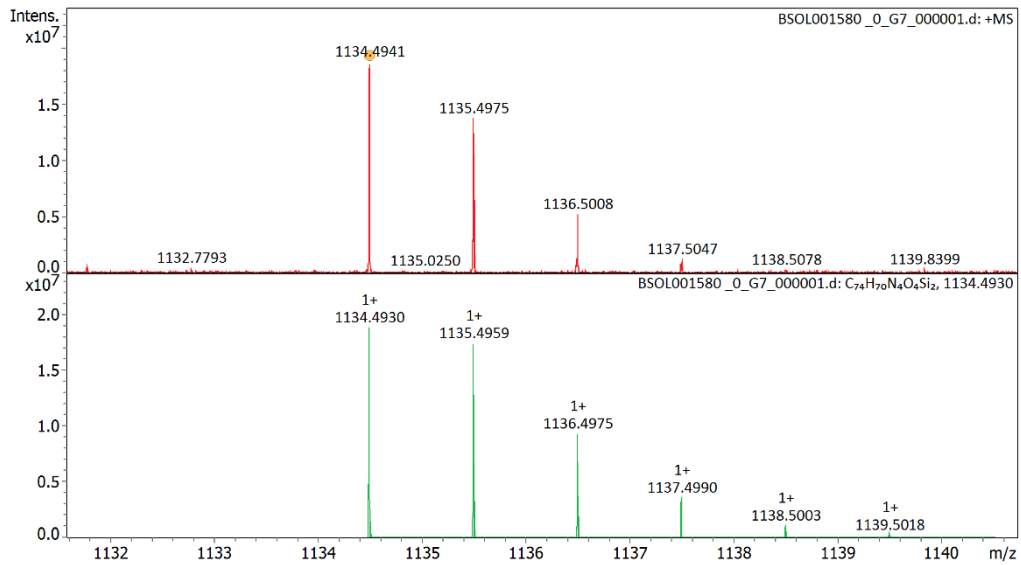

Evaluation Spectra / Validation Formula:

| # | Ion Formula   | Adduct | m/z       | z  | Meas. m/z | mSigma | N-Rule | err [mDa] | err [ppm] |
|---|---------------|--------|-----------|----|-----------|--------|--------|-----------|-----------|
| 1 | C74H70N4O4Si2 | M      | 1134.4930 | 1+ | 1134.4941 | 88.5   | ok     | -1.1      | -1.0      |

Calibration Info:

Internal calibration  
 Date: 17.12.2021 15:10:59  
 Polarity: Positive  
 Calibration spectrum: +MS: Scan  
 Reference mass list: MALDI: DCTB Matrix + Na-PFHA  
 Cluster (pos)  
 Calibration mode: Quadratic  
 Standard deviation: 0.604 ppm

Mass List:

| Reference m/z | Resulting m/z | Intensity | Error [ppm] | #     | m/z       | Res.   | S/N     | I %   | FWHM   |
|---------------|---------------|-----------|-------------|-------|-----------|--------|---------|-------|--------|
| 250.1464      |               |           |             | 1     | 357.0515  | 558651 | 1121.4  | 2.8   | 0.0006 |
| 251.1543      |               |           |             | 2     | 359.0512  | 559389 | 1344.2  | 3.3   | 0.0006 |
| 273.1362      |               |           |             | 3     | 408.9481  | 450815 | 5664.6  | 14.5  | 0.0009 |
| 332.2009      |               |           |             | 4     | 449.9749  | 419844 | 1459.2  | 3.9   | 0.0011 |
| 408.9481      | 408.9481      | 143402448 | -0.013      | 5     | 576.9423  | 332643 | 772.2   | 2.3   | 0.0017 |
| 500.2934      |               |           |             | 6     | 578.9419  | 332803 | 1535.7  | 4.5   | 0.0017 |
| 501.3013      |               |           |             | 7     | 580.9416  | 323088 | 668.9   | 2.0   | 0.0018 |
| 523.2832      |               |           |             | 8     | 607.1990  | 320205 | 4608.1  | 14.0  | 0.0019 |
| 750.4404      |               |           |             | 9     | 608.2025  | 314428 | 1549.8  | 4.7   | 0.0019 |
| 751.4483      |               |           |             | 10    | 609.1967  | 473404 | 589.8   | 1.8   | 0.0013 |
| 773.4302      |               |           |             | 11    | 609.1988  | 319543 | 4205.6  | 12.7  | 0.0019 |
| 784.9069      | 794.9071      | 871369152 | 0.205       | 12    | 610.2021  | 314910 | 1442.7  | 4.4   | 0.0019 |
| 1000.5874     |               |           |             | 13    | 685.4364  | 284836 | 719.0   | 2.3   | 0.0024 |
| 1001.5953     |               |           |             | 14    | 794.9071  | 244104 | 24668.5 | 88.1  | 0.0033 |
| 1023.5772     |               |           |             | 15    | 795.9109  | 244115 | 2880.8  | 10.3  | 0.0033 |
| 1180.8657     | 1180.8654     | 681921536 | -0.291      | 16    | 829.0892  | 231134 | 567.4   | 2.1   | 0.0036 |
| 1566.8246     | 1566.8242     | 281248256 | -0.247      | 17    | 878.8902  | 215888 | 489.9   | 1.8   | 0.0041 |
| 1952.7834     | 1952.7828     | 74977648  | -0.344      | 18    | 1091.4393 | 179518 | 837.9   | 3.6   | 0.0061 |
| 2338.7423     | 2338.7442     | 20150266  | 0.827       | 19    | 1092.4425 | 184266 | 583.1   | 2.5   | 0.0059 |
| 2724.7011     |               |           |             | 20    | 1134.4941 | 169930 | 431.6   | 1.9   | 0.0067 |
| 3110.6599     |               |           |             | 21    | 1180.8654 | 165277 | 14309.4 | 68.9  | 0.0071 |
| 3496.6188     |               |           |             | 22    | 1181.8692 | 165073 | 2631.8  | 12.7  | 0.0072 |
| 3882.5776     |               |           |             | 23    | 1193.1622 | 163421 | 530.6   | 2.6   | 0.0073 |
| 4268.5365     |               |           |             | 24    | 1241.3972 | 160357 | 18579.9 | 94.0  | 0.0077 |
| 4654.4953     |               |           |             | 25    | 1242.4004 | 161191 | 16528.9 | 83.6  | 0.0077 |
| 5040.4541     |               |           |             | 26    | 1243.3984 | 160643 | 19776.5 | 100.0 | 0.0077 |
| 5426.4130     |               |           |             | 27    | 1244.4005 | 163449 | 16480.4 | 83.3  | 0.0076 |
| 5812.3718     |               |           |             | 28    | 1245.3947 | 185537 | 919.4   | 4.7   | 0.0067 |
| 6198.3307     |               |           |             | 29    | 1245.4036 | 165467 | 5847.7  | 29.6  | 0.0075 |
| 6584.2895     |               |           |             | 30    | 1246.3972 | 179882 | 579.7   | 2.9   | 0.0069 |
| 6970.2483     |               |           |             | 31    | 1246.4074 | 149567 | 1045.7  | 5.3   | 0.0083 |
| 7356.2072     |               |           |             | 32    | 1376.3065 | 147642 | 483.9   | 2.4   | 0.0093 |
| 7742.1660     |               |           |             | 33    | 1377.3104 | 140792 | 376.8   | 1.9   | 0.0098 |
| 8128.1249     |               |           |             | 34    | 1463.2877 | 132522 | 362.0   | 1.8   | 0.0110 |
| 8514.0837     |               |           |             | 35    | 1464.2916 | 125042 | 323.2   | 1.6   | 0.0117 |
| 8900.0425     |               |           |             | 36    | 1566.8242 | 123877 | 5479.5  | 28.4  | 0.0126 |
| 9286.0014     |               |           |             | 37    | 1567.8283 | 119579 | 1424.2  | 7.4   | 0.0131 |
| 9671.9602     |               |           |             | 38    | 1952.7828 | 92751  | 1334.2  | 7.6   | 0.0211 |
|               |               |           |             | 39    | 1953.7866 | 90698  | 473.5   | 2.7   | 0.0215 |
|               |               |           |             | 40    | 2338.7442 | 78443  | 319.1   | 2.0   | 0.0298 |
| #             | m/z           | Res.      | S/N         | I %   | FWHM      |        |         |       |        |
| 1             | 1134.4930     | 169930    |             | 100.0 | 0.0067    |        |         |       |        |
| 2             | 1135.4959     | 170080    |             | 92.6  | 0.0067    |        |         |       |        |
| 3             | 1136.4975     | 170230    |             | 49.7  | 0.0067    |        |         |       |        |
| 4             | 1137.4990     | 170380    |             | 19.2  | 0.0067    |        |         |       |        |
| 5             | 1138.5003     | 170530    |             | 5.8   | 0.0067    |        |         |       |        |
| 6             | 1139.5018     | 170680    |             | 1.4   | 0.0067    |        |         |       |        |
| 7             | 1140.5033     | 170830    |             | 0.3   | 0.0067    |        |         |       |        |

## Butadiyne macrocycle 2:

$^1\text{H}$  NMR (500 MHz, THF-d<sub>8</sub>): as used for further synthesis

gmayor-3973.3.fid  
User gmayor  
da-276  
H1ns128 THF /opt/nmrdata gmayor 55

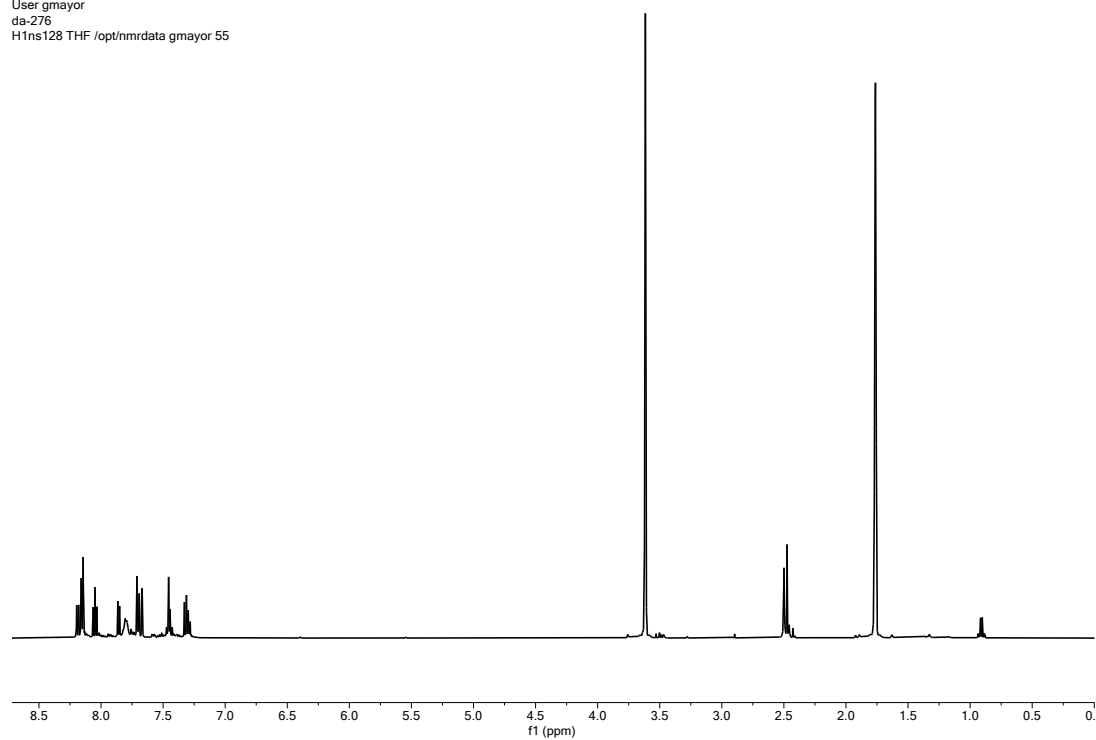

$^1\text{H}$  NMR (500 MHz, THF-d<sub>8</sub>): after GPC

gmayor-3450.1.fid  
User da  
252\_after gpc  
H1 T\_MeOD /opt/nmrdata gmayor 30

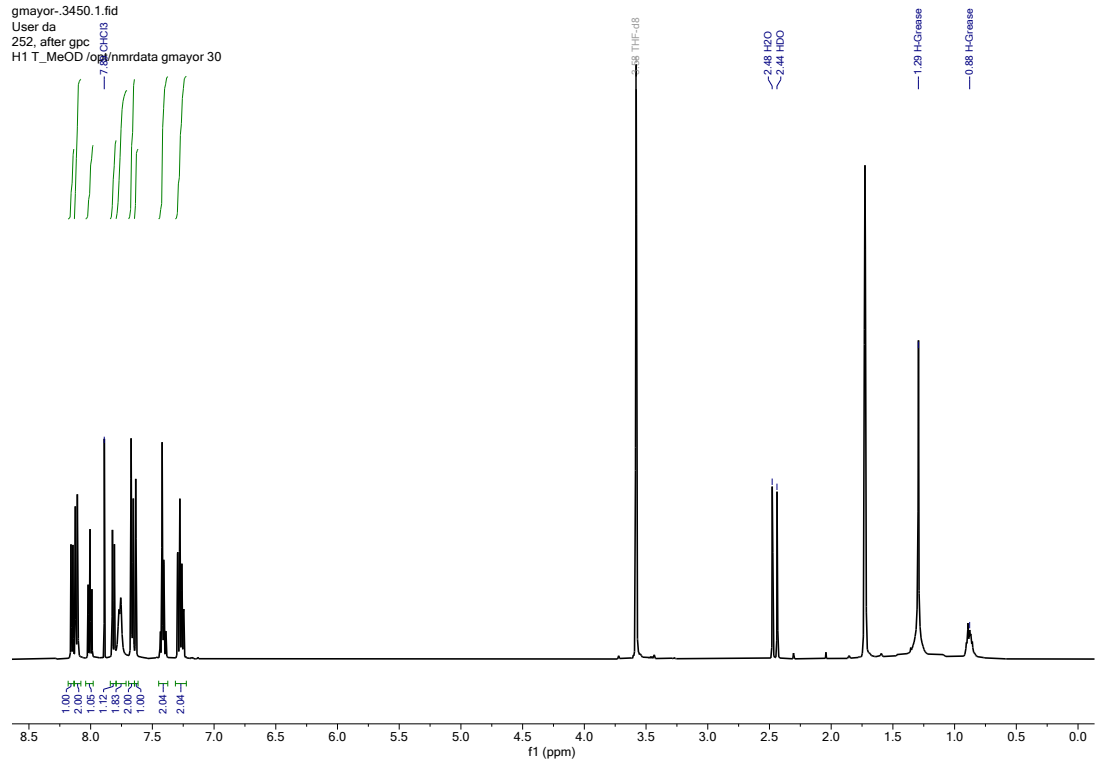

<sup>13</sup>C NMR (126 MHz, THF-d8):

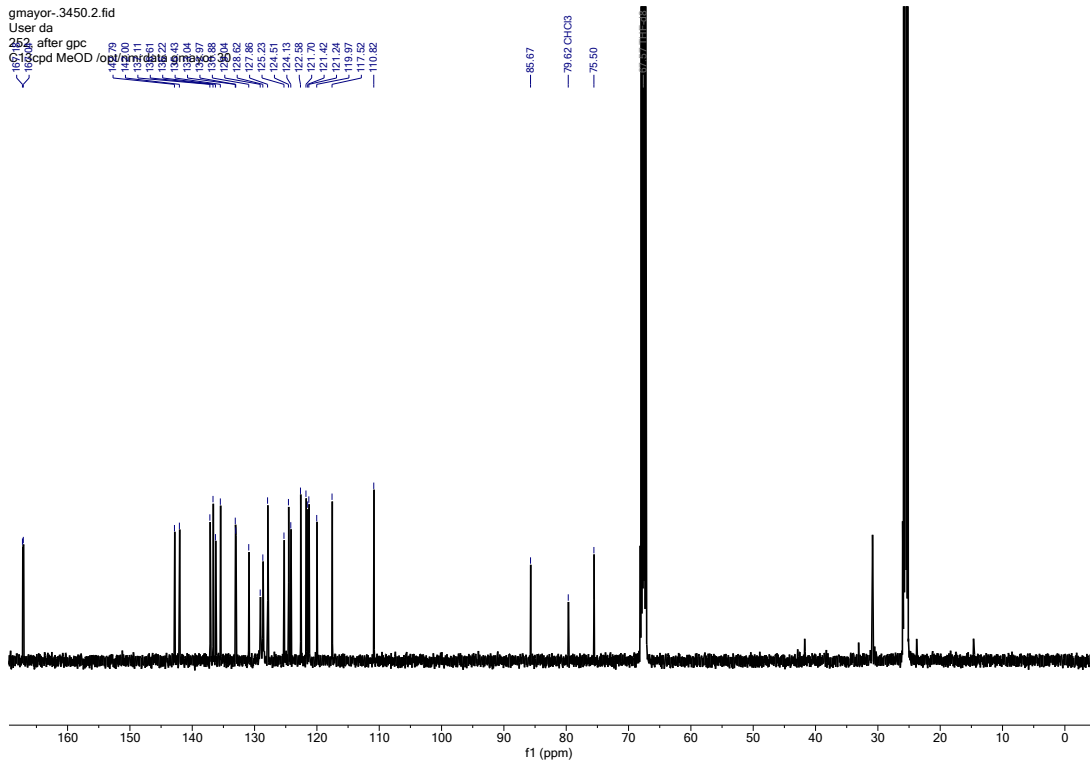

FT-IR (neat)

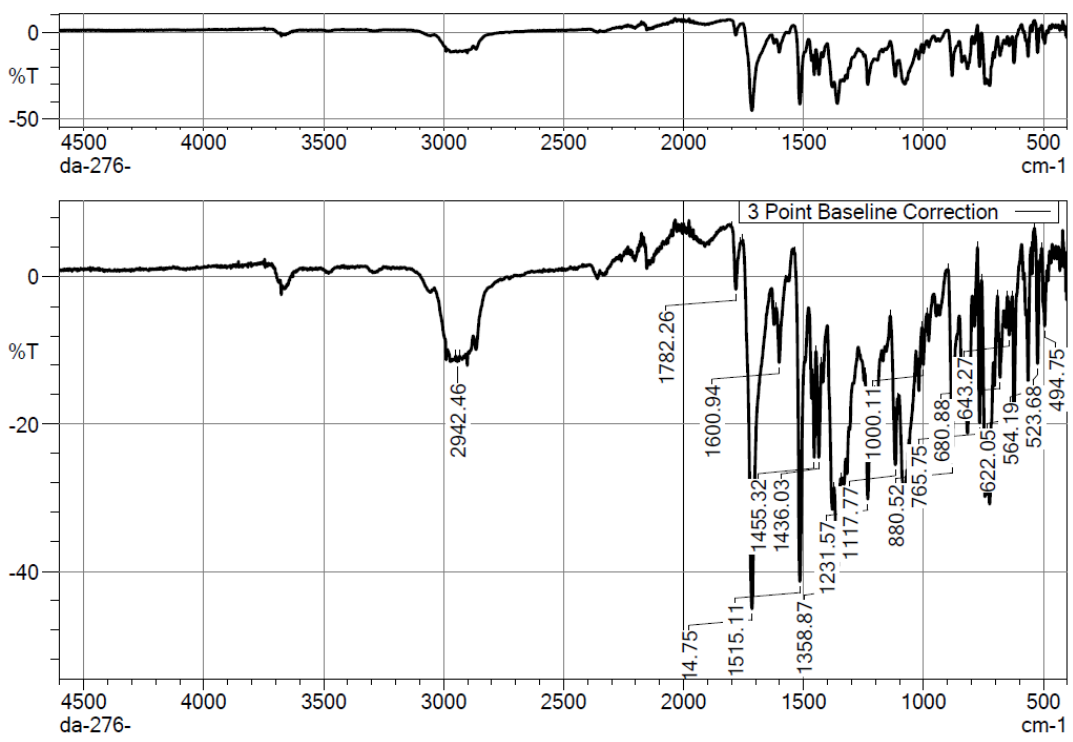

# HRMS (MALDI-ToF):

BSOL001237 Adriano D'Addio/ - DA-252 - DCM - DCTB+Ag 1:10:1

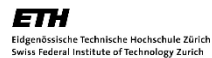

## Acquisition Parameter

|                      |                                                 |                             |                     |
|----------------------|-------------------------------------------------|-----------------------------|---------------------|
| Method:              | MALDI_MS_POS_300-2600_2M_16AvScans              | Acquisition Date:           | 27.01.2021 07:56:13 |
| File Name:           | D:\ETH\Data\BSOL001237\BSOL001237_0_H5_000001.d | Operator:                   | Michael Meier       |
| Source:              | Dual (MALDI/ESI)                                | Polarity:                   | Positive            |
| Broadband Low Mass:  | 303.1 m/z                                       | Laser Power:                | 35.0 lp             |
| Broadband High Mass: | 2600.0 m/z                                      | Time of Flight to Detector: | 0.001 sec           |
| No. of Cell Fills:   | 1                                               | Nebulizer Gas:              | 1.3 bar             |
| Apodization:         | Full-Sine                                       | Drying Gas Flow Rate:       | 3.7 L/min           |
|                      |                                                 | Capillary:                  | 3000.0 V            |
|                      |                                                 | Drying Gas:                 | 200.0 °C            |
|                      |                                                 | Temperature:                |                     |

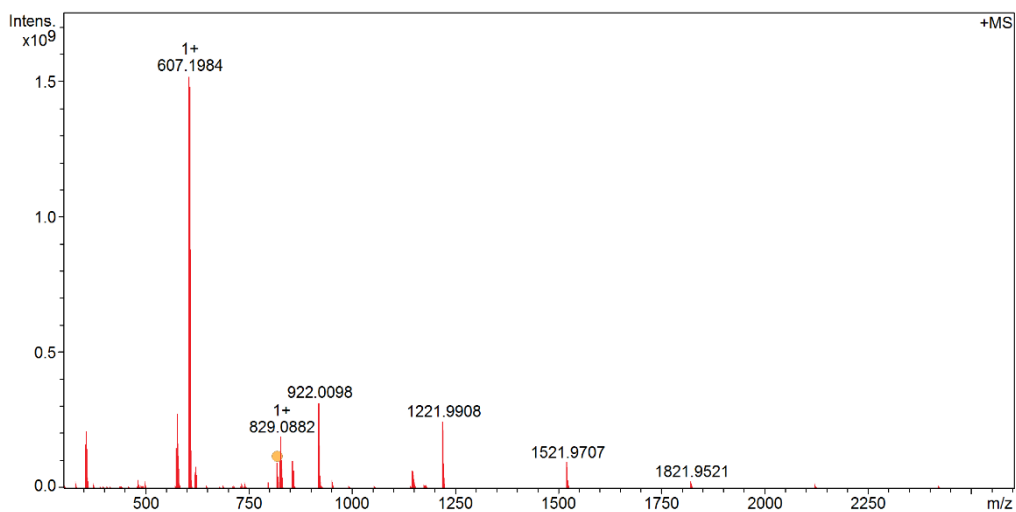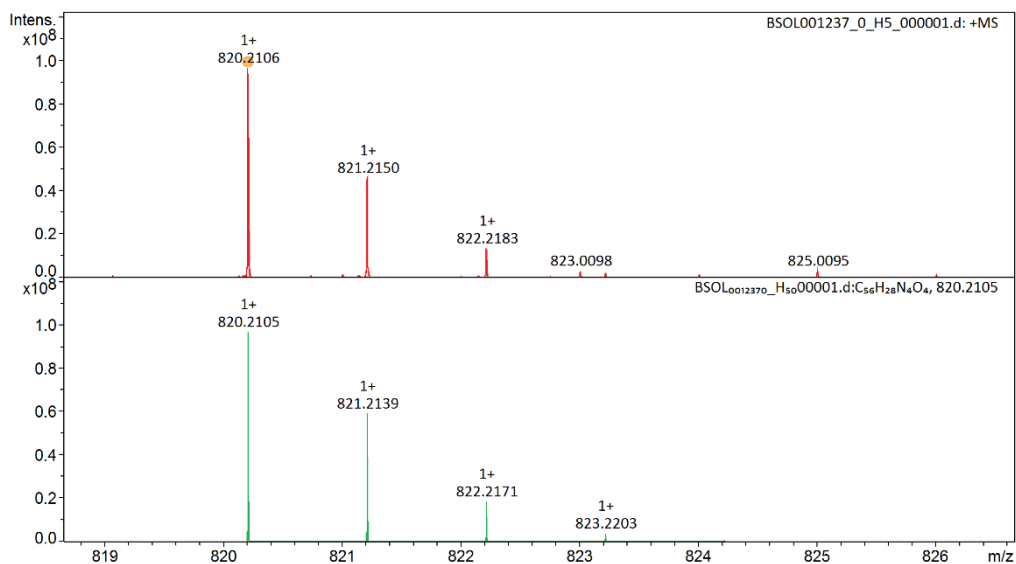

## Evaluation Spectra / Validation Formula:

| # | Ion Formula | Adduct | m/z      | z  | Meas. m/z | mSigma | N-Rule | err [mDa] | err [ppm] |
|---|-------------|--------|----------|----|-----------|--------|--------|-----------|-----------|
| 1 | C56H28N4O4  | M      | 820.2105 | 1+ | 820.2106  | 59.8   | ok     | -0.1      | -0.1      |

## Calibration Info:

Date: 27.01.2021 07:57:51  
 Polarity: Positive  
 Calibration spectrum: +MS: Scan  
 Reference mass list: MALDI: DCTB+Ag Matrix + HP-Mix (pos)  
 Calibration mode: Quadratic

| Reference m/z | Resulting m/z | Intensity  | Error [ppm] |
|---------------|---------------|------------|-------------|
| 106.9045      |               |            |             |
| 118.0863      |               |            |             |
| 250.1464      |               |            |             |
| 251.1543      |               |            |             |
| 273.1362      |               |            |             |
| 322.0481      | 322.0482      | 214019     | 0.368       |
| 332.2009      | 332.2009      | 15808783   | -0.006      |
| 357.0515      | 357.0513      | 164832720  | -0.649      |
| 500.2934      |               |            |             |
| 501.3013      |               |            |             |
| 523.2832      | 523.2837      | 1404337    | 0.918       |
| 607.1985      | 607.1984      | 1522726784 | -0.197      |
| 622.0290      | 622.0286      | 79968880   | -0.608      |
| 750.4404      |               |            |             |
| 751.4483      |               |            |             |
| 773.4302      |               |            |             |
| 857.3455      |               |            |             |
| 922.0098      | 922.0098      | 319618944  | -0.023      |
| 1000.5874     |               |            |             |
| 1001.5953     |               |            |             |
| 1023.5772     |               |            |             |
| 1107.4925     | 1107.4933     | 2420207    | 0.683       |
| 1221.9906     | 1221.9908     | 248277472  | 0.171       |
| 1521.9715     | 1521.9707     | 98525208   | -0.541      |
| 1821.9523     | 1821.9521     | 27006852   | -0.095      |
| 2121.9332     | 2121.9328     | 14298138   | -0.186      |
| 2421.9140     |               |            |             |
| 2721.8948     |               |            |             |

Standard deviation: 0.554

## Mass List:

| #  | m/z       | Res.   | S/N     | I %   | FWHM   |
|----|-----------|--------|---------|-------|--------|
| 1  | 357.0513  | 554839 | 6694.8  | 10.8  | 0.0006 |
| 2  | 359.0510  | 566548 | 8532.8  | 13.8  | 0.0006 |
| 3  | 359.0518  | 567191 | 3669.1  | 5.9   | 0.0006 |
| 4  | 576.9421  | 351471 | 4728.3  | 9.9   | 0.0016 |
| 5  | 576.9439  | 407711 | 2148.6  | 4.5   | 0.0014 |
| 6  | 578.9417  | 322079 | 8632.2  | 18.1  | 0.0018 |
| 7  | 578.9433  | 348406 | 4146.0  | 8.7   | 0.0017 |
| 8  | 579.9453  | 332571 | 1777.2  | 3.8   | 0.0017 |
| 9  | 580.9416  | 295407 | 3729.7  | 7.9   | 0.0020 |
| 10 | 580.9433  | 351769 | 1700.0  | 3.6   | 0.0017 |
| 11 | 607.1950  | 300260 | 2655.5  | 5.8   | 0.0020 |
| 12 | 607.1964  | 383989 | 3540.9  | 7.7   | 0.0016 |
| 13 | 607.1984  | 319817 | 46103.1 | 100.0 | 0.0019 |
| 14 | 608.2023  | 288424 | 19038.3 | 41.3  | 0.0021 |
| 15 | 609.1940  | 412863 | 1890.9  | 4.1   | 0.0015 |
| 16 | 609.1951  | 353732 | 2489.3  | 5.4   | 0.0017 |
| 17 | 609.1963  | 417428 | 2379.1  | 5.2   | 0.0015 |
| 18 | 609.1983  | 339598 | 44876.8 | 97.3  | 0.0018 |
| 19 | 609.2051  | 406026 | 2383.0  | 5.2   | 0.0015 |
| 20 | 610.2020  | 284792 | 18860.7 | 40.9  | 0.0021 |
| 21 | 611.2055  | 254361 | 1489.2  | 3.3   | 0.0024 |
| 22 | 622.0286  | 193950 | 2358.8  | 5.3   | 0.0032 |
| 23 | 820.2106  | 240736 | 2344.9  | 6.3   | 0.0034 |
| 24 | 820.2139  | 224757 | 2236.6  | 6.1   | 0.0036 |
| 25 | 827.0888  | 192202 | 2513.7  | 6.8   | 0.0043 |
| 26 | 827.0920  | 330211 | 1946.5  | 5.3   | 0.0025 |
| 27 | 829.0882  | 236534 | 4645.2  | 12.6  | 0.0035 |
| 28 | 829.0919  | 258057 | 3665.6  | 9.9   | 0.0032 |
| 29 | 830.0925  | 188239 | 1517.2  | 4.1   | 0.0044 |
| 30 | 831.0887  | 239377 | 1792.7  | 4.9   | 0.0035 |
| 31 | 831.0930  | 287835 | 1354.8  | 3.7   | 0.0029 |
| 32 | 857.3457  | 228233 | 1438.6  | 4.0   | 0.0038 |
| 33 | 857.3489  | 210308 | 2507.0  | 6.9   | 0.0041 |
| 34 | 859.3463  | 256942 | 1570.6  | 4.4   | 0.0033 |
| 35 | 859.3503  | 291941 | 1588.7  | 4.4   | 0.0029 |
| 36 | 922.0098  | 183914 | 7394.5  | 21.0  | 0.0050 |
| 37 | 922.0149  | 253375 | 2830.7  | 8.0   | 0.0036 |
| 38 | 1149.0077 | 142496 | 1403.1  | 4.3   | 0.0081 |
| 39 | 1221.9908 | 118904 | 5185.8  | 16.3  | 0.0103 |
| 40 | 1521.9707 | 97333  | 1955.8  | 6.5   | 0.0156 |
| #  | m/z       | Res.   | S/N     | I %   | FWHM   |
| 1  | 820.2105  | 240736 |         | 100.0 | 0.0034 |
| 2  | 821.2075  | 241028 |         | 1.5   | 0.0034 |
| 3  | 821.2139  | 241030 |         | 61.0  | 0.0034 |
| 4  | 822.2109  | 241323 |         | 0.9   | 0.0034 |
| 5  | 822.2171  | 241325 |         | 19.1  | 0.0034 |
| 6  | 823.2142  | 241617 |         | 0.3   | 0.0034 |
| 7  | 823.2203  | 241619 |         | 4.1   | 0.0034 |
| 8  | 824.2234  | 241914 |         | 0.7   | 0.0034 |

Full assignment at 218 K:

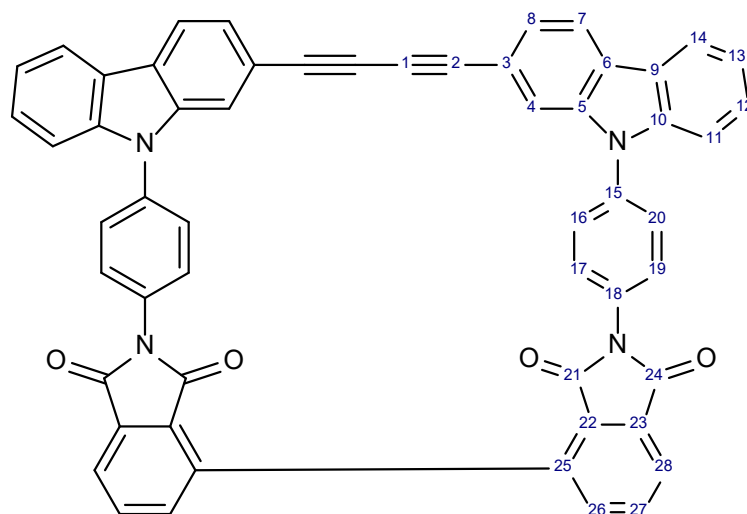

| Nr | <sup>1</sup> H [ppm] | <sup>13</sup> C [ppm] | Nr | <sup>1</sup> H [ppm] | <sup>13</sup> C [ppm] |
|----|----------------------|-----------------------|----|----------------------|-----------------------|
| 1  | -                    | 75.29                 | 15 | -                    | 136.82                |
| 2  | -                    | 85.66                 | 16 | 7.79                 | 128.82                |
| 3  | -                    | 119.45                | 17 | 7.83                 | 130.14                |
| 4  | 7.71                 | 117.48                | 18 | -                    | 132.55                |
| 5  | -                    | 141.40                | 19 | 7.65                 | 129.23                |
| 6  | -                    | 125.05                | 20 | 7.76                 | 128.13                |
| 7  | 8.23                 | 121.57                | 21 | -                    | 167.12                |
| 8  | 7.36                 | 122.52                | 22 | -                    | 130.80                |
| 9  | -                    | 123.80                | 23 | -                    | 132.74                |
| 10 | -                    | 142.26                | 24 | -                    | 167.30                |
| 11 | 7.52                 | 110.82                | 25 | -                    | 135.83                |
| 12 | 7.47                 | 128.05                | 26 | 7.92                 | 136.70                |
| 13 | 7.31                 | 121.53                | 27 | 8.09                 | 135.63                |
| 14 | 8.24                 | 121.92                | 28 | 8.17                 | 124.53                |



## VT-<sup>1</sup>H NMR (600 MHz, THF-d8):

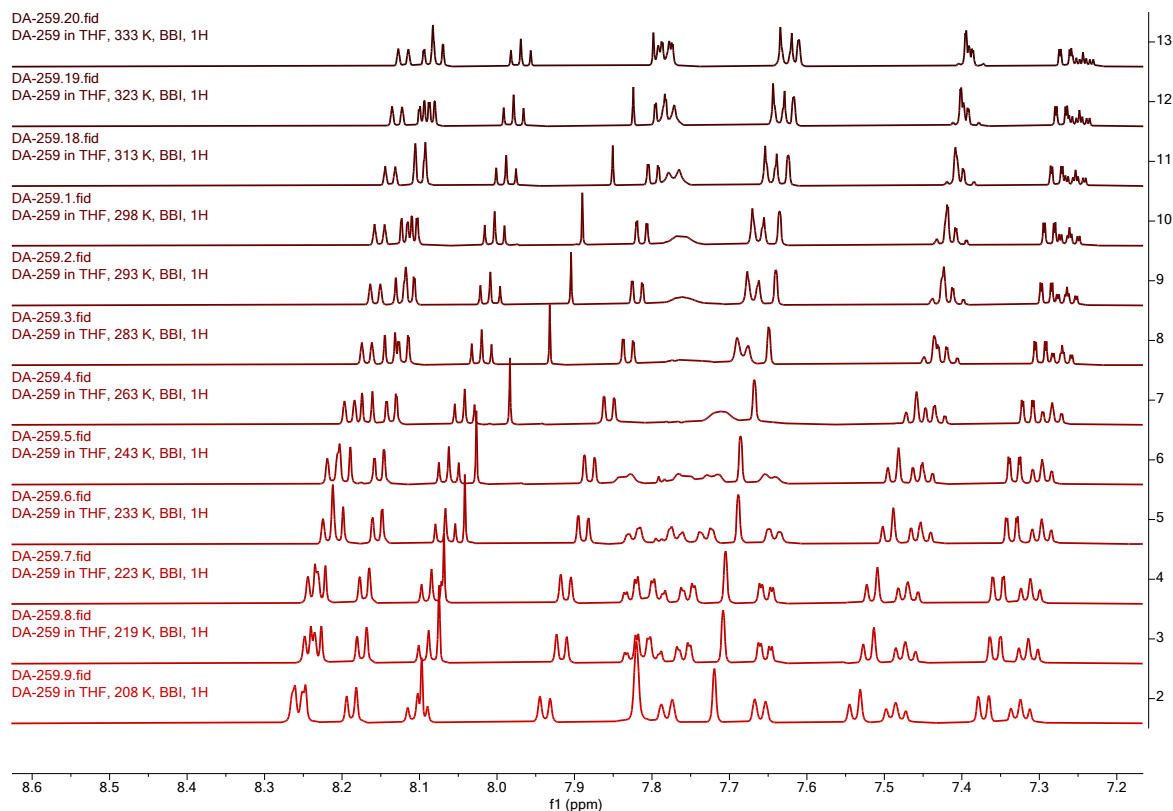

VT-NMR shows coalescence at 265 K for the exchanging protons H-17 and H-19, and at 253 K for protons H-16 and H-20 coalesce. The shift difference  $|v_A - v_B|$  between the exchanging was determined as 109.6 and 22.9 Hz, respectively. The Eyring equation can be rewritten followingly to determine the rotational barrier.<sup>[1]</sup>

$$\Delta G = RT_c \cdot \ln \frac{RT_c \sqrt{2}}{\pi N_A h |v_A - v_B|}$$

With the above mentioned  $T_c$  and shift differences we obtain activation barriers of 52.4 kJ/mol for H-17/19 and 53.2 kJ/mol, or an averaged rotational barrier of 52.8 kJ/mol. The uncertainty of the activation barrier is estimated to be  $\pm 1$  kJ/mol.

$^{13}\text{C}$  NMR (150 MHz, THF-d8): at 219 K

DA-259.15.fid  
DA-259 in THF, 219 K, BBI,  $^{13}\text{C}$ (1H)

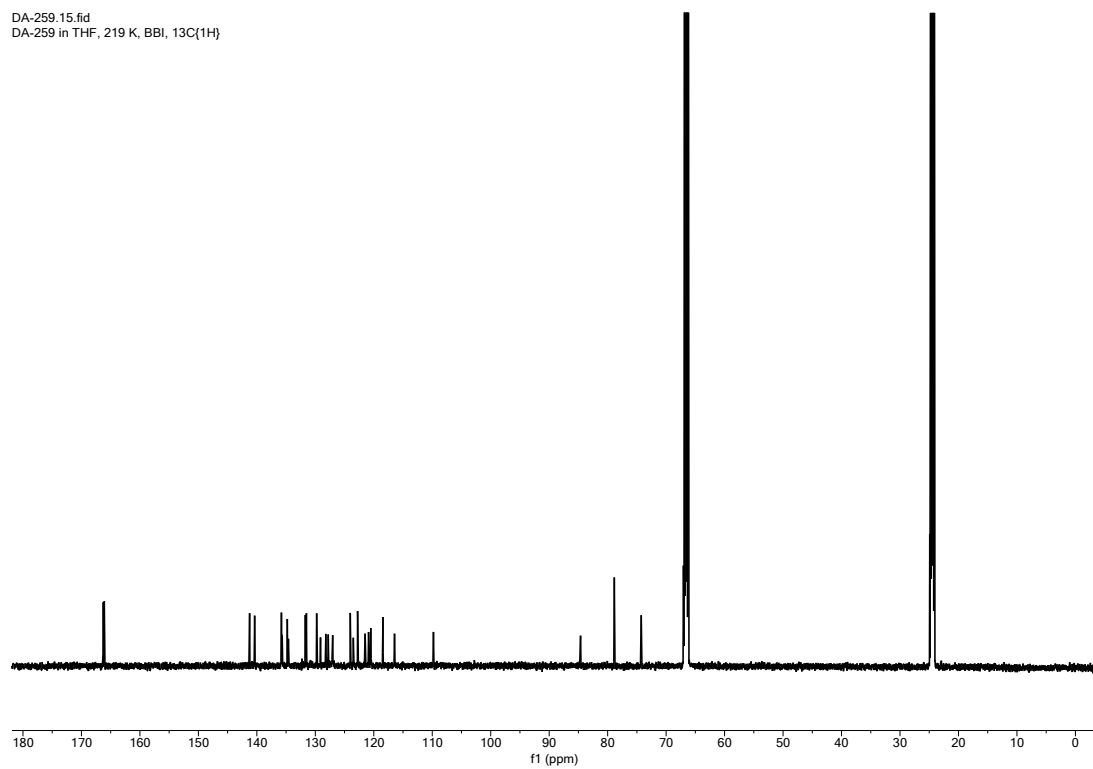

HSQC: at 219 K

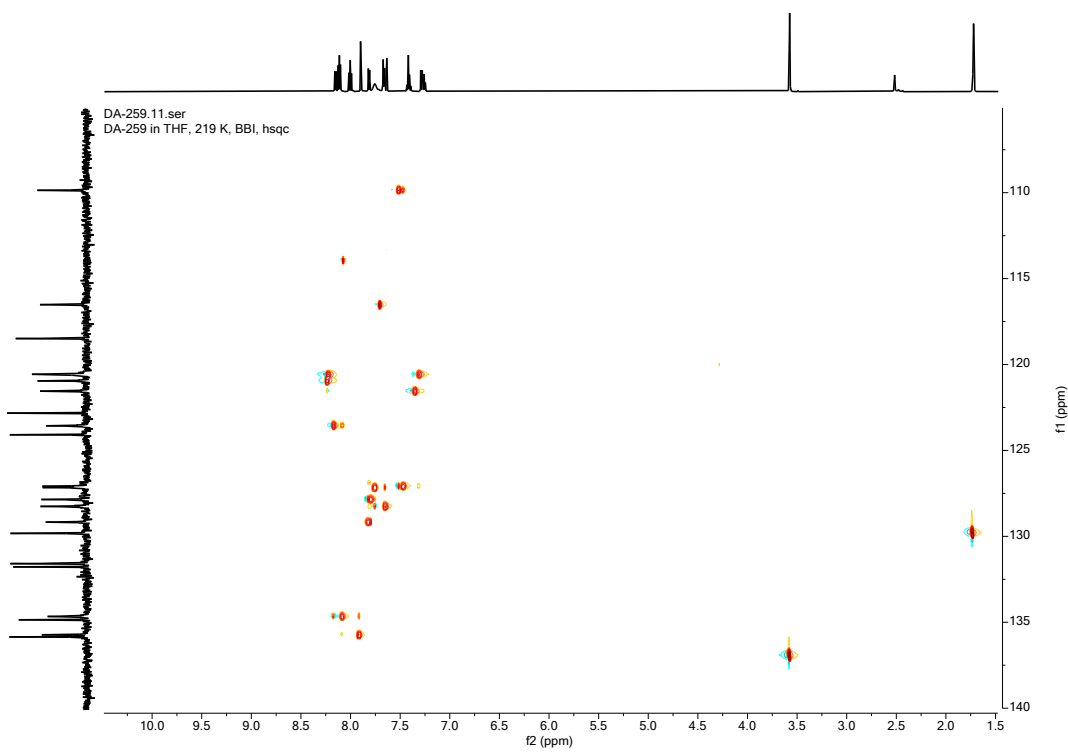

HMBC: at 219 K

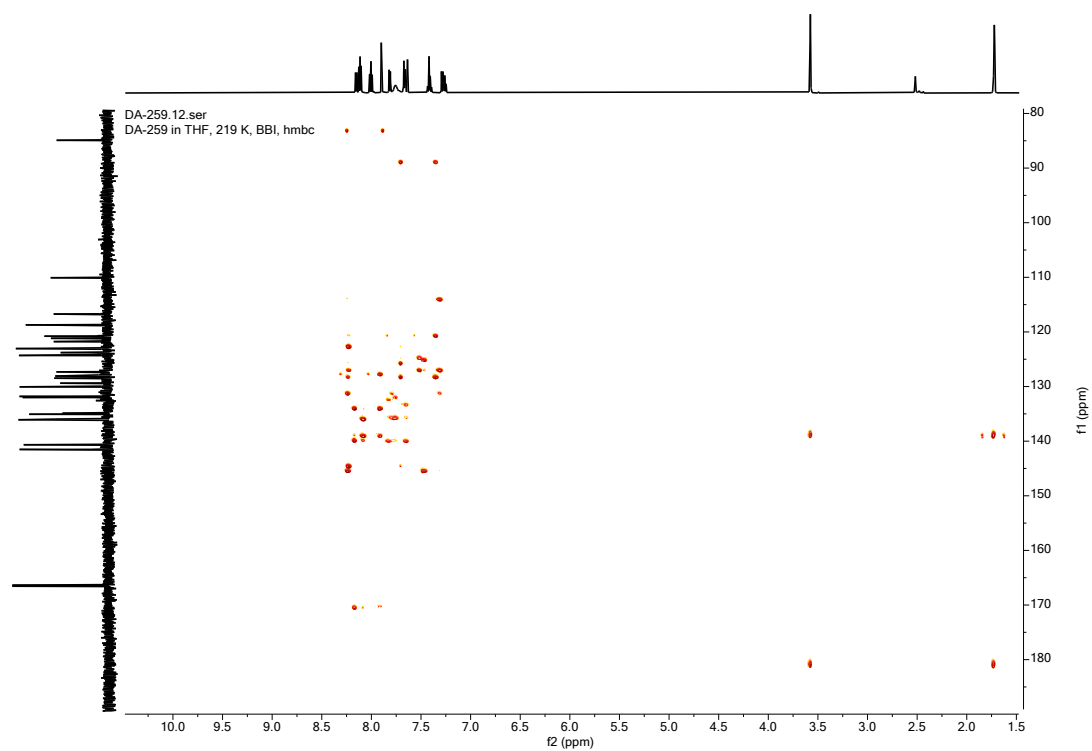

COSY: at 219 K

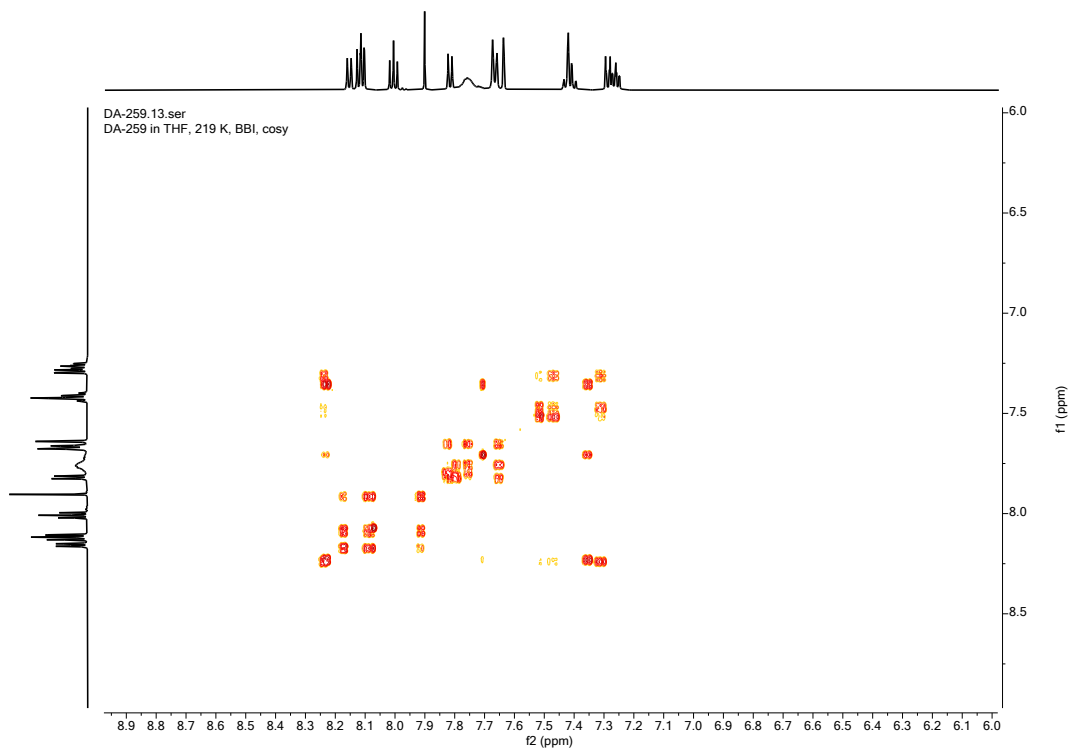

ROESY: at 219 K

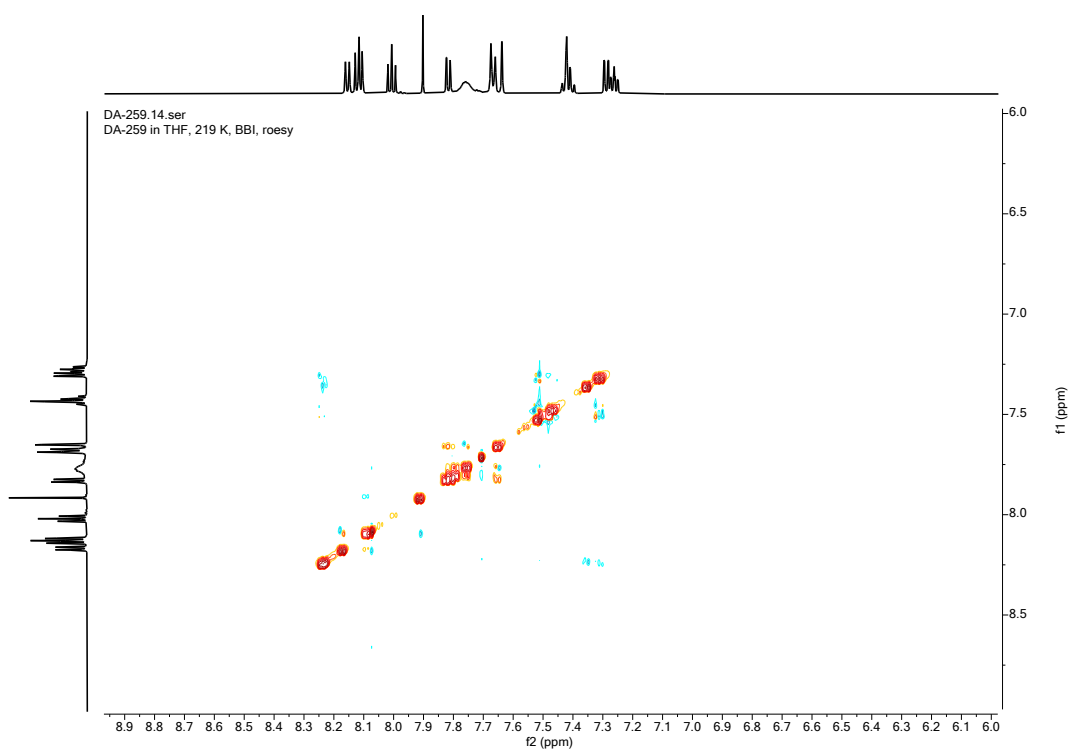

## Thiophene macrocycle 1:

$^1\text{H}$  NMR (500 MHz,  $\text{CDCl}_3$ ):

gmayor-3917.7.fid  
User gmayor  
DA-287 recryst  
H1ns128 THF /opt/nmrdata gmayor 25

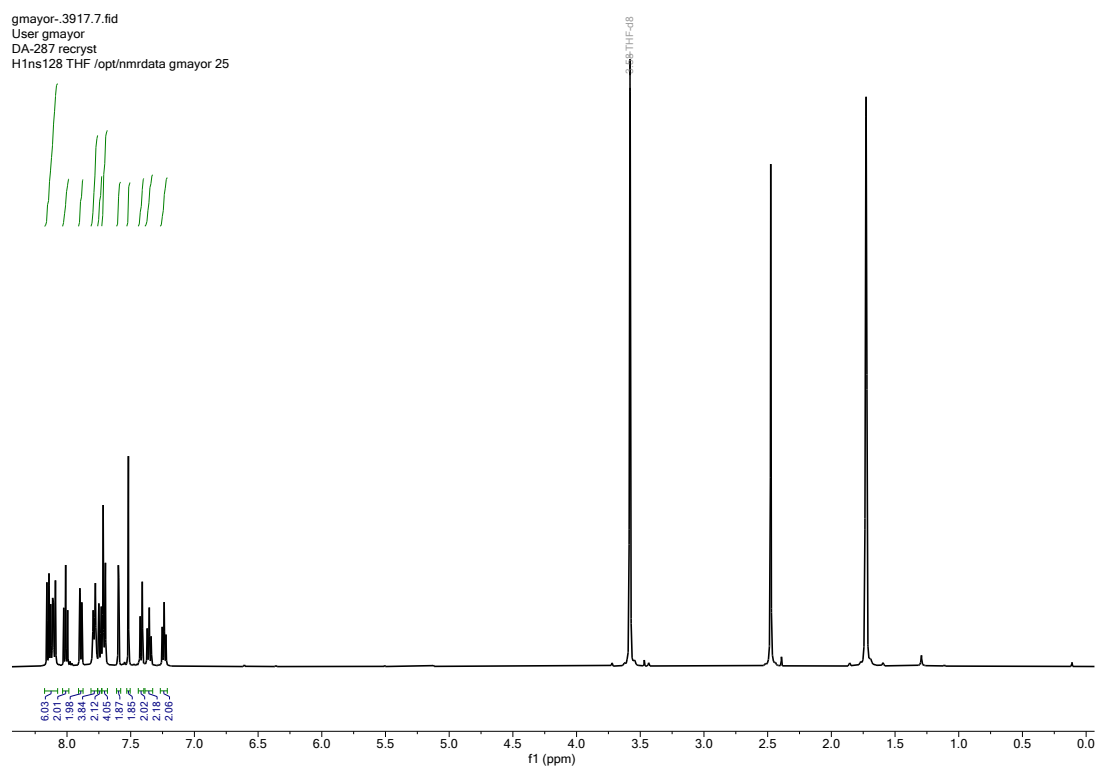

# $^{13}\text{C}$ NMR (126 MHz, $\text{CDCl}_3$ ):

gmayor-3917.4.fid  
User gmayor  
DA-287 recryst  
C13cpd THF /opt/nmrdata gmayor 25

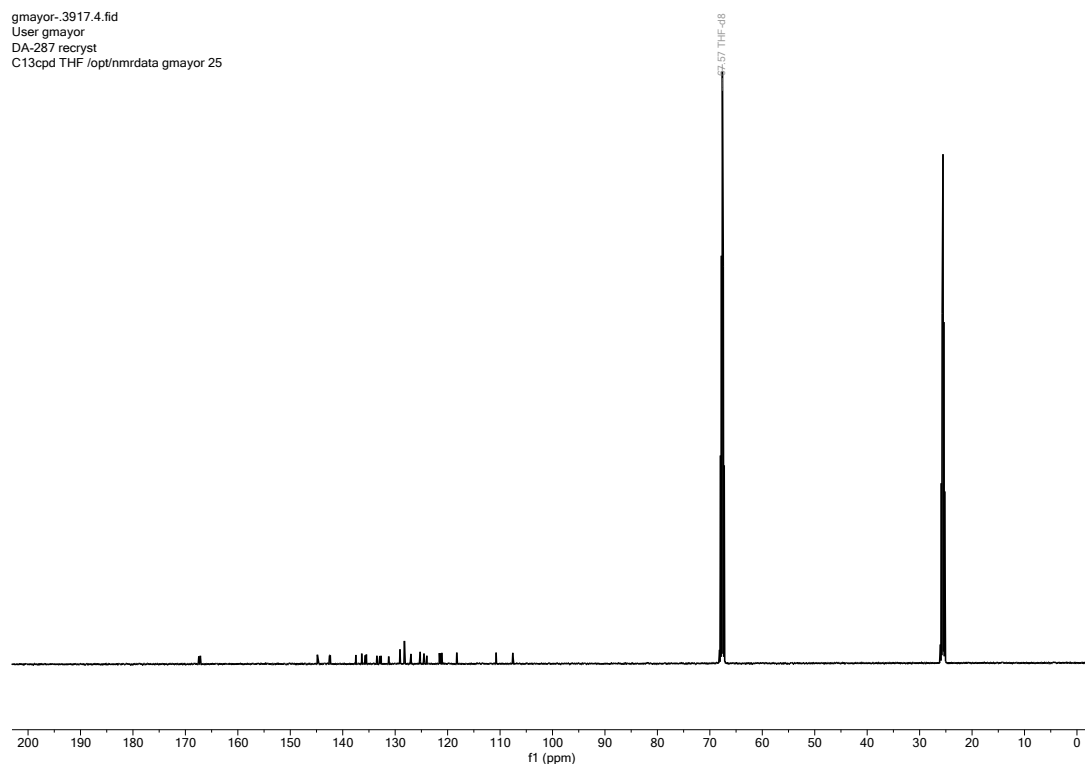

# FT-IR (neat)

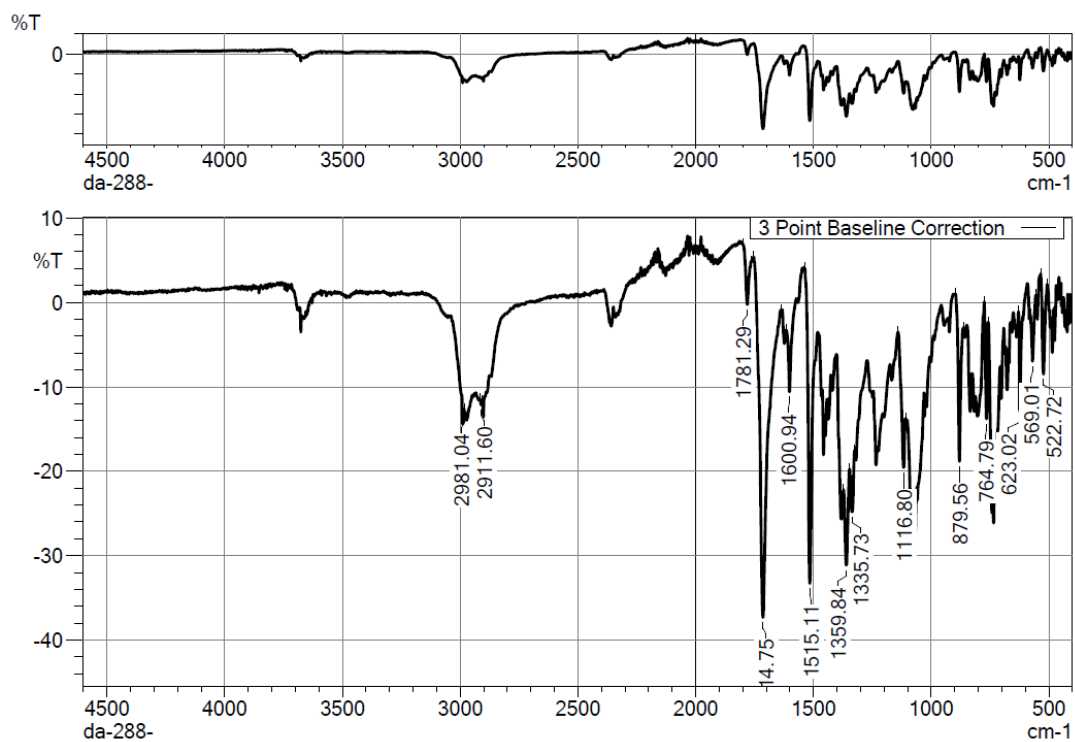

# HRMS (ESI-ToF):

## High Resolution Mass Spectrometry Report

Sample Name **DA287**  
Comment

Instrument maXis 4G  
Method 23 Direct\_pos\_higher.m

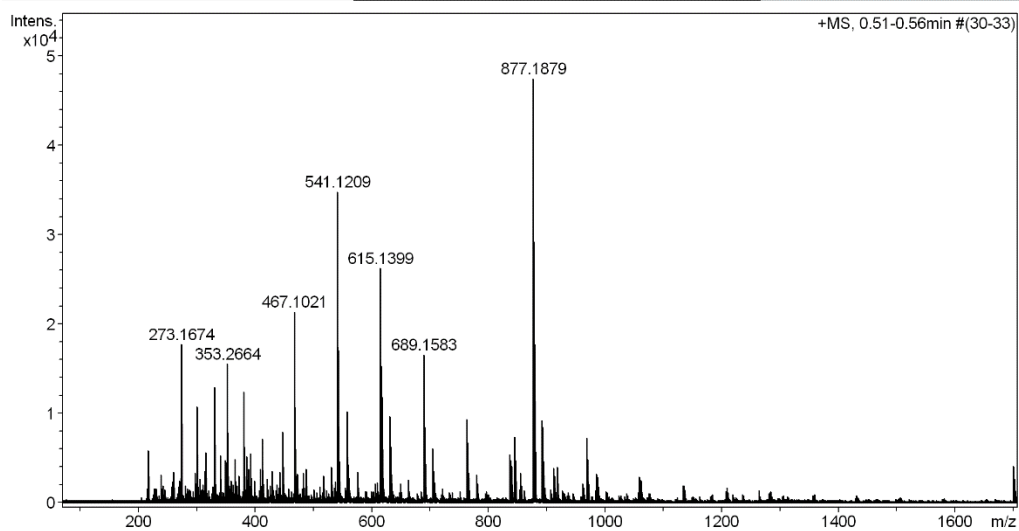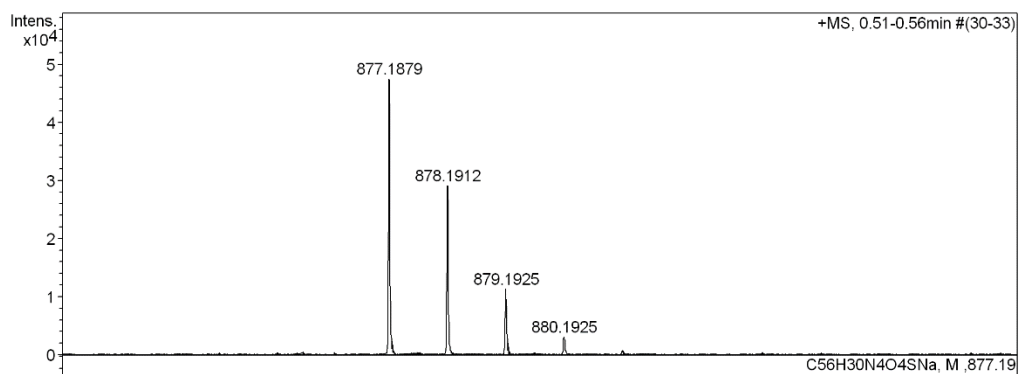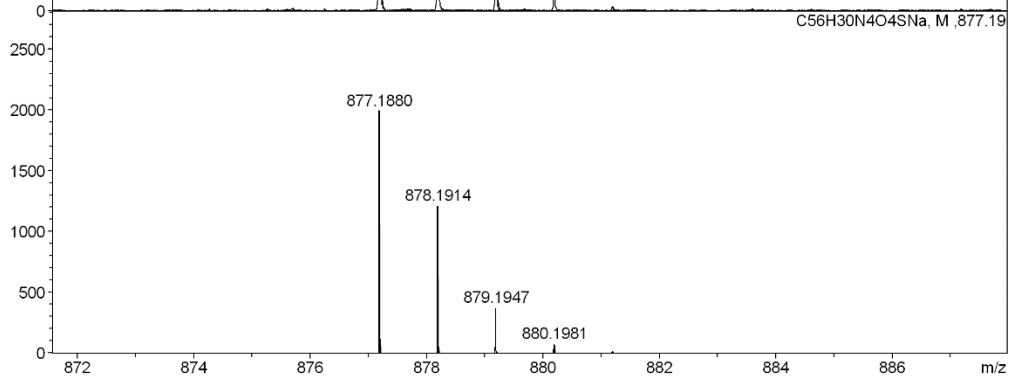

# High Resolution Mass Spectrometry Report

## Measured m/z vs. theoretical m/z

| Meas. m/z | # | Formula                                                           | Score  | m/z      | err [mDa] | err [ppm] | mSigma | rdb  | e <sup>-</sup> Conf | z  |
|-----------|---|-------------------------------------------------------------------|--------|----------|-----------|-----------|--------|------|---------------------|----|
| 877.1879  | 1 | C <sub>56</sub> H <sub>30</sub> N <sub>4</sub> NaO <sub>4</sub> S | 100.00 | 877.1880 | 0.1       | 0.1       | 10.3   | 43.5 | even                | 1+ |
| 893.1617  | 1 | C <sub>56</sub> H <sub>30</sub> KN <sub>4</sub> O <sub>4</sub> S  | 100.00 | 893.1619 | 0.2       | 0.2       | 57.0   | 43.5 | even                |    |

## Mass list

| #  | m/z      | I %  | I     |
|----|----------|------|-------|
| 1  | 217.1043 | 12.3 | 5867  |
| 2  | 239.0898 | 6.6  | 3148  |
| 3  | 261.1309 | 7.4  | 3527  |
| 4  | 273.1674 | 37.4 | 17771 |
| 5  | 297.2403 | 7.2  | 3404  |
| 6  | 301.1411 | 22.7 | 10776 |
| 7  | 301.1621 | 7.9  | 3767  |
| 8  | 305.1574 | 5.6  | 2667  |
| 9  | 313.2349 | 7.6  | 3590  |
| 10 | 315.1778 | 11.9 | 5641  |
| 11 | 331.2093 | 27.3 | 12976 |
| 12 | 341.2664 | 11.2 | 5338  |
| 13 | 348.9903 | 10.1 | 4819  |
| 14 | 349.1836 | 5.9  | 2788  |
| 15 | 350.9872 | 9.7  | 4590  |
| 16 | 353.2664 | 32.8 | 15596 |
| 17 | 354.2696 | 6.4  | 3040  |
| 18 | 365.1059 | 10.3 | 4910  |
| 19 | 373.2197 | 6.5  | 3075  |
| 20 | 381.2973 | 26.2 | 12432 |
| 21 | 382.3008 | 6.3  | 3010  |
| 22 | 385.2921 | 10.9 | 5198  |
| 23 | 389.2512 | 8.1  | 3843  |
| 24 | 393.2975 | 11.6 | 5507  |
| 25 | 409.1310 | 8.1  | 3830  |
| 26 | 413.2659 | 15.2 | 7217  |
| 27 | 421.2321 | 5.6  | 2674  |
| 28 | 429.3181 | 7.4  | 3536  |
| 29 | 443.3344 | 7.3  | 3477  |
| 30 | 447.3443 | 16.7 | 7952  |
| 31 | 467.1021 | 45.1 | 21429 |
| 32 | 468.1025 | 17.8 | 8439  |
| 33 | 469.1003 | 12.8 | 6062  |
| 34 | 469.3286 | 8.8  | 4158  |
| 35 | 473.3445 | 6.9  | 3263  |
| 36 | 483.0756 | 7.1  | 3393  |
| 37 | 487.3606 | 8.1  | 3829  |
| 38 | 517.3709 | 6.5  | 3082  |
| 39 | 531.3869 | 8.4  | 3993  |
| 40 | 541.1209 | 73.3 | 34835 |
| 41 | 542.1214 | 36.1 | 17144 |
| 42 | 543.1196 | 25.7 | 12221 |
| 43 | 544.1197 | 10.0 | 4728  |
| 44 | 557.0951 | 21.6 | 10261 |
| 45 | 558.0952 | 11.0 | 5205  |
| 46 | 559.0937 | 9.1  | 4337  |
| 47 | 561.3964 | 5.9  | 2792  |
| 48 | 575.4128 | 7.4  | 3522  |
| 49 | 615.1399 | 55.3 | 26273 |
| 50 | 616.1405 | 32.4 | 15403 |
| 51 | 617.1382 | 25.0 | 11890 |
| 52 | 618.1380 | 9.6  | 4551  |
| 53 | 619.4389 | 6.0  | 2866  |
| 54 | 631.1136 | 20.5 | 9744  |
| 55 | 632.1142 | 13.3 | 6336  |
| 56 | 633.1121 | 11.1 | 5259  |
| 57 | 663.4658 | 5.5  | 2620  |
| 58 | 689.1583 | 35.0 | 16631 |
| 59 | 690.1591 | 23.2 | 11034 |
| 60 | 691.1572 | 17.8 | 8452  |
| 61 | 692.1571 | 8.7  | 4125  |

## High Resolution Mass Spectrometry Report

| #   | m/z       | I %   | I     |
|-----|-----------|-------|-------|
| 62  | 705.1324  | 12.8  | 6059  |
| 63  | 706.1327  | 7.6   | 3613  |
| 64  | 707.1306  | 7.5   | 3551  |
| 65  | 763.1769  | 19.8  | 9423  |
| 66  | 764.1783  | 14.3  | 6777  |
| 67  | 765.1756  | 11.4  | 5403  |
| 68  | 766.1761  | 6.0   | 2841  |
| 69  | 779.1505  | 6.6   | 3159  |
| 70  | 780.1503  | 6.2   | 2962  |
| 71  | 837.1958  | 11.5  | 5461  |
| 72  | 838.1967  | 10.1  | 4781  |
| 73  | 839.1940  | 8.7   | 4147  |
| 74  | 845.2156  | 15.7  | 7445  |
| 75  | 846.2195  | 10.1  | 4786  |
| 76  | 854.1967  | 7.1   | 3351  |
| 77  | 855.2028  | 7.0   | 3341  |
| 78  | 877.1879  | 100.0 | 47510 |
| 79  | 878.1912  | 61.5  | 29195 |
| 80  | 879.1925  | 24.0  | 11419 |
| 81  | 880.1925  | 6.8   | 3219  |
| 82  | 891.2032  | 19.6  | 9295  |
| 83  | 892.2068  | 11.6  | 5516  |
| 84  | 893.1617  | 18.0  | 8543  |
| 85  | 893.2055  | 5.6   | 2651  |
| 86  | 894.1656  | 11.6  | 5532  |
| 87  | 895.1963  | 6.7   | 3189  |
| 88  | 911.2143  | 8.2   | 3895  |
| 89  | 912.2154  | 7.4   | 3518  |
| 90  | 913.2127  | 6.4   | 3026  |
| 91  | 918.2144  | 8.4   | 3992  |
| 92  | 969.2354  | 15.4  | 7316  |
| 93  | 970.2383  | 10.2  | 4866  |
| 94  | 985.2337  | 6.8   | 3242  |
| 95  | 986.2345  | 5.7   | 2718  |
| 96  | 987.2323  | 6.1   | 2902  |
| 97  | 1059.2540 | 6.2   | 2952  |
| 98  | 1699.4165 | 6.5   | 3107  |
| 99  | 1700.4181 | 8.7   | 4149  |
| 100 | 1701.4197 | 5.8   | 2749  |

### Acquisition Parameter

|                   |                              |                |                                       |                |              |           |
|-------------------|------------------------------|----------------|---------------------------------------|----------------|--------------|-----------|
| <b>General</b>    | Fore Vacuum                  | 2.39e+000 mBar | High Vacuum                           | 1.05e-007 mBar | Source Type  | ESI       |
|                   | Scan Begin                   | 75 m/z         | Scan End                              | 1700 m/z       | Ion Polarity | Positive  |
| <b>Source</b>     | Set Nebulizer                | 0.4 Bar        | Set Capillary                         | 3600 V         | Set Dry Gas  | 4.0 l/min |
|                   | Set Dry Heater               | 180 °C         | Set End Plate Offset                  | -500 V         |              |           |
| <b>Quadrupole</b> | Set Ion Energy ( MS only )   | 4.0 eV         |                                       |                | 100.0 Vpp    |           |
| <b>Coll. Cell</b> | Collision Energy             | 8.0 eV         | Set Collision Cell RF                 | 500.0 Vpp      |              |           |
| <b>Ion Cooler</b> | Set Ion Cooler Transfer Time | 100.0 µs       | Set Ion Cooler Pre Pulse Storage Time | 18.0 µs        |              |           |



Complete Assignment at 218 K:

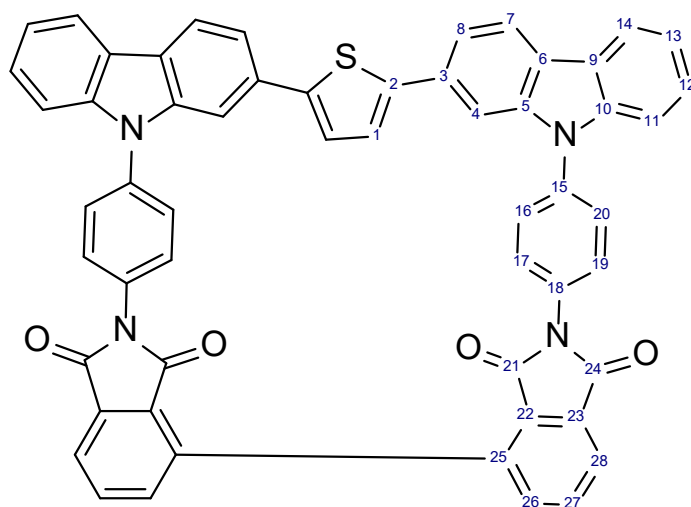

| Nr | $^1\text{H}$ [ppm] | $^{13}\text{C}$ [ppm] | Nr | $^1\text{H}$ [ppm] | $^{13}\text{C}$ [ppm] |
|----|--------------------|-----------------------|----|--------------------|-----------------------|
| 1  | 7.69               | 125.3                 | 15 | -                  | 137.2                 |
| 2  | -                  | 144.3                 | 16 | 7.81               | 128.17                |
| 3  | -                  | 133.1                 | 17 | 7.85               | 130.3                 |
| 4  | 7.61               | 107.0                 | 18 | -                  | 132.1                 |
| 5  | -                  | 141.8                 | 19 | 7.65               | 129.5                 |
| 6  | -                  | 123.6                 | 20 | 7.82               | 128.20                |
| 7  | 8.25               | 121.8                 | 21 | -                  | 167.4                 |
| 8  | 7.85               | 118.1                 | 22 | -                  | 131.1                 |
| 9  | -                  | 124.1                 | 23 | -                  | 132.7                 |
| 10 | -                  | 142.0                 | 24 | -                  | 167.2                 |
| 11 | 7.50               | 110.8                 | 25 | -                  | 135.3                 |
| 12 | 7.40               | 127.1                 | 26 | 8.01               | 136.2                 |
| 13 | 7.29               | 121.4                 | 27 | 8.11               | 135.7                 |
| 14 | 8.20               | 121.3                 | 28 | 8.16               | 124.2                 |

## VT-<sup>1</sup>H NMR (600 MHz, THF-d8):

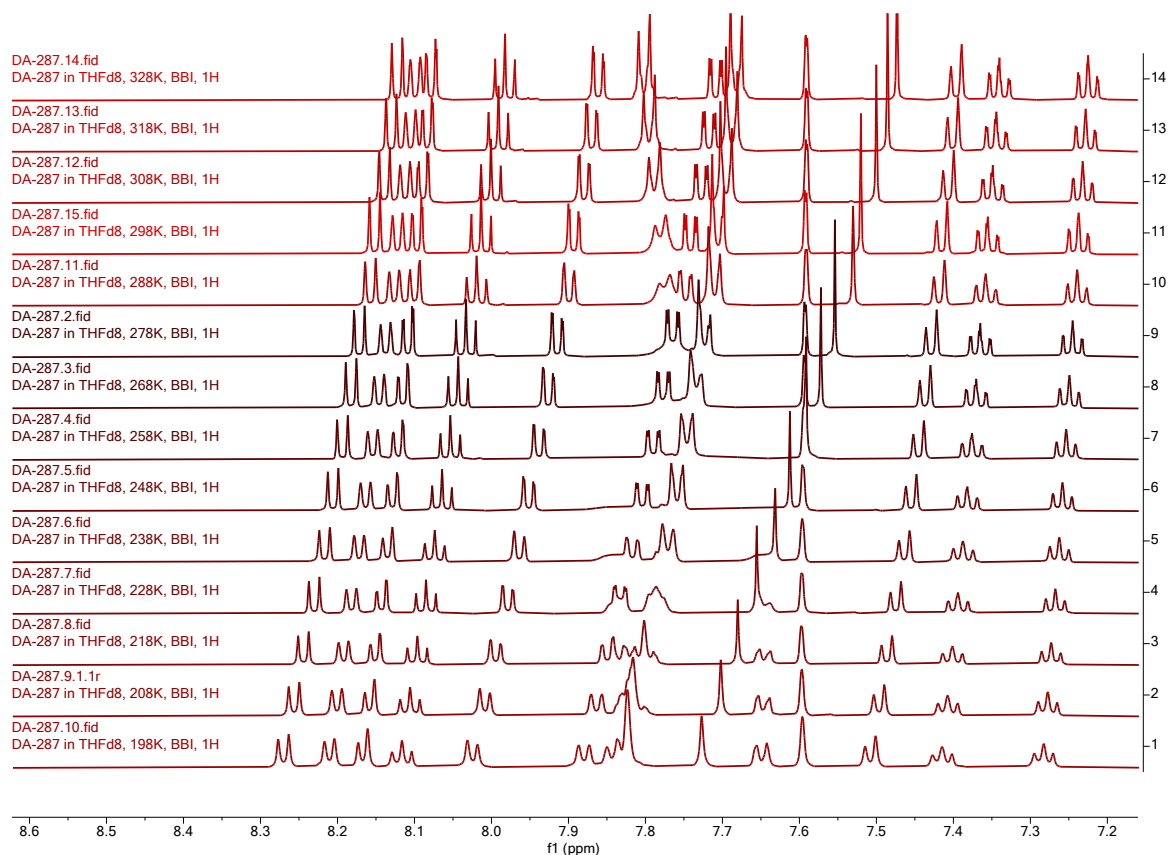

VT-NMR shows coalescence of protons H-17 and H-19 at 263 K. Unfortunately the protons H-16 and H-20 experience different temperature shifts, resulting in accidental isochrony, thus, preventing further analysis. The chemical shift difference for H-17 and H-19 was determined as 120.8 Hz.

The Eyring equation can be rewritten followingly to determine the rotational barrier<sup>[1]</sup>

$$\Delta G = RT_c \cdot \ln \frac{RT_c \sqrt{2}}{\pi N_A h |\nu_A - \nu_B|}$$

With  $T_c = 263$  K  $\Delta G$  the rotational barrier is determined as 51.8 kJ/mol. The uncertainty of the activation barrier is estimated to be  $\pm 1$  kJ/mol.

COSY: at 218 K

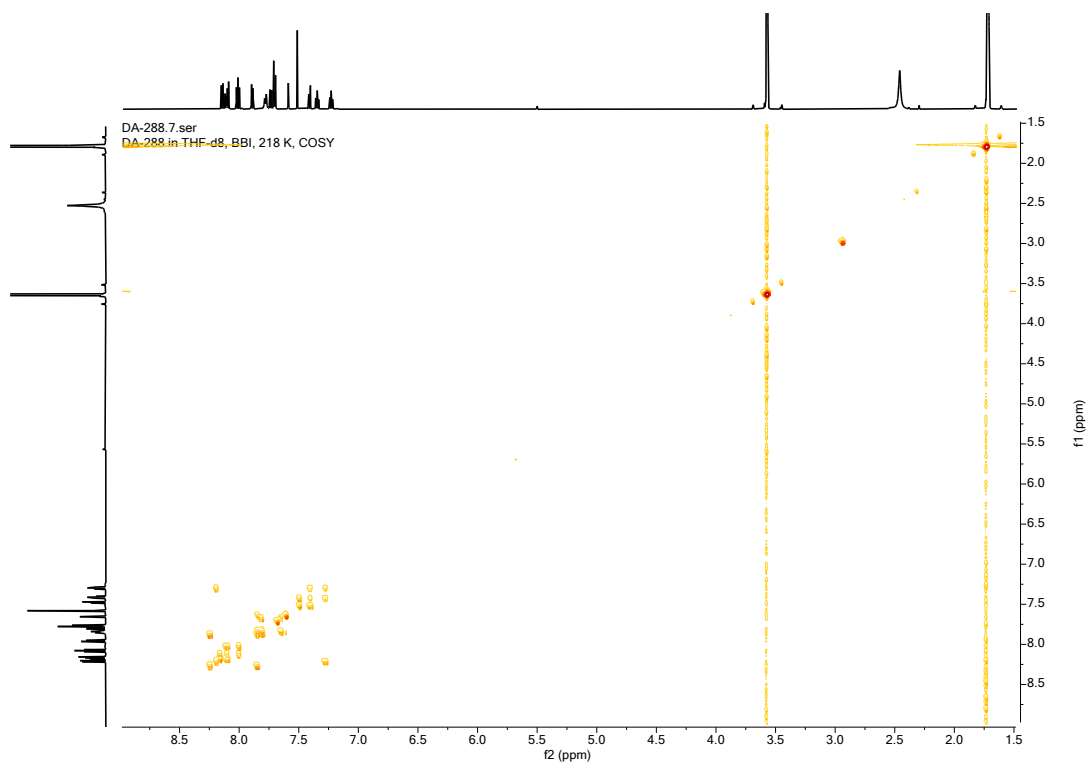

ROESY: at 218 K

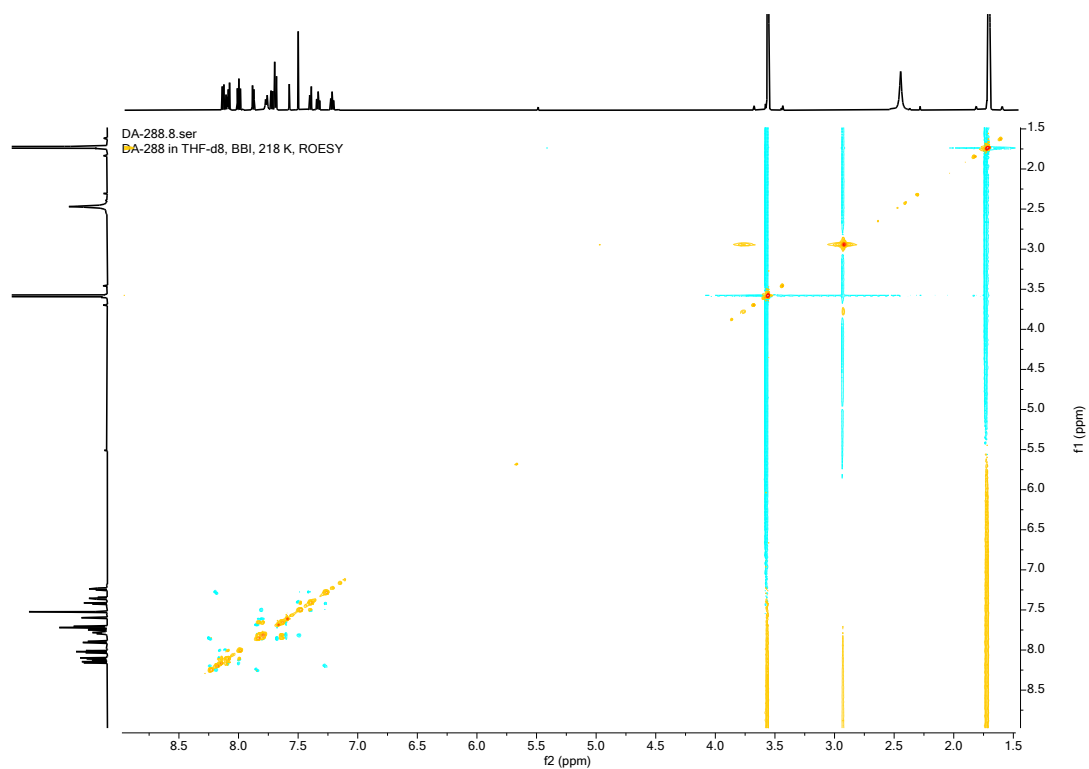

# HSQC: at 218 K

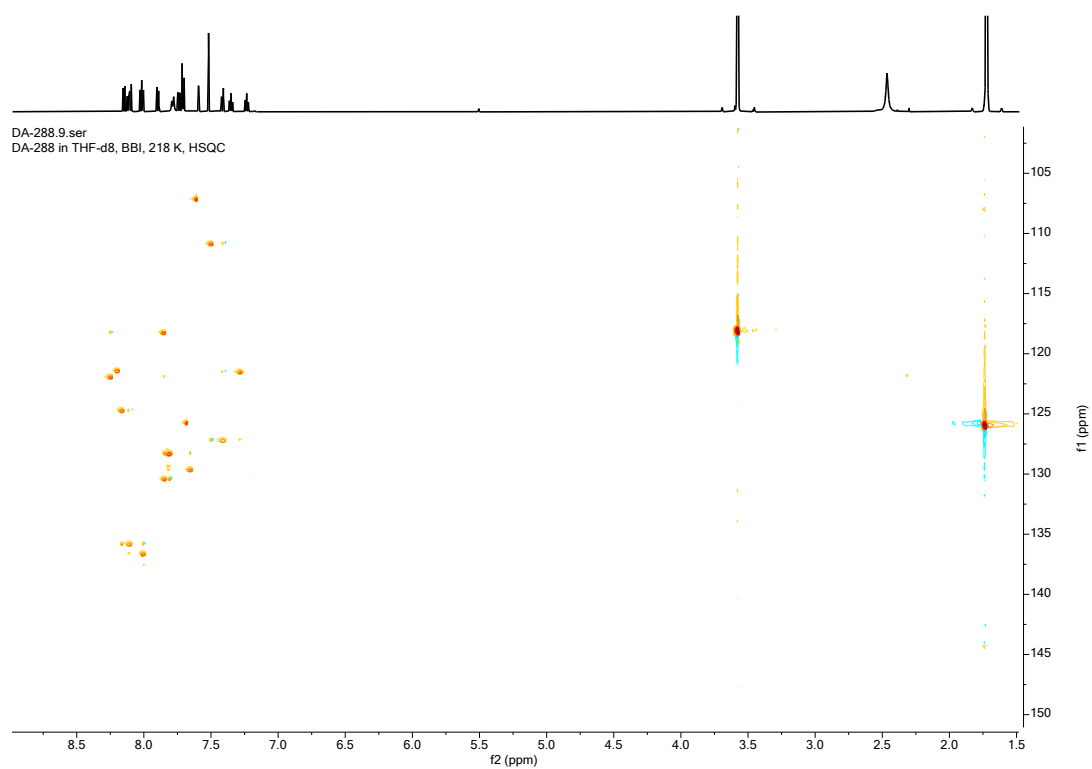

# HMBC: at 218 K

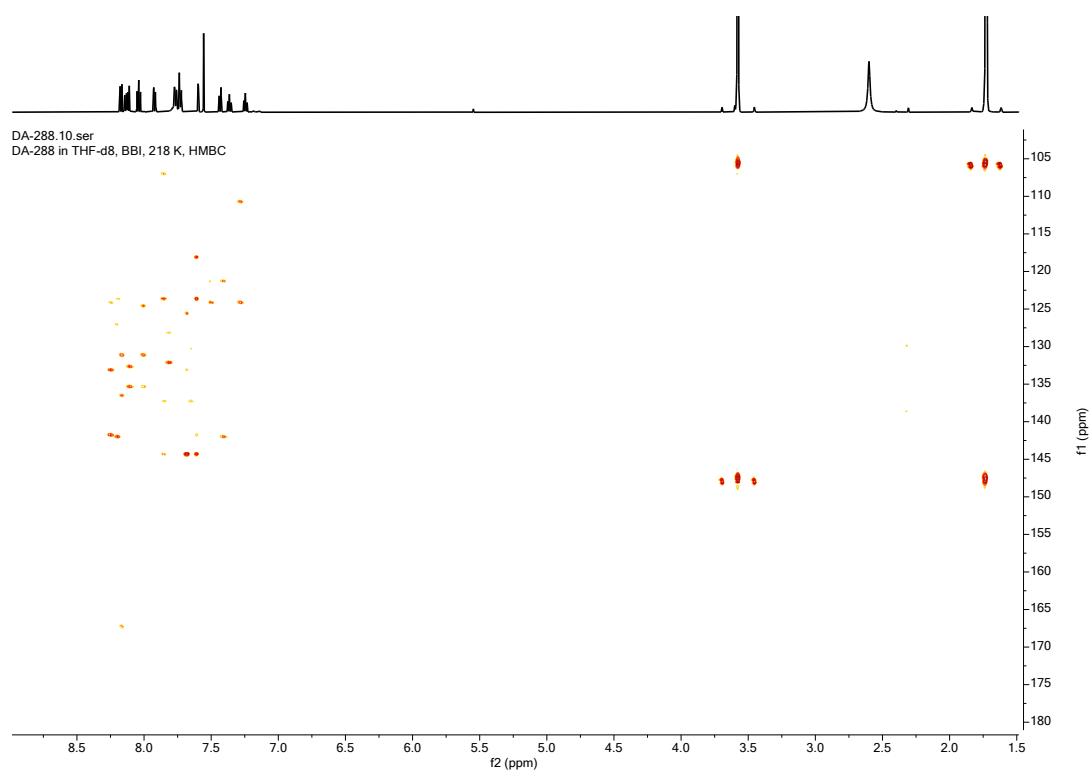

## Calculations and Structure Analysis

### Geometry Optimization and Conformer Analysis

Optimization, frequency analysis and TD-DFT calculations were performed using Gaussian 09 (E.01)<sup>2</sup>, automated conformational analysis was carried out using CREST<sup>3</sup> and the obtained structures submitted again to DFT optimization. For geometry optimization coordinates of (*P*)-**2** was extracted from the crystalstructure of (*rac*)-**2**. The initial guess for (*P*)-**1** was modeled from the optimized structure of (*P*)-**2**.

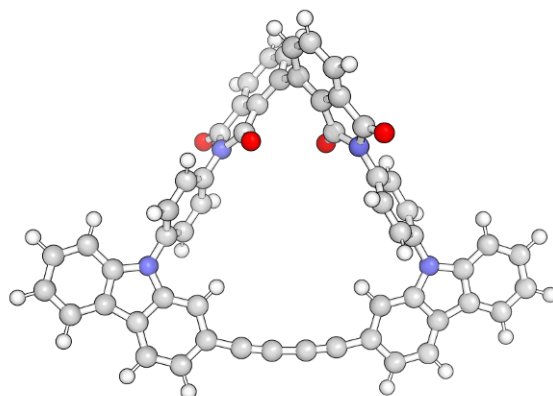

**Figure S6.** Optimized Geometry of (*P*)-**2** calculated with B3LYP/6311G\* level of theory.

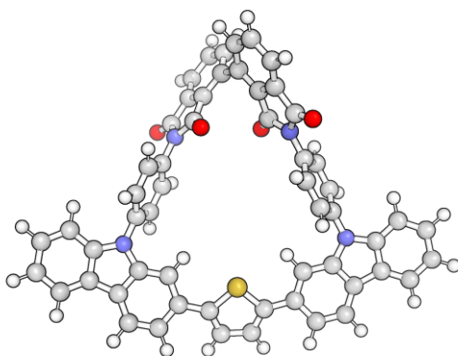

**Figure S7.** Optimized geometry of (*P*)-**1** calculated with B3LYP/6311G\* level of theory.

For both macrocycles automated conformation analysis was carried out within a 6 kcal/mol energy-window using CREST and yielded five conformers. Optimization on the same level as the initial guess reduced the ensemble to three conformers for (*P*)-**2** and four for (*P*)-**1**.

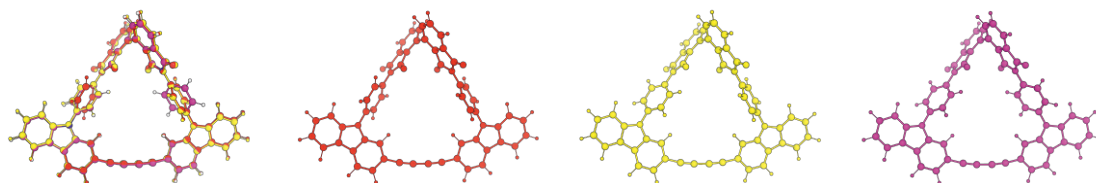

**Figure S8.** Optimized conformers of (*P*)-2 at the level of B3LYP/6311G(d,p), left all conformers overlapped, red conformer 1, yellow conformer 2, magenta conformer 3. Conformer 4 and 2 as well as conformer 5 and 1 from CREST converged to the same structure respectively.

**Table S1.** Boltzmann distribution of (*P*)-2

| Conformer | SP E [Hartree] | ZPC [Hartree] | corr E [Hartree] | Thermal corrections [Hartree] | G [Hartree]  | $p_i = e^{\frac{G_i - G_1}{kT}}$ | $\frac{p_i}{p_{tot}}$ | $\frac{p_i}{p_{tot}} * 100$ |
|-----------|----------------|---------------|------------------|-------------------------------|--------------|----------------------------------|-----------------------|-----------------------------|
| 1         | -2670.770101   | 0.683216      | -2670.086885     | 0.601458                      | -2670.168643 | 1                                | 0.967327278           | 96.73                       |
| 2         | -2670.767768   | 0.683657      | -2670.084111     | 0.602331                      | -2670.165437 | 0.033523056                      | 0.032427767           | 3.24                        |
| 3         | -2670.764627   | 0.684234      | -2670.080393     | 0.603803                      | -2670.160824 | 0.000253229                      | 0.000244955           | 0.02                        |

The conformers of (*P*)-2 vary in the orientation of the benzene bridge with a large population (96.73%) of the first conformer.

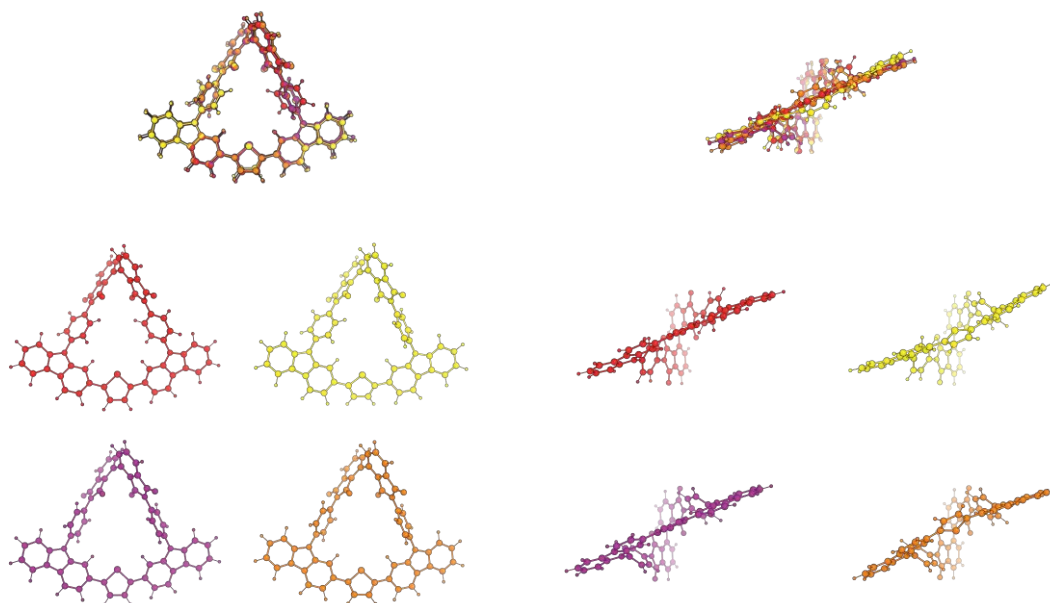

**Figure S9.** Optimized conformers of (*P*)-1 at the level of B3LYP/6311G(d,p), left topview, right frontview, top overlay geometries, red conformer 1, magenta conformer 2, yellow conformer 3, and orange conformer 5. Conformer 4 from CREST converged to the same geometry than conformer 2.

**Table S2.** Boltzmann distribution of (*P*)-1

| Conformer | SP E [Hartree] | ZPC [Hartree] | Corr E [Hartree] | Thermal corrections [Hartree] | G [Hartree]  | $p_i = e^{\frac{G_i - G_1}{kT}}$ | $\frac{p_i}{p_{tot}}$ | $\frac{p_i}{p_{tot}} * 100$ |
|-----------|----------------|---------------|------------------|-------------------------------|--------------|----------------------------------|-----------------------|-----------------------------|
| 1         | -3070.262991   | 0.7110579     | -3069.552412     | 0.62904                       | -3069.633951 | 0.000987                         | 0.000479259           | 0.047926                    |
| 2         | -3070.266079   | 0.7110131     | -3069.555948     | 0.628256                      | -3069.637823 | 0.059581                         | 0.028944461           | 2.894446                    |
| 3         | -3070.267977   | 0.709726      | -3069.558251     | 0.627493                      | -3069.640484 | 0.997884                         | 0.484774165           | 48.47742                    |
| 5         | -3070.267978   | 0.709726      | -3069.558252     | 0.627492                      | -3069.640486 | 1                                | 0.485802116           | 48.58021                    |

The conformers of (*P*)-1 vary in the orientation of the benzene bridge and in the orientation of the thiophene with a large population of 48.58% and 48.48% of the conformer 5 and 2, respectively. Rotation around the backbone ( $C_2$  symmetry operation) shows that conformers 5 and 3 are very similar with only minute differences.

## TD-DFT:

Vertical singlet transitions were calculated, for all the conformers of (*P*)-1 found, at the TD-B3LYP/6311G(d,p) level of theory, the Polarizable Continuum Model was used to take the effects of acetonitrile into account. SpecDis 1.71 was used to extract the transitions and fit the calculated data.<sup>4,5</sup> Only conformers with significant population (above 5% were taken into account). The minute difference between conformers 3 and 5 did not yield in different computed transitions.

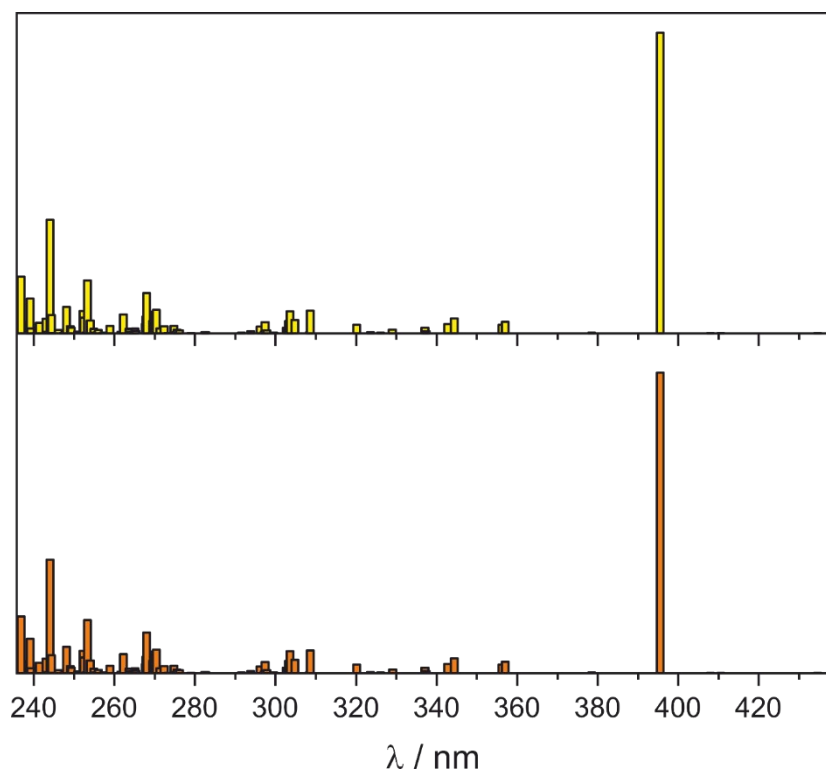**Figure S9.** Computed transitions as bar plot at TD-B3LYP/6-311G(d,p) level of theory. In yellow conformer 3 is depicted and in orange conformer 5 of (*P*)-1.

## X-Ray Structure and Optimized Geometries

Crystals of (*rac*)-**2** were obtained by slow vapor diffusion of n-hexane into a solution of  $\text{CHCl}_3$ .

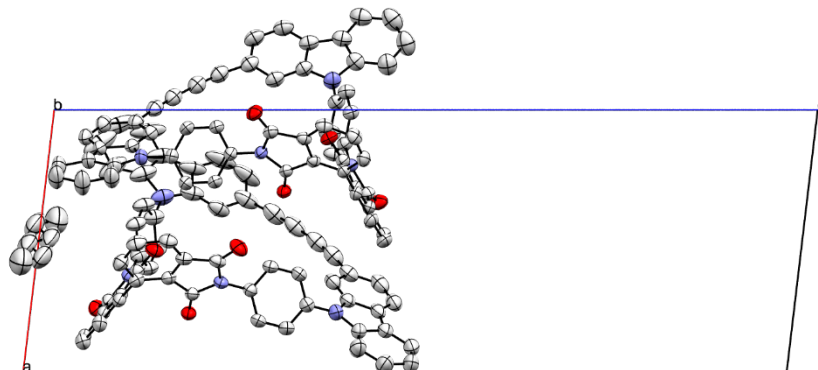

**Figure S10.** Unit cell of the crystal of *rac*-**2** obtained from slow diffusion of hexane to a solution of *rac*-**2** in chloroform. Visualized in the ORTEP representation with 50% probability. Hydrogens are omitted for clarity.

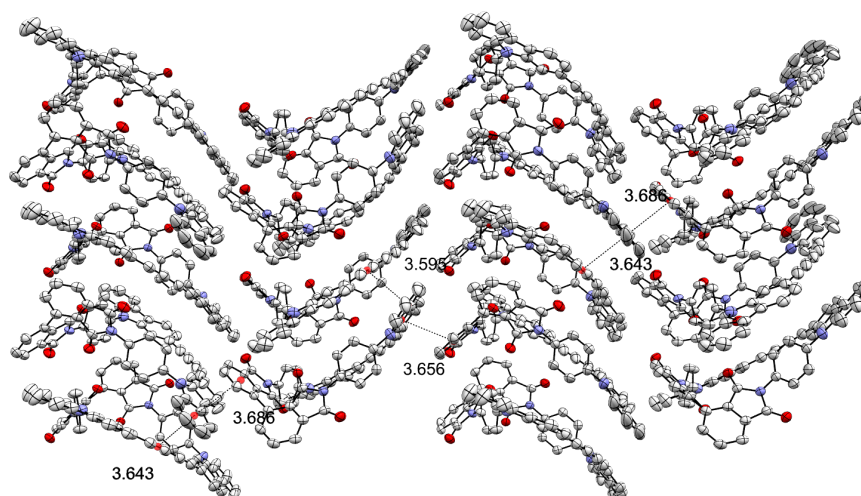

**Figure S11.** Herringbone-type packing of the crystal of *rac*-**2** obtained from slow diffusion of hexane to a solution of *rac*-**2** in chloroform. Close contacts which indicate weak  $\pi$ - $\pi$  interaction are illustrated.

**Mercury 2021.3.0** was used to measure the angles in the modeled structures of (*P*)-**1** and (*P*)-**2** as well as (*P*)-**2** extracted from the solid state structure above. Four centroids (dummy atoms) were calculated as pivots for measuring the angle between the rung and axis ( $\alpha$ ), the rung and bannister ( $\beta$ ), and as anchors for measuring the dihedral angle  $\phi_a$ . The pivot to measure  $\alpha$  was calculated as center point of benzene ring in the phthalimide subunit. For  $\beta$  the pivot was determined



as the middle point of the axis from C2 to C7 in a carbazole subunit. For  $\phi_a$  the centroids of the 7 membered scaffold of the individual phthalimides found in the axis were calculated. The dihedral angle was measured from these centroids over the CC bond connecting the phthalimides units. Two different dihedral angles  $\phi_i$  are found between rung and axis, the angles are measured from either C1 or C3 over N2 in the phthalimide subunit to the directly bond carbon and the closest C-ortho. As each dihedral angle exist twice we report the outer  $\phi_1$  and inner  $\phi_2$  as average in the main text. The same is found between rung and banister, with the dihedral angles span by either C8a or C9a over N9 to the bonded quaternary C of the rung and the closest C-ortho. As each dihedral angle exist twice we report the outer  $\phi_3$  and inner  $\phi_4$  as average in the main text.

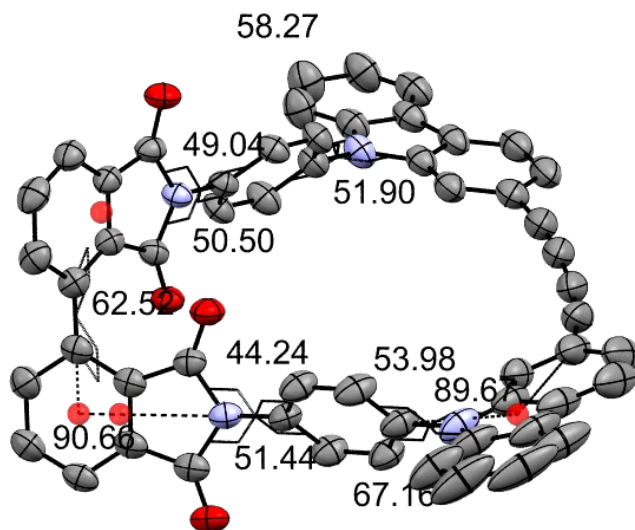

**Figure S12.** ORTEP representation of (*P*)-2 with the discussed angles, (*M*)-2 and solvents are omitted for clarity. Centroids are visualized as red spheres.

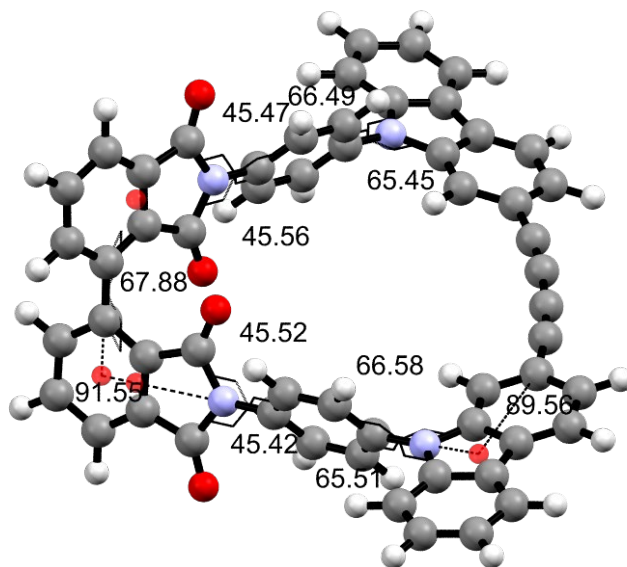

**Figure S13.** Optimized geometry of (*P*)-2 visualized in Mercury with the discussed angles. Centroids are visualized as red spheres.

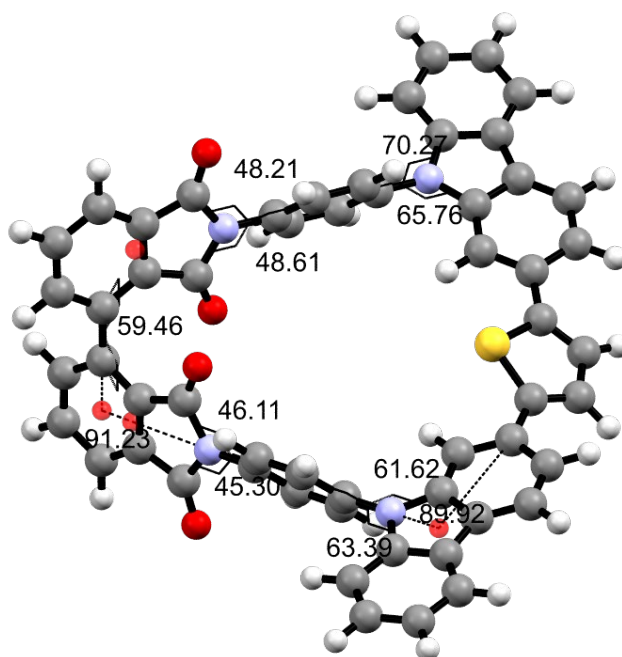

**Figure S14.** Optimized geometry of (*P*)-1 visualized in Mercury with the discussed angles. Centroids are visualized as red spheres.

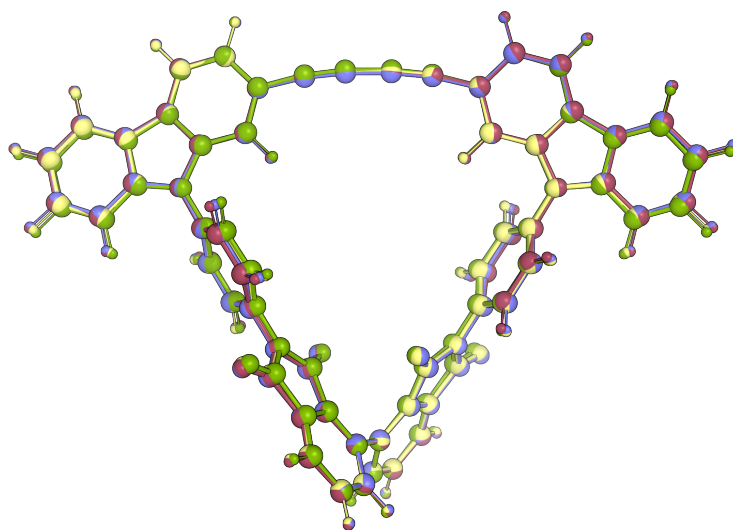

**Figure S15.** Optimized geometry of (*P*)-2 calculated with different functionals and basis-sets all staggered over each other. Red: B3LYP/cc-pVDZ. Green: M06-2X/6311G\*\*. Blue: B3LYP/631G\*\*. Yellow: wB97xd/6311G\*\*.

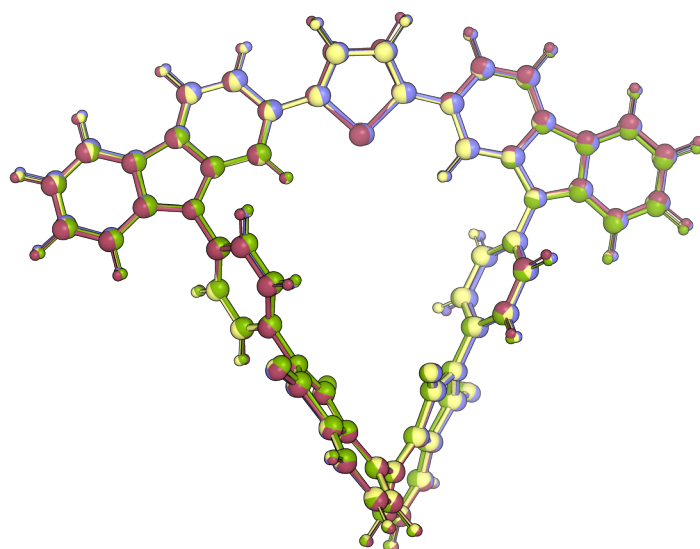

**Figure S16.** Optimized geometry of (*P*)-1 calculated with different functionals and basis-sets all staggered over each other. Red: B3LYP/cc-pVDZ. Green: M06-2X/6311G\*\*. Blue: B3LYP/631G\*\*. Yellow: wB97xd/6311G\*\*.

## Cartesians

Energies are reported in kcal/mol.

### Macrocycle 2

```
92
da-276-P-6311.out      Energy: -1676279.7370661
O      1.48606      3.01066      -0.80796
O      3.56890      3.19658      3.29514
O      -1.48678      3.01085      0.80811
O      -3.56889      3.19625      -3.29536
N      2.72146      2.78220      1.15662
N      5.56358      -1.92368      -0.10581
N      -5.56346      -1.92404      0.10546
N      -2.72174      2.78212      -1.15670
C      1.77795      3.39751      0.29543
C      1.27407      4.59511      1.03399
C      0.35825      5.57582      0.65264
C      0.14801      6.62165      1.56701
H      -0.56031      7.40282      1.31136
C      0.80230      6.67114      2.79939
H      0.59723      7.49426      3.47540
C      1.70810      5.67581      3.16876
H      2.22662      5.69483      4.12045
C      1.92617      4.65364      2.26096
C      2.84941      3.49157      2.37474
C      3.45230      1.60036      0.83804
C      4.05412      1.46291      -0.41497
H      3.95302      2.24702      -1.15340
C      4.75286      0.30165      -0.72559
H      5.19609      0.17889      -1.70732
C      4.87530      -0.71987      0.21794
C      4.28895      -0.56933      1.47618
H      4.39216      -1.35908      2.21152
C      3.57036      0.57954      1.78370
H      3.11683      0.68967      2.75949
C      6.92702      -2.06089      -0.37091
C      7.93077      -1.09229      -0.36510
H      7.71095      -0.05579      -0.13583
C      9.22665      -1.50334      -0.65753
H      10.02601      -0.76934      -0.65962
C      9.52194      -2.84521      -0.94585
H      10.54401      -3.13112      -1.17061
C      8.52031      -3.80729      -0.94211
H      8.75504      -4.84453      -1.15970
C      7.20681      -3.42342      -0.65204
C      4.96458      -3.17873      -0.21989
C      5.95371      -4.13731      -0.55512
C      5.57132      -5.47255      -0.73206
H      6.30897      -6.22685      -0.98659
C      4.24002      -5.83010      -0.58948
H      3.93286      -6.85999      -0.72875
C      3.25693      -4.86073      -0.27276
C      3.62659      -3.51815      -0.08281
H      2.87279      -2.77749      0.15223
C      1.88156      -5.18757      -0.15965
C      0.67548      -5.30798      -0.05564
C      -0.67510      -5.30805      0.05536
C      -1.88120      -5.18770      0.15929
C      -4.96436      -3.17907      0.21948
C      -3.62639      -3.51845      0.08222
H      -2.87263      -2.77781      -0.15299
C      -3.25660      -4.86097      0.27237
C      -4.23958      -5.83035      0.58938
H      -3.93234      -6.86020      0.72886
C      -5.57087      -5.47284      0.73216
H      -6.30843      -6.22713      0.98700
C      -5.95336      -4.13765      0.55509
C      -6.92681      -2.06129      0.37110
C      -7.20645      -3.42381      0.65240
```

```
C      -8.51983      -3.80774      0.94287
H      -8.75446      -4.84500      1.16051
C      -9.52152      -2.84572      0.94688
H      -10.54350      -3.13170      1.17195
C      -9.22640      -1.50386      0.65839
H      -10.02579      -0.76989      0.66072
C      -7.93063      -1.09275      0.36553
H      -7.71098      -0.05627      0.13604
C      -4.87529      -0.72019      -0.21822
C      -4.75409      0.30189      0.72489
H      -5.19816      0.17948      1.70630
C      -4.05544      1.46321      0.41432
H      -3.95532      2.24776      1.15242
C      -3.45249      1.60021      -0.83819
C      -3.56931      0.57887      -1.78343
H      -3.11489      0.68867      -2.75884
C      -4.28782      -0.57008      -1.47599
H      -4.39016      -1.36019      -2.21108
C      -1.77859      3.39765      -0.29531
C      -1.27455      4.59515      -1.03394
C      -0.35870      5.57585      -0.65261
C      -0.14841      6.62164      -1.56699
H      0.55991      7.40281      -1.31133
C      -0.80265      6.67111      -2.79941
H      -0.59755      7.49423      -3.47541
C      -1.70840      5.67575      -3.16880
H      -2.22683      5.69467      -4.12055
C      -1.92653      4.65362      -2.26097
C      -2.84950      3.49134      -2.37491
```

```
92
da276-P-prop1.out      Energy: -1676310.9479878
O      -1.48709      3.01139      0.80895
O      -3.56719      3.19465      -3.29580
O      1.48710      3.01139      -0.80896
O      3.56719      3.19465      3.29580
N      -2.72155      2.78129      -1.15623
N      -5.56406      -1.92283      0.10774
N      5.56406      -1.92284      -0.10774
N      2.72155      2.78129      1.15623
C      -1.77852      3.39715      -0.29504
C      -1.27374      4.59397      -1.03411
C      -0.35800      5.57471      -0.65295
C      -0.14620      6.61952      -1.56801
H      0.56124      7.40008      -1.31202
C      -0.79968      6.66811      -2.80071
H      -0.59381      7.48988      -3.47658
C      -1.70565      5.67310      -3.17023
H      -2.22328      5.69103      -4.12134
C      -1.92483      4.65208      -2.26154
C      -2.84826      3.48994      -2.37503
C      -3.45306      1.59983      -0.83718
C      -4.04364      1.45821      0.42065
H      -3.93200      2.23786      1.16092
C      -4.74229      0.29716      0.73163
H      -5.17747      0.17025      1.71540
C      -4.87591      -0.71852      -0.21640
C      -4.30137      -0.56349      -1.47934
H      -4.41330      -1.34911      -2.21649
C      -3.58228      0.58472      -1.78744
H      -3.13841      0.70053      -2.76601
C      -6.92751      -2.06073      0.37156
C      -7.93142      -1.09243      0.36547
H      -7.71101      -0.05686      0.13769
C      -9.22711      -1.50453      0.65704
```

|   |           |          |          |
|---|-----------|----------|----------|
| H | -10.02624 | -0.77191 | 0.65927  |
| C | -9.52187  | -2.84660 | 0.94452  |
| H | -10.54299 | -3.13243 | 1.16812  |
| C | -8.52001  | -3.80842 | 0.94114  |
| H | -8.75328  | -4.84494 | 1.15798  |
| C | -7.20676  | -3.42349 | 0.65209  |
| C | -4.96434  | -3.17734 | 0.22176  |
| C | -5.95313  | -4.13666 | 0.55592  |
| C | -5.57069  | -5.47180 | 0.73233  |
| H | -6.30812  | -6.22511 | 0.98567  |
| C | -4.23924  | -5.82863 | 0.58991  |
| H | -3.93089  | -6.85714 | 0.72832  |
| C | -3.25684  | -4.85839 | 0.27401  |
| C | -3.62610  | -3.51568 | 0.08492  |
| H | -2.87337  | -2.77535 | -0.15006 |
| C | -1.88129  | -5.18506 | 0.16042  |
| C | -0.67527  | -5.30572 | 0.05585  |
| C | 0.67527   | -5.30572 | -0.05586 |
| C | 1.88128   | -5.18505 | -0.16043 |
| C | 4.96434   | -3.17734 | -0.22176 |
| C | 3.62609   | -3.51568 | -0.08492 |
| H | 2.87337   | -2.77535 | 0.15005  |
| C | 3.25683   | -4.85839 | -0.27401 |
| C | 4.23923   | -5.82863 | -0.58991 |
| H | 3.93088   | -6.85714 | -0.72832 |
| C | 5.57069   | -5.47181 | -0.73233 |
| H | 6.30811   | -6.22511 | -0.98566 |
| C | 5.95313   | -4.13666 | -0.55592 |
| C | 6.92751   | -2.06073 | -0.37156 |
| C | 7.20676   | -3.42350 | -0.65209 |
| C | 8.52001   | -3.80843 | -0.94113 |
| H | 8.75328   | -4.84495 | -1.15798 |
| C | 9.52187   | -2.84661 | -0.94452 |
| H | 10.54299  | -3.13244 | -1.16812 |
| C | 9.22711   | -1.50454 | -0.65704 |
| H | 10.02624  | -0.77192 | -0.65927 |
| C | 7.93143   | -1.09244 | -0.36547 |
| H | 7.71101   | -0.05686 | -0.13770 |
| C | 4.87591   | -0.71852 | 0.21640  |
| C | 4.74229   | 0.29716  | -0.73163 |
| H | 5.17747   | 0.17025  | -1.71540 |
| C | 4.04364   | 1.45821  | -0.42065 |
| H | 3.93200   | 2.23786  | -1.16092 |
| C | 3.45307   | 1.59983  | 0.83718  |
| C | 3.58228   | 0.58472  | 1.78744  |
| H | 3.13841   | 0.70054  | 2.76601  |
| C | 4.30137   | -0.56349 | 1.47934  |
| H | 4.41331   | -1.34911 | 2.21649  |
| C | 1.77852   | 3.39715  | 0.29504  |
| C | 1.27374   | 4.59397  | 1.03411  |
| C | 0.35800   | 5.57471  | 0.65295  |
| C | 0.14620   | 6.61952  | 1.56801  |
| H | -0.56124  | 7.40008  | 1.31202  |
| C | 0.79968   | 6.66810  | 2.80071  |
| H | 0.59381   | 7.48987  | 3.47658  |
| C | 1.70565   | 5.67310  | 3.17023  |
| H | 2.22328   | 5.69103  | 4.12134  |
| C | 1.92483   | 4.65208  | 2.26154  |
| C | 2.84827   | 3.48994  | 2.37503  |

92

da276-P-prop2.out Energy: -1676310.0324138

|   |          |          |          |
|---|----------|----------|----------|
| O | 1.49658  | 2.97146  | -0.79848 |
| O | 3.62900  | 3.19368  | 3.27639  |
| O | -1.49284 | 3.17458  | 0.86795  |
| O | -3.43906 | 3.17141  | -3.31734 |
| N | 2.75374  | 2.76018  | 1.15318  |
| N | 5.50603  | -2.00558 | -0.08360 |
| N | -5.58492 | -1.84749 | 0.18815  |
| N | -2.68508 | 2.83180  | -1.11961 |
| C | 1.81652  | 3.38047  | 0.28950  |
| C | 1.35466  | 4.60852  | 1.00396  |
| C | 0.46264  | 5.60489  | 0.60679  |

|   |           |          |          |
|---|-----------|----------|----------|
| C | 0.28401   | 6.67395  | 1.49969  |
| H | -0.40399  | 7.46755  | 1.23127  |
| C | 0.94690   | 6.73056  | 2.72728  |
| H | 0.76682   | 7.57125  | 3.38703  |
| C | 1.82958   | 5.72059  | 3.11283  |
| H | 2.35342   | 5.74609  | 4.06034  |
| C | 2.01654   | 4.67467  | 2.22527  |
| C | 2.91023   | 3.49053  | 2.35621  |
| C | 3.45818   | 1.55965  | 0.84350  |
| C | 4.04161   | 1.39741  | -0.41522 |
| H | 3.94483   | 2.17478  | -1.16005 |
| C | 4.71677   | 0.22117  | -0.71966 |
| H | 5.14994   | 0.07977  | -1.70234 |
| C | 4.83225   | -0.79067 | 0.23476  |
| C | 4.26255   | -0.61724 | 1.49729  |
| H | 4.36057   | -1.40077 | 2.23870  |
| C | 3.56845   | 0.54848  | 1.80014  |
| H | 3.13040   | 0.68089  | 2.77942  |
| C | 6.87582   | -2.16271 | -0.29879 |
| C | 7.89538   | -1.21350 | -0.22957 |
| H | 7.68421   | -0.17997 | 0.01568  |
| C | 9.19394   | -1.64239 | -0.48145 |
| H | 10.00547  | -0.92506 | -0.43421 |
| C | 9.47584   | -2.98224 | -0.79148 |
| H | 10.49973  | -3.28148 | -0.98247 |
| C | 8.45773   | -3.92490 | -0.85195 |
| H | 8.68087   | -4.95979 | -1.08649 |
| C | 7.14118   | -3.52262 | -0.60426 |
| C | 4.88791   | -3.24457 | -0.25423 |
| C | 5.87199   | -4.21349 | -0.57578 |
| C | 5.47380   | -5.53641 | -0.80123 |
| H | 6.20723   | -6.29616 | -1.04676 |
| C | 4.13229   | -5.87264 | -0.71657 |
| H | 3.81167   | -6.89163 | -0.89233 |
| C | 3.15556   | -4.89367 | -0.40996 |
| C | 3.53992   | -3.56236 | -0.17389 |
| H | 2.79216   | -2.81476 | 0.05438  |
| C | 1.77355   | -5.20588 | -0.34572 |
| C | 0.56539   | -5.32733 | -0.27115 |
| C | -0.78617  | -5.32793 | -0.17175 |
| C | -1.99127  | -5.20591 | -0.05769 |
| C | -5.01095  | -3.12325 | 0.22390  |
| C | -3.69591  | -3.49993 | -0.00965 |
| H | -2.93231  | -2.78039 | -0.26769 |
| C | -3.35688  | -4.85879 | 0.10731  |
| C | -4.35130  | -5.81601 | 0.42117  |
| H | -4.06741  | -6.85735 | 0.50506  |
| C | -5.66576  | -5.42876 | 0.62626  |
| H | -6.41850  | -6.17265 | 0.86150  |
| C | -6.01265  | -4.07567 | 0.53589  |
| C | -6.94787  | -1.97452 | 0.47811  |
| C | -7.24779  | -3.34363 | 0.69576  |
| C | -8.55414  | -3.72106 | 1.02197  |
| H | -8.79743  | -4.76402 | 1.19149  |
| C | -9.53341  | -2.74298 | 1.13236  |
| H | -10.55002 | -3.02218 | 1.38312  |
| C | -9.21697  | -1.39105 | 0.92943  |
| H | -9.99321  | -0.64119 | 1.03183  |
| C | -7.92665  | -0.98756 | 0.60361  |
| H | -7.69240  | 0.05961  | 0.46277  |
| C | -4.88744  | -0.64734 | -0.11089 |
| C | -5.36031  | 0.23446  | -1.08491 |
| H | -6.27509  | 0.00766  | -1.61788 |
| C | -4.65761  | 1.39269  | -1.39549 |
| H | -5.03428  | 2.05199  | -2.16121 |
| C | -3.43775  | 1.66915  | -0.76505 |
| C | -2.96084  | 0.78600  | 0.21100  |
| H | -2.03673  | 0.99309  | 0.72609  |
| C | -3.69357  | -0.34414 | 0.54801  |
| H | -3.32805  | -1.00044 | 1.32729  |
| C | -1.75155  | 3.48498  | -0.26839 |
| C | -1.19264  | 4.62231  | -1.05447 |
| C | -0.25173  | 5.58878  | -0.70015 |

|   |          |         |          |
|---|----------|---------|----------|
| C | 0.00766  | 6.58400 | -1.65678 |
| H | 0.73564  | 7.35306 | -1.42453 |
| C | -0.62129 | 6.59319 | -2.90363 |
| H | -0.37886 | 7.37653 | -3.61222 |
| C | -1.54518 | 5.60543 | -3.24778 |
| H | -2.03849 | 5.58970 | -4.21168 |
| C | -1.81413 | 4.63765 | -2.29509 |
| C | -2.75277 | 3.48735 | -2.37786 |

92

da276-P-prop3.out Energy: -1676308.9854645

|   |          |          |          |
|---|----------|----------|----------|
| O | 1.51895  | 3.14774  | -0.85737 |
| O | 3.45571  | 3.16602  | 3.33341  |
| O | -1.51896 | 3.14774  | 0.85736  |
| O | -3.45572 | 3.16602  | -3.33341 |
| N | 2.70259  | 2.80681  | 1.13704  |
| N | 5.52800  | -1.92998 | -0.14791 |
| N | -5.52799 | -1.92999 | 0.14792  |
| N | -2.70261 | 2.80681  | -1.13704 |
| C | 1.78993  | 3.47265  | 0.27246  |
| C | 1.26437  | 4.64124  | 1.03395  |
| C | 0.35070  | 5.62554  | 0.65709  |
| C | 0.11468  | 6.64518  | 1.59281  |
| H | -0.59154 | 7.42898  | 1.34354  |
| C | 0.73967  | 6.66010  | 2.84193  |
| H | 0.51588  | 7.46263  | 3.53498  |
| C | 1.63478  | 5.65415  | 3.20929  |
| H | 2.12255  | 5.64348  | 4.17605  |
| C | 1.88130  | 4.66132  | 2.27624  |
| C | 2.78453  | 3.48479  | 2.38405  |
| C | 3.42979  | 1.62163  | 0.79949  |
| C | 4.61914  | 1.30093  | 1.46735  |
| H | 4.98827  | 1.93842  | 2.25463  |
| C | 5.30145  | 0.12912  | 1.16183  |
| H | 6.19212  | -0.12807 | 1.72118  |
| C | 4.84165  | -0.72505 | 0.15725  |
| C | 3.67636  | -0.38260 | -0.53227 |
| H | 3.32017  | -1.01568 | -1.33472 |
| C | 2.96228  | 0.76168  | -0.20253 |
| H | 2.06393  | 0.99999  | -0.74805 |
| C | 6.89767  | -2.06853 | -0.40101 |
| C | 7.89430  | -1.09350 | -0.46454 |
| H | 7.67152  | -0.04780 | -0.29742 |
| C | 9.18800  | -1.50629 | -0.76423 |
| H | 9.97774  | -0.76556 | -0.81852 |
| C | 9.49095  | -2.85563 | -1.00170 |
| H | 10.51065 | -3.14242 | -1.23036 |
| C | 8.49439  | -3.82112 | -0.95396 |
| H | 8.72723  | -4.86165 | -1.15083 |
| C | 7.18424  | -3.43379 | -0.65577 |
| C | 4.93630  | -3.19456 | -0.24780 |
| C | 5.93413  | -4.15105 | -0.56062 |
| C | 5.57254  | -5.49491 | -0.70952 |
| H | 6.32264  | -6.24090 | -0.94650 |
| C | 4.24725  | -5.86975 | -0.56023 |
| H | 3.95208  | -6.90335 | -0.68887 |
| C | 3.25618  | -4.90957 | -0.24490 |
| C | 3.60904  | -3.56012 | -0.07061 |
| H | 2.84684  | -2.83909 | 0.18761  |
| C | 1.88339  | -5.24813 | -0.12942 |
| C | 0.67622  | -5.37307 | -0.04413 |
| C | -0.67620 | -5.37307 | 0.04409  |
| C | -1.88337 | -5.24813 | 0.12939  |
| C | -4.93628 | -3.19457 | 0.24780  |
| C | -3.60903 | -3.56012 | 0.07060  |
| H | -2.84684 | -2.83909 | -0.18762 |
| C | -3.25616 | -4.90957 | 0.24488  |
| C | -4.24723 | -5.86976 | 0.56021  |
| H | -3.95205 | -6.90336 | 0.68884  |
| C | -5.57252 | -5.49493 | 0.70951  |
| H | -6.32261 | -6.24092 | 0.94649  |
| C | -5.93411 | -4.15106 | 0.56062  |
| C | -6.89767 | -2.06855 | 0.40102  |

|   |           |          |          |
|---|-----------|----------|----------|
| C | -7.18422  | -3.43380 | 0.65578  |
| C | -8.49437  | -3.82115 | 0.95398  |
| H | -8.72721  | -4.86168 | 1.15084  |
| C | -9.49094  | -2.85566 | 1.00172  |
| H | -10.51063 | -3.14245 | 1.23039  |
| C | -9.18799  | -1.50631 | 0.76427  |
| H | -9.97773  | -0.76559 | 0.81856  |
| C | -7.89429  | -1.09352 | 0.46457  |
| H | -7.67152  | -0.04782 | 0.29746  |
| C | -4.84165  | -0.72506 | -0.15724 |
| C | -3.67635  | -0.38261 | 0.53227  |
| H | -3.32016  | -1.01568 | 1.33472  |
| C | -2.96228  | 0.76168  | 0.20252  |
| H | -2.06393  | 0.99999  | 0.74804  |
| C | -3.42980  | 1.62162  | -0.79949 |
| C | -4.61915  | 1.30092  | -1.46734 |
| H | -4.98829  | 1.93842  | -2.25462 |
| C | -5.30146  | 0.12911  | -1.16182 |
| H | -6.19214  | -0.12808 | -1.72116 |
| C | -1.78994  | 3.47265  | -0.27246 |
| C | -1.26438  | 4.64124  | -1.03395 |
| C | -0.35071  | 5.62554  | -0.65710 |
| C | -0.11470  | 6.64518  | -1.59282 |
| H | 0.59153   | 7.42898  | -1.34355 |
| C | -0.73969  | 6.66010  | -2.84194 |
| H | -0.51590  | 7.46263  | -3.53498 |
| C | -1.63480  | 5.65415  | -3.20930 |
| H | -2.12257  | 5.64348  | -4.17606 |
| C | -1.88132  | 4.66131  | -2.27624 |
| C | -2.78455  | 3.48479  | -2.38405 |

## Macrocycle 1

95

da-288-P-6311.out Energy: -1926982.2877855

|   |          |          |          |
|---|----------|----------|----------|
| O | -1.49666 | 3.37146  | 0.81743  |
| O | -3.70327 | 3.36718  | -3.22194 |
| O | 1.27061  | 3.41775  | -0.90084 |
| O | 3.41963  | 3.59654  | 3.16490  |
| N | -2.75518 | 3.03099  | -1.11267 |
| N | -5.03403 | -1.94591 | 0.24291  |
| N | 5.14852  | -1.66600 | -0.13659 |
| N | 2.51275  | 3.17436  | 1.05365  |
| C | -1.84019 | 3.72391  | -0.28298 |
| C | -1.44423 | 4.94716  | -1.04535 |
| C | -0.57254 | 5.98325  | -0.70758 |
| C | -0.46785 | 7.03535  | -1.63287 |
| C | -1.17900 | 7.03822  | -2.83434 |
| C | -2.03339 | 5.98485  | -3.16328 |
| C | -2.14742 | 4.95497  | -2.24489 |
| C | -2.98088 | 3.72325  | -2.32571 |
| C | -3.34945 | 1.78028  | -0.77381 |
| C | -3.88633 | 1.58135  | 0.49984  |
| C | -4.43582 | 0.34968  | 0.83648  |
| C | -4.47694 | -0.68365 | -0.10144 |
| C | -3.95739 | -0.47272 | -1.38072 |
| C | -3.38473 | 0.74850  | -1.71409 |
| C | -6.36360 | -2.18829 | 0.59908  |
| C | -7.42944 | -1.29454 | 0.70344  |
| C | -8.67004 | -1.80677 | 1.06852  |
| C | -8.85111 | -3.17554 | 1.31989  |
| C | -7.78860 | -4.06294 | 1.20383  |
| C | -6.52960 | -3.57577 | 0.83896  |
| C | -4.34468 | -3.16063 | 0.25660  |
| C | -5.24258 | -4.19491 | 0.61625  |
| C | -4.76350 | -5.50638 | 0.69473  |
| C | -3.42783 | -5.76404 | 0.42962  |
| C | -2.53175 | -4.72602 | 0.08113  |
| C | -3.00052 | -3.40850 | -0.00377 |
| C | 4.54166  | -2.91688 | -0.26117 |
| C | 3.18801  | -3.23698 | -0.24675 |
| C | 2.80918  | -4.57673 | -0.40991 |

|                                                 |          |          |          |   |          |          |          |
|-------------------------------------------------|----------|----------|----------|---|----------|----------|----------|
| C                                               | 3.81279  | -5.56156 | -0.58100 | C | -0.78250 | 7.07437  | -2.82707 |
| C                                               | 5.15672  | -5.23008 | -0.62008 | C | -1.62074 | 6.02850  | -3.21657 |
| C                                               | 5.54446  | -3.89522 | -0.46577 | C | -1.82264 | 5.01022  | -2.29993 |
| C                                               | 6.53070  | -1.83021 | -0.25837 | C | -2.64570 | 3.77803  | -2.43879 |
| C                                               | 6.81348  | -3.20408 | -0.46634 | C | -3.16980 | 1.84521  | -0.89093 |
| C                                               | 8.14216  | -3.61542 | -0.61280 | C | -4.33987 | 1.45608  | -1.55462 |
| C                                               | 9.15595  | -2.66787 | -0.54587 | C | -4.94372 | 0.24033  | -1.25438 |
| C                                               | 8.85678  | -1.31387 | -0.32936 | C | -4.42392 | -0.59045 | -0.25889 |
| C                                               | 7.54474  | -0.87598 | -0.18118 | C | -3.26598 | -0.19031 | 0.41189  |
| C                                               | 4.47994  | -0.44412 | 0.15848  | C | -2.63002 | 0.99960  | 0.08659  |
| C                                               | 4.43666  | 0.58169  | -0.78697 | C | -6.41351 | -1.97893 | 0.39116  |
| C                                               | 3.79654  | 1.78027  | -0.49163 | C | -7.43864 | -1.03336 | 0.43759  |
| C                                               | 3.17795  | 1.95103  | 0.74815  | C | -8.70602 | -1.46638 | 0.81357  |
| C                                               | 3.20890  | 0.92342  | 1.69265  | C | -8.95434 | -2.80714 | 1.14229  |
| C                                               | 3.86666  | -0.26509 | 1.40021  | C | -7.92766 | -3.74192 | 1.11383  |
| C                                               | 1.58103  | 3.80800  | 0.19652  | C | -6.64355 | -3.33262 | 0.74204  |
| C                                               | 1.12197  | 5.02907  | 0.92728  | C | -4.41898 | -3.05116 | 0.23475  |
| C                                               | 0.20865  | 6.01748  | 0.55813  | C | -5.37276 | -4.01163 | 0.64687  |
| C                                               | 0.05158  | 7.08696  | 1.45567  | C | -4.95377 | -5.32537 | 0.87842  |
| C                                               | 0.75087  | 7.15016  | 2.66247  | C | -3.62099 | -5.65916 | 0.70938  |
| C                                               | 1.64437  | 6.14140  | 3.02530  | C | -2.66885 | -4.70416 | 0.27835  |
| C                                               | 1.81100  | 5.09563  | 2.13329  | C | -3.08569 | -3.38982 | 0.02419  |
| C                                               | 2.69402  | 3.90232  | 2.25305  | C | 4.41893  | -3.05121 | -0.23476 |
| C                                               | -1.12558 | -5.03741 | -0.19285 | C | 3.08565  | -3.38986 | -0.02415 |
| C                                               | -0.59006 | -6.15210 | -0.79171 | C | 2.66878  | -4.70420 | -0.27829 |
| C                                               | 0.81994  | -6.10929 | -0.92519 | C | 3.62089  | -5.65921 | -0.70935 |
| C                                               | 1.39622  | -4.96436 | -0.42439 | C | 4.95367  | -5.32543 | -0.87843 |
| S                                               | 0.15341  | -3.92447 | 0.24556  | C | 5.37268  | -4.01170 | -0.64689 |
| H                                               | 0.20562  | 7.85761  | -1.41442 | C | 6.41348  | -1.97901 | -0.39122 |
| H                                               | -1.05503 | 7.86874  | -3.52100 | C | 6.64349  | -3.33271 | -0.74210 |
| H                                               | -2.58834 | 5.96447  | -4.09419 | C | 7.92758  | -3.74203 | -1.11392 |
| H                                               | -3.84810 | 2.37504  | 1.23374  | C | 8.95427  | -2.80726 | -1.14240 |
| H                                               | -4.82627 | 0.18258  | 1.83386  | C | 8.70598  | -1.46650 | -0.81369 |
| H                                               | -4.00188 | -1.26974 | -2.11404 | C | 7.43861  | -1.03346 | -0.43768 |
| H                                               | -2.98198 | 0.90507  | -2.70582 | C | 4.42391  | -0.59051 | 0.25887  |
| H                                               | -7.30033 | -0.23741 | 0.50161  | C | 4.94375  | 0.24027  | 1.25434  |
| H                                               | -9.51505 | -1.13157 | 1.15719  | C | 4.33992  | 1.45603  | 1.55460  |
| H                                               | -9.83200 | -3.54202 | 1.60374  | C | 3.16984  | 1.84517  | 0.89093  |
| H                                               | -7.93529 | -5.12201 | 1.39175  | C | 2.63003  | 0.99957  | -0.08658 |
| H                                               | -5.42600 | -6.31910 | 0.97571  | C | 3.26597  | -0.19035 | -0.41189 |
| H                                               | -3.04843 | -6.77532 | 0.52307  | C | 1.69292  | 3.80485  | 0.30939  |
| H                                               | -2.33164 | -2.60525 | -0.28874 | C | 1.21784  | 5.00717  | 1.05162  |
| H                                               | 2.44137  | -2.45866 | -0.13920 | C | 0.35298  | 6.02819  | 0.65521  |
| H                                               | 3.52324  | -6.60221 | -0.66786 | C | 0.16298  | 7.07174  | 1.57513  |
| H                                               | 5.90104  | -6.00738 | -0.76221 | C | 0.78260  | 7.07434  | 2.82712  |
| H                                               | 8.37939  | -4.66246 | -0.77375 | C | 1.62083  | 6.02846  | 3.21661  |
| H                                               | 10.19028 | -2.97533 | -0.65865 | C | 1.82272  | 5.01018  | 2.29996  |
| H                                               | 9.66461  | -0.59129 | -0.27354 | C | 2.64578  | 3.77799  | 2.43880  |
| H                                               | 7.32121  | 0.17033  | -0.00662 | C | -1.26373 | -5.08822 | 0.12142  |
| H                                               | 4.90222  | 0.43515  | -1.75501 | C | -0.70483 | -6.34437 | 0.06639  |
| H                                               | 3.75960  | 2.57172  | -1.22856 | C | 0.70478  | -6.34438 | -0.06607 |
| H                                               | 2.73632  | 1.05989  | 2.65647  | C | 1.26366  | -5.08824 | -0.12132 |
| H                                               | 3.90821  | -1.06044 | 2.13560  | S | -0.00004 | -3.87915 | -0.00006 |
| H                                               | -0.65495 | 7.87343  | 1.21139  | H | 0.50725  | 7.88289  | -1.31381 |
| H                                               | 0.58581  | 7.99160  | 3.32681  | H | -0.59478 | 7.89690  | -3.50727 |
| H                                               | 2.18978  | 6.16621  | 3.96173  | H | -2.09680 | 6.00526  | -4.18894 |
| H                                               | -1.20134 | -6.96196 | -1.17151 | H | -4.75633 | 2.07981  | -2.32970 |
| H                                               | 1.38936  | -6.88744 | -1.41818 | H | -5.82452 | -0.06630 | -1.80414 |
|                                                 |          |          |          | H | -2.86086 | -0.80920 | 1.20202  |
|                                                 |          |          |          | H | -1.74109 | 1.28668  | 0.62394  |
| 95                                              |          |          |          | H | -7.25835 | 0.00680  | 0.20054  |
| da288-P-prop1-freq.out Energy: -1927013.9410385 |          |          |          | H | -9.51693 | -0.74805 | 0.85539  |
| O                                               | -1.44341 | 3.49232  | 0.82905  | H | -9.95454 | -3.11155 | 1.42759  |
| O                                               | -3.28260 | 3.42862  | -3.40088 | H | -8.11738 | -4.77501 | 1.38317  |
| O                                               | 1.44347  | 3.49231  | -0.82904 | H | -5.66277 | -6.07818 | 1.20442  |
| O                                               | 3.28267  | 3.42856  | 3.40088  | H | -3.29753 | -6.66803 | 0.93120  |
| N                                               | -2.53190 | 3.08667  | -1.20283 | H | -2.38130 | -2.65217 | -0.33650 |
| N                                               | -5.05818 | -1.81559 | 0.07271  | H | 2.38127  | -2.65220 | 0.33656  |
| N                                               | 5.05815  | -1.81565 | -0.07274 | H | 3.29741  | -6.66807 | -0.93117 |
| N                                               | 2.53195  | 3.08664  | 1.20283  | H | 5.66265  | -6.07826 | -1.20445 |
| C                                               | -1.69285 | 3.80487  | -0.30938 | H | 8.11728  | -4.77512 | -1.38326 |
| C                                               | -1.21776 | 5.00719  | -1.05159 | H | 9.95446  | -3.11170 | -1.42773 |
| C                                               | -0.35290 | 6.02820  | -0.65518 | H | 9.51690  | -0.74819 | -0.85553 |
| C                                               | -0.16289 | 7.07175  | -1.57508 |   |          |          |          |

|   |          |          |          |
|---|----------|----------|----------|
| H | 7.25835  | 0.00671  | -0.20063 |
| H | 5.82456  | -0.06637 | 1.80409  |
| H | 4.75640  | 2.07976  | 2.32967  |
| H | 1.74109  | 1.28666  | -0.62392 |
| H | 2.86083  | -0.80924 | -1.20201 |
| H | -0.50716 | 7.88288  | 1.31386  |
| H | 0.59488  | 7.89686  | 3.50733  |
| H | 2.09689  | 6.00521  | 4.18898  |
| H | -1.29105 | -7.25237 | 0.10866  |
| H | 1.29101  | -7.25238 | -0.10815 |

95

da288-P-prop2-freq.out Energy: -1927015.2765481

|   |          |          |          |
|---|----------|----------|----------|
| O | 1.36823  | 3.32420  | -0.86909 |
| O | 3.61017  | 3.50408  | 3.14538  |
| O | -1.39879 | 3.56074  | 0.87802  |
| O | -3.46600 | 3.45050  | -3.24284 |
| N | 2.64541  | 3.07653  | 1.06100  |
| N | 5.04203  | -1.89426 | -0.10047 |
| N | -5.11604 | -1.72684 | 0.31347  |
| N | -2.60587 | 3.14407  | -1.08141 |
| C | 1.73019  | 3.73514  | 0.20525  |
| C | 1.35584  | 5.00168  | 0.90521  |
| C | 0.49528  | 6.03069  | 0.51933  |
| C | 0.40745  | 7.12878  | 1.39065  |
| C | 1.12342  | 7.18199  | 2.58810  |
| C | 1.96623  | 6.13610  | 2.96675  |
| C | 2.06469  | 5.06071  | 2.10016  |
| C | 2.88580  | 3.82514  | 2.23801  |
| C | 3.24833  | 1.81813  | 0.76667  |
| C | 3.81234  | 1.59292  | -0.49059 |
| C | 4.39218  | 0.36279  | -0.77835 |
| C | 4.42828  | -0.64126 | 0.19013  |
| C | 3.86968  | -0.40896 | 1.44824  |
| C | 3.27294  | 0.81329  | 1.73562  |
| C | 6.41684  | -2.11940 | -0.19983 |
| C | 7.47115  | -1.21548 | -0.07359 |
| C | 8.76436  | -1.70947 | -0.21001 |
| C | 9.00534  | -3.06877 | -0.46263 |
| C | 7.95107  | -3.96593 | -0.57971 |
| C | 6.64007  | -3.49761 | -0.44681 |
| C | 4.37960  | -3.10955 | -0.27950 |
| C | 5.34046  | -4.12725 | -0.49591 |
| C | 4.89588  | -5.43673 | -0.70309 |
| C | 3.53786  | -5.70690 | -0.69910 |
| C | 2.57764  | -4.68312 | -0.51058 |
| C | 3.01274  | -3.36714 | -0.29895 |
| C | -4.48105 | -2.97420 | 0.28270  |
| C | -3.16578 | -3.28638 | -0.04831 |
| C | -2.76050 | -4.62667 | -0.01056 |
| C | -3.69445 | -5.63019 | 0.33607  |
| C | -5.00896 | -5.31399 | 0.64027  |
| C | -5.41979 | -3.97755 | 0.62268  |
| C | -6.45234 | -1.92428 | 0.68214  |
| C | -6.67530 | -3.31000 | 0.87992  |
| C | -7.94014 | -3.75638 | 1.27395  |
| C | -8.95463 | -2.82842 | 1.47078  |
| C | -8.71345 | -1.45880 | 1.28679  |
| C | -7.46491 | -0.98769 | 0.89430  |
| C | -4.50816 | -0.48748 | -0.01429 |
| C | -3.29040 | -0.12419 | 0.56550  |
| C | -2.65631 | 1.05702  | 0.20582  |
| C | -3.25730 | 1.92776  | -0.71061 |
| C | -4.49545 | 1.58557  | -1.26662 |
| C | -5.10030 | 0.37870  | -0.93641 |
| C | -1.69104 | 3.84971  | -0.25594 |
| C | -1.20819 | 5.00829  | -1.06192 |
| C | -0.28662 | 6.00708  | -0.74650 |
| C | -0.10990 | 7.01500  | -1.70889 |
| C | -0.79702 | 7.00537  | -2.92461 |
| C | -1.69436 | 5.98202  | -3.23338 |
| C | -1.88166 | 5.00006  | -2.27529 |
| C | -2.76088 | 3.80090  | -2.32990 |

|   |          |          |          |
|---|----------|----------|----------|
| C | 1.14938  | -5.00919 | -0.54762 |
| C | 0.52796  | -6.11660 | -1.07854 |
| C | -0.88291 | -6.10730 | -0.94475 |
| C | -1.37297 | -4.98838 | -0.31611 |
| S | -0.05081 | -3.93783 | 0.14722  |
| H | -0.25525 | 7.94706  | 1.13276  |
| H | 1.01230  | 8.04626  | 3.23243  |
| H | 2.52409  | 6.15506  | 3.89481  |
| H | 3.77929  | 2.36745  | -1.24403 |
| H | 4.81897  | 0.17501  | -1.75602 |
| H | 3.90663  | -1.18828 | 2.19959  |
| H | 2.84659  | 0.99446  | 2.71258  |
| H | 7.29088  | -0.16662 | 0.12750  |
| H | 9.60261  | -1.02830 | -0.11648 |
| H | 10.02567 | -3.41979 | -0.56410 |
| H | 8.14254  | -5.01632 | -0.76929 |
| H | 5.60685  | -6.24085 | -0.85747 |
| H | 3.20173  | -6.72790 | -0.82725 |
| H | 2.30056  | -2.56054 | -0.17601 |
| H | -2.46908 | -2.51819 | -0.35523 |
| H | -3.36249 | -6.65968 | 0.39115  |
| H | -5.70834 | -6.09972 | 0.90349  |
| H | -8.12491 | -4.81352 | 1.42929  |
| H | -9.93993 | -3.16168 | 1.77511  |
| H | -9.51479 | -0.74874 | 1.45719  |
| H | -7.28776 | 0.07263  | 0.76920  |
| H | -2.83191 | -0.77170 | 1.30176  |
| H | -1.71181 | 1.31236  | 0.65871  |
| H | -4.96292 | 2.23536  | -1.98974 |
| H | -6.03357 | 0.10242  | -1.41048 |
| H | 0.60235  | 7.80772  | -1.50959 |
| H | -0.61732 | 7.79996  | -3.63935 |
| H | -2.22629 | 5.94853  | -4.17607 |
| H | 1.06734  | -6.90427 | -1.58737 |
| H | -1.52583 | -6.88317 | -1.33956 |

95

da288-P-prop3-freq.out Energy: -1927015.7697768

|   |          |          |          |
|---|----------|----------|----------|
| O | -1.41771 | 3.37571  | 0.80025  |
| O | -3.41284 | 3.44407  | -3.34696 |
| O | 1.41186  | 3.37706  | -0.80214 |
| O | 3.40579  | 3.44955  | 3.34558  |
| N | -2.58022 | 3.07342  | -1.19541 |
| N | -5.09932 | -1.81495 | 0.04685  |
| N | 5.10189  | -1.80791 | -0.04430 |
| N | 2.57418  | 3.07704  | 1.19396  |
| C | -1.69659 | 3.74197  | -0.31400 |
| C | -1.23915 | 4.96316  | -1.04384 |
| C | -0.36656 | 5.97902  | -0.65168 |
| C | -0.19777 | 7.03907  | -1.55800 |
| C | -0.84828 | 7.06725  | -2.79306 |
| C | -1.70231 | 6.03242  | -3.17713 |
| C | -1.88037 | 4.99552  | -2.27706 |
| C | -2.73047 | 3.77948  | -2.41230 |
| C | -3.22919 | 1.84152  | -0.88934 |
| C | -3.83658 | 1.66515  | 0.35573  |
| C | -4.44605 | 0.45545  | 0.66299  |
| C | -4.47580 | -0.57735 | -0.27621 |
| C | -3.88396 | -0.38983 | -1.52662 |
| C | -3.25142 | 0.81044  | -1.83019 |
| C | -6.44917 | -1.98889 | 0.36296  |
| C | -7.48935 | -1.05992 | 0.34082  |
| C | -8.76026 | -1.50437 | 0.68992  |
| C | -8.99511 | -2.84076 | 1.04821  |
| C | -7.95700 | -3.76378 | 1.06042  |
| C | -6.66816 | -3.34425 | 0.71603  |
| C | -4.44651 | -3.04021 | 0.20492  |
| C | -5.39065 | -4.01150 | 0.61708  |
| C | -4.94998 | -5.31650 | 0.85795  |
| C | -3.61086 | -5.62739 | 0.69602  |
| C | -2.66703 | -4.65537 | 0.28216  |
| C | -3.10021 | -3.34530 | 0.03347  |
| C | 4.45158  | -3.03422 | -0.20453 |



|   |          |          |          |   |           |          |          |
|---|----------|----------|----------|---|-----------|----------|----------|
| C | 3.10519  | -3.34135 | -0.03768 | C | -0.21016  | 6.01798  | -0.55930 |
| C | 2.67456  | -4.65199 | -0.28793 | C | -0.05267  | 7.08703  | -1.45717 |
| C | 3.62146  | -5.62244 | -0.69864 | C | -0.75079  | 7.14887  | -2.66457 |
| C | 4.96055  | -5.30946 | -0.85641 | C | -1.64293  | 6.13933  | -3.02826 |
| C | 5.39856  | -4.00385 | -0.61399 | C | -1.80969  | 5.09414  | -2.13571 |
| C | 6.45300  | -1.97961 | -0.35617 | C | -2.69134  | 3.89967  | -2.25582 |
| C | 6.67527  | -3.33454 | -0.70886 | C | -3.17613  | 1.94901  | -0.74987 |
| C | 7.96586  | -3.75186 | -1.04941 | C | -3.78235  | 1.77377  | 0.49533  |
| C | 9.00240  | -2.82713 | -1.03382 | C | -4.42171  | 0.57504  | 0.79085  |
| C | 8.76426  | -1.49120 | -0.67597 | C | -4.47681  | -0.44509 | -0.15985 |
| C | 7.49155  | -1.04892 | -0.33067 | C | -3.87626  | -0.26144 | -1.40694 |
| C | 4.47558  | -0.57138 | 0.27755  | C | -3.21858  | 0.92685  | -1.69976 |
| C | 4.44531  | 0.46110  | -0.66197 | C | -6.52733  | -1.83062 | 0.26011  |
| C | 3.83367  | 1.66997  | -0.35573 | C | -7.54080  | -0.87591 | 0.18302  |
| C | 3.22477  | 1.84579  | 0.88867  | C | -8.85259  | -1.31326 | 0.33452  |
| C | 3.24731  | 0.81493  | 1.82976  | C | -9.15186  | -2.66669 | 0.55392  |
| C | 3.88191  | -0.38451 | 1.52719  | C | -8.13861  | -3.61478 | 0.62079  |
| C | 1.69022  | 3.74429  | 0.31191  | C | -6.81025  | -3.20397 | 0.47123  |
| C | 1.23106  | 4.96519  | 1.04117  | C | -4.53864  | -2.91784 | 0.26179  |
| C | 0.35725  | 5.97979  | 0.64844  | C | -5.54145  | -3.89550 | 0.47003  |
| C | 0.18699  | 7.04003  | 1.55427  | C | -5.15464  | -5.23026 | 0.62653  |
| C | 0.83722  | 7.06955  | 2.78944  | C | -3.81112  | -5.56260 | 0.58490  |
| C | 1.69241  | 6.03592  | 3.17413  | C | -2.80770  | -4.57845 | 0.40921  |
| C | 1.87196  | 4.99887  | 2.27453  | C | -3.18519  | -3.23853 | 0.24501  |
| C | 2.72356  | 3.78396  | 2.41046  | C | 4.34354   | -3.15929 | -0.25698 |
| C | -1.25874 | -5.02815 | 0.12683  | C | 2.99931   | -3.40829 | 0.00179  |
| C | -0.70054 | -6.28386 | 0.05581  | C | 2.53247   | -4.72631 | -0.08543 |
| C | 0.70700  | -6.28304 | -0.08777 | C | 3.42963   | -5.76344 | -0.43405 |
| C | 1.26611  | -5.02663 | -0.13806 | C | 4.76545   | -5.50453 | -0.69638 |
| S | 0.00396  | -3.81745 | 0.00484  | C | 5.24281   | -4.19267 | -0.61598 |
| H | 0.47745  | 7.84594  | -1.29652 | C | 6.36233   | -2.18531 | -0.59541 |
| H | -0.67628 | 7.90218  | -3.46226 | C | 6.52977   | -3.57249 | -0.83599 |
| H | -2.20941 | 6.03104  | -4.13406 | C | 7.78945   | -4.05866 | -1.19939 |
| H | -3.80667 | 2.45872  | 1.08885  | C | 8.85110   | -3.17004 | -1.31342 |
| H | -4.89657 | 0.30434  | 1.63626  | C | 8.66854   | -1.80160 | -1.06175 |
| H | -3.91940 | -1.18669 | -2.25932 | C | 7.42723   | -1.29035 | -0.69795 |
| H | -2.79369 | 0.95324  | -2.79903 | C | 4.47364   | -0.68208 | 0.10263  |
| H | -7.31654 | -0.02927 | 0.05700  | C | 3.96520   | -0.46773 | 1.38560  |
| H | -9.58620 | -0.80215 | 0.68075  | C | 3.39184   | 0.75308  | 1.71872  |
| H | -9.99799 | -3.15358 | 1.31453  | C | 3.34604   | 1.78034  | 0.77403  |
| H | -8.14413 | -4.79682 | 1.33196  | C | 3.87215   | 1.57812  | -0.50353 |
| H | -5.64654 | -6.08033 | 1.18532  | C | 4.42156   | 0.34647  | -0.83970 |
| H | -3.27447 | -6.63285 | 0.91354  | C | 1.83779   | 3.72485  | 0.28269  |
| H | -2.40212 | -2.58328 | -0.28958 | C | 1.44101   | 4.94762  | 1.04530  |
| H | 2.40504  | -2.57986 | 0.28218  | C | 0.56990   | 5.98402  | 0.70722  |
| H | 3.28806  | -6.62881 | -0.91638 | C | 0.46407   | 7.03561  | 1.63286  |
| H | 5.65931  | -6.07232 | -1.18136 | C | 1.17412   | 7.03766  | 2.83484  |
| H | 8.15553  | -4.78453 | -1.32058 | C | 2.02798   | 5.98420  | 3.16452  |
| H | 10.00660 | -3.13825 | -1.29715 | C | 2.14282   | 4.95502  | 2.24557  |
| H | 9.58901  | -0.78762 | -0.66416 | C | 2.97582   | 3.72281  | 2.32662  |
| H | 7.31613  | -0.01860 | -0.04723 | C | -1.39496  | -4.96736 | 0.41867  |
| H | 4.89728  | 0.31042  | -1.63464 | C | -0.82018  | -6.12125 | 0.90042  |
| H | 3.80346  | 2.46336  | -1.08904 | C | 0.58951   | -6.16359 | 0.76608  |
| H | 2.78827  | 0.95733  | 2.79805  | C | 1.12614   | -5.03968 | 0.18535  |
| H | 3.91767  | -1.18120 | 2.26006  | S | -0.15115  | -3.91718 | -0.23256 |
| H | -0.48919 | 7.84594  | 1.29230  | H | 0.65180   | 7.87375  | -1.21194 |
| H | 0.66407  | 7.90456  | 3.45824  | H | -0.58582  | 7.98945  | -3.32844 |
| H | 2.19930  | 6.03554  | 4.13117  | H | -2.18704  | 6.16267  | -3.96438 |
| H | -1.28651 | -7.19215 | 0.09223  | H | -3.73451  | 2.56089  | 1.23486  |
| H | 1.29188  | -7.19118 | -0.14074 | H | -4.87816  | 0.42414  | 1.76150  |
|   |          |          |          | H | -3.92695  | -1.05276 | -2.14476 |
|   |          |          |          | H | -2.75674  | 1.06899  | -2.66690 |
|   |          |          |          | H | -7.31630  | 0.16885  | 0.00707  |
|   |          |          |          | H | -9.65965  | -0.59144 | 0.27917  |
|   |          |          |          | H | -10.18515 | -2.97281 | 0.66886  |
|   |          |          |          | H | -8.37493  | -4.66046 | 0.78399  |
|   |          |          |          | H | -5.89913  | -6.00520 | 0.77187  |
|   |          |          |          | H | -3.52105  | -6.60159 | 0.67570  |
|   |          |          |          | H | -2.43860  | -2.46232 | 0.13150  |
|   |          |          |          | H | 2.32963   | -2.60663 | 0.28585  |
|   |          |          |          | H | 3.05105   | -6.77384 | -0.52748 |
|   |          |          |          | H | 5.42922   | -6.31491 | -0.97669 |
|   |          |          |          | H | 7.93628   | -5.11647 | -1.38755 |

95  
da288-P-prop5-freq.out Energy: -1927015.9953100

|   |          |          |          |
|---|----------|----------|----------|
| O | -1.27174 | 3.41891  | 0.90033  |
| O | -3.41537 | 3.59265  | -3.16853 |
| O | 1.49517  | 3.37347  | -0.81846 |
| O | 3.69705  | 3.36616  | 3.22358  |
| N | -2.51121 | 3.17255  | -1.05561 |
| N | -5.14544 | -1.66726 | 0.13598  |
| N | 5.03209  | -1.94437 | -0.24136 |
| N | 2.75153  | 3.03110  | 1.11287  |
| C | -1.58125 | 3.80774  | -0.19789 |
| C | -1.12217 | 5.02859  | -0.92887 |

|   |          |          |          |
|---|----------|----------|----------|
| H | 9.83182  | -3.53476 | -1.59574 |
| H | 9.51239  | -1.12658 | -1.14924 |
| H | 7.29584  | -0.23447 | -0.49685 |
| H | 4.01794  | -1.26158 | 2.12047  |
| H | 2.99843  | 0.91450  | 2.71243  |
| H | 3.82393  | 2.36847  | -1.23910 |
| H | 4.80469  | 0.17587  | -1.83830 |
| H | -0.20797 | 7.85756  | 1.41353  |
| H | 1.04961  | 7.86722  | 3.52104  |
| H | 2.58169  | 5.96282  | 4.09502  |
| H | -1.39117 | -6.90680 | 1.37689  |
| H | 1.19954  | -6.98036 | 1.1292   |

## References

- (1) Hesse, M.; Meier, H.; Zeeh, B.; Dunmur, R.; Murray, M. *Spectroscopic Methods in Organic Chemistry*, 2th Edition.; Thieme Verlag, 2008. <https://doi.org/10.1055/b-003-108602>.
- (2) M. J. Frisch, G. W. Trucks, H. B. Schlegel, G. E. Scuseria, M. A. Robb, J. R. Cheeseman, G. Scalmani, V. Barone, G. A. Petersson, H. Nakatsuji, X. Li, M. Caricato, A. Marenich, J. Bloino, B. G. Janesko, R. Gomperts, B. Mennucci, H. P. Hratchian, J. V. Ortiz, A. F. Izmaylov, J. L. Sonnenberg, D. Williams-Young, F. Ding, F. Lipparini, F. Egidi, J. Goings, B. Peng, A. Petrone, T. Henderson, D. Ranasinghe, V. G. Zakrzewski, J. Gao, N. Rega, G. Zheng, W. Liang, M. Hada, M. Ehara, K. Toyota, R. Fukuda, J. Hasegawa, M. Ishida, T. Nakajima, Y. Honda, O. Kitao, H. Nakai, T. Vreven, K. Throssell, J. A. Montgomery, Jr., J. E. Peralta, F. Ogliaro, M. Bearpark, J. J. Heyd, E. Brothers, K. N. Kudin, V. N. Staroverov, T. Keith, R. Kobayashi, J. Normand, K. Raghavachari, A. Rendell, J. C. Burant, S. S. Iyengar, J. Tomasi, M. Cossi, J. M. Millam, M. Klene, C. Adamo, R. Cammi, J. W. Ochterski, R. L. Martin, K. Morokuma, O. Farkas, J. B. Foresman, and D. J. Fox., Gaussian 09, Revision E.01. Gaussian, Inc., Wallingford CT, 2016.
- (3) Pracht, P.; Bohle, F.; Grimme, S. Automated Exploration of the Low-Energy Chemical Space with Fast Quantum Chemical Methods. *Phys. Chem. Chem. Phys.* **2020**, *22* (14), 7169–7192. <https://doi.org/10.1039/C9CP06869D>.
- (4) Bruhn, T.; Schaumlöffel, A.; Hemberger, Y.; Bringmann, G. SpecDis: Quantifying the Comparison of Calculated and Experimental Electronic Circular Dichroism Spectra. *Chirality* **2013**, *25* (4), 243–249. <https://doi.org/10.1002/chir.22138>.
- (5) Pescitelli, G.; Bruhn, T. Good Computational Practice in the Assignment of Absolute Configurations by TDDFT Calculations of ECD Spectra. *Chirality* **2016**, *28* (6), 466–474. <https://doi.org/10.1002/chir.22600>.
